# Supplementary material for: Change in prevalence rates of physical and sexual intimate partner violence against women: data from two cross-sectional studies in New Zealand, 2003 and 2019
Source: PubMed Central journal article supplement — BMJ Open. 2021 Mar 23;11(3):e044907. doi: 10.1136/bmjopen-2020-044907 (PMC7993160; doi:10.1136/bmjopen-2020-044907), 2021-03-23
Supplement: bmjopen-2020-044907.draft_revisions.pdf [file bmjopen-2020-044907.draft_revisions.pdf]

# BMJ Open

BMJ Open is committed to open peer review. As part of this commitment we make the peer review history of every article we publish publicly available.

When an article is published we post the peer reviewers' comments and the authors' responses online. We also post the versions of the paper that were used during peer review. These are the versions that the peer review comments apply to.

The versions of the paper that follow are the versions that were submitted during the peer review process. They are not the versions of record or the final published versions. They should not be cited or distributed as the published version of this manuscript.

BMJ Open is an open access journal and the full, final, typeset and author-corrected version of record of the manuscript is available on our site with no access controls, subscription charges or pay-per-view fees (<http://bmjopen.bmj.com>).

If you have any questions on BMJ Open's open peer review process please email [info.bmjopen@bmj.com](mailto:info.bmjopen@bmj.com)

# BMJ Open

## Change in prevalence rates of women's physical and sexual intimate partner violence victimization: Data from two cross-sectional studies in New Zealand, 2003-2019

|                               |                                                                                                                                                                                                                                                                                                                                                                                                                                                                                                                                                                                |
|-------------------------------|--------------------------------------------------------------------------------------------------------------------------------------------------------------------------------------------------------------------------------------------------------------------------------------------------------------------------------------------------------------------------------------------------------------------------------------------------------------------------------------------------------------------------------------------------------------------------------|
| Journal:                      | <i>BMJ Open</i>                                                                                                                                                                                                                                                                                                                                                                                                                                                                                                                                                                |
| Manuscript ID                 | bmjopen-2020-044907                                                                                                                                                                                                                                                                                                                                                                                                                                                                                                                                                            |
| Article Type:                 | Original research                                                                                                                                                                                                                                                                                                                                                                                                                                                                                                                                                              |
| Date Submitted by the Author: | 18-Sep-2020                                                                                                                                                                                                                                                                                                                                                                                                                                                                                                                                                                    |
| Complete List of Authors:     | Fanslow, Janet; The University of Auckland Faculty of Medical and Health Sciences, School of Population Health<br>Hashemi, Ladan; The University of Auckland Faculty of Medical and Health Sciences, School of Population Health<br>Malihi, Zarintaj; The University of Auckland Faculty of Medical and Health Sciences, School of Population Health<br>Gulliver, Pauline; The University of Auckland Faculty of Medical and Health Sciences, School of Population Health<br>McIntosh, Tracey; The University of Auckland Faculty of Arts, Indigenous Studies, Faculty of Arts |
| Keywords:                     | EPIDEMIOLOGY, PUBLIC HEALTH, SOCIAL MEDICINE                                                                                                                                                                                                                                                                                                                                                                                                                                                                                                                                   |
|                               |                                                                                                                                                                                                                                                                                                                                                                                                                                                                                                                                                                                |

SCHOLARONE™  
Manuscripts

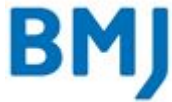

I, the Submitting Author has the right to grant and does grant on behalf of all authors of the Work (as defined in the below author licence), an exclusive licence and/or a non-exclusive licence for contributions from authors who are: i) UK Crown employees; ii) where BMJ has agreed a CC-BY licence shall apply, and/or iii) in accordance with the terms applicable for US Federal Government officers or employees acting as part of their official duties; on a worldwide, perpetual, irrevocable, royalty-free basis to BMJ Publishing Group Ltd ("BMJ") its licensees and where the relevant Journal is co-owned by BMJ to the co-owners of the Journal, to publish the Work in this journal and any other BMJ products and to exploit all rights, as set out in our [licence](#).

The Submitting Author accepts and understands that any supply made under these terms is made by BMJ to the Submitting Author unless you are acting as an employee on behalf of your employer or a postgraduate student of an affiliated institution which is paying any applicable article publishing charge ("APC") for Open Access articles. Where the Submitting Author wishes to make the Work available on an Open Access basis (and intends to pay the relevant APC), the terms of reuse of such Open Access shall be governed by a Creative Commons licence – details of these licences and which [Creative Commons](#) licence will apply to this Work are set out in our licence referred to above.

Other than as permitted in any relevant BMJ Author's Self Archiving Policies, I confirm this Work has not been accepted for publication elsewhere, is not being considered for publication elsewhere and does not duplicate material already published. I confirm all authors consent to publication of this Work and authorise the granting of this licence.

1  
2  
3  
4  
5  
6  
7  
8  
9  
10  
11  
12  
13  
14  
15  
16  
17  
18  
19  
20  
21  
22  
23  
24  
25  
26  
27  
28  
29  
30  
31  
32  
33  
34  
35  
36  
37  
38  
39  
40  
41  
42  
43  
44  
45  
46  
47  
48  
49  
50  
51  
52  
53  
54  
55  
56  
57  
58  
59  
60

For peer review only

1  
2  
3 **Change in prevalence rates of women's physical and sexual intimate partner violence**  
4 **victimization: Data from two cross-sectional studies in New Zealand, 2003-2019**  
5  
6  
7  
8

9 Janet Fanslow, <sup>a</sup> Ladan Hashemi, <sup>a</sup> Zarintaj Malihi <sup>a</sup>, Pauline Gulliver,<sup>a</sup> and  
10 Tracey McIntosh<sup>b</sup>  
11

12  
13 <sup>a</sup> *Social and Community Health, School of Population Health, Faculty of Medical and Health Sciences,*  
14 *University of Auckland, Auckland, New Zealand*  
15

16 <sup>b</sup> *Indigenous Studies, Faculty of Arts, University of Auckland, Auckland, New Zealand*  
17  
18  
19  
20

21 \*Corresponding Author:  
22 Janet L. Fanslow  
23

24 Social and Community Health  
25 School of Population Health  
26 University of Auckland  
27 Private Bag 92019  
28 Auckland, 1142  
29 Auckland, New Zealand  
30  
31

32 [j.fanslow@auckland.ac.nz](mailto:j.fanslow@auckland.ac.nz)  
33  
34  
35  
36

37 word count=3716  
38  
39  
40

41 keywords: change, prevalence rates, Intimate Partner Violence, physical violence, sexual violence,  
42 help-seeking, attitudes.  
43  
44  
45  
46  
47  
48  
49  
50  
51  
52  
53  
54  
55  
56  
57  
58  
59  
60

1  
2  
3 **Change in prevalence rates of women's physical and sexual intimate partner violence**  
4 **victimization: Data from two cross-sectional studies in New Zealand, 2003-2019**  
5  
6  
7  
8  
9

10 **Abstract**

11 **Objectives:** To explore changes in reported prevalence of physical and sexual intimate  
12 partner violence (IPV) between 2003 and 2019. Changes in attitudes supportive of violence  
13 and in help seeking behaviour following disclosure were also explored.  
14  
15

16 **Design:** Two cross-sectional studies  
17

18 **Setting and participants:** National, cross-sectional studies on family violence conducted in  
19 New Zealand in 2003 and 2019. Female respondents aged 18-64 years old were included  
20 (2003 n=2,674, 2019 n=944).  
21  
22

23 **Main outcome measures:** Prevalence rates of lifetime and past 12-month physical and  
24 sexual IPV, attitudes towards gender roles and acceptability of a man hitting his wife, help  
25 sought, and received following disclosure were compared between the study years.  
26  
27

28 **Results:** Lifetime prevalence of physical IPV was unchanged between 2003 and 2019  
29 (AOR=0.99; 95% CI=0.82-1.17). There was a significant decrease in the proportion of women  
30 who reported experiencing 12-month physical IPV (AOR=0.53; 95%CI=0.32, 0.89). Small  
31 reductions in rates for lifetime sexual IPV were also observed (AOR=0.78; 95%CI=0.62-0.98).  
32 In 2019, fewer women agreed with one or more statements supportive of traditional gender  
33 roles (46.9%; 95%CI= 45-48.7) in 2003; 35.3% (95%CI=32.4-38.3 in 2019). There was a  
34 significant reduction in women endorsing one or more justifications for a man to hit his wife  
35 from 3.7% (95%CI= 3.1-4.5) in 2003 to 2.1% (95%CI= 1.3-3.2) in 2019. A significant increase  
36 was noted in the proportion of women who sought help from community organizations (from  
37 4.6% [95%CI= 3.4-6.1] in 2003 to 7.5% [95%CI= 4.8-10.9] in 2019).  
38  
39

40 **Conclusion:** While reductions in 12-month physical IPV are positive, prevention efforts need  
41 to be maintained and strengthened to address the substantial problem of IPV, as lifetime  
42 prevalence remained stable over the 15-year time interval.  
43  
44  
45  
46  
47  
48  
49  
50  
51  
52  
53  
54  
55  
56  
57  
58  
59  
60

### Strengths and limitations of this study

- The current investigation used large, representative samples of women in two population-based surveys in 2003 and 2019.
- Repeated surveys of violence exposure, agreement to attitudes supportive of violence and help-seeking behaviours provide an understanding of the effectiveness of population-based policies and programmes.
- True prevalence estimates may be higher as it is expected that women in severely abusive relationships would be unable or unwilling to participate in such a survey.
- Repeated surveys are required to determine if the observed changes are sustained and present a trend.

**Funding statement** This work was supported by the Health Research Council of New Zealand (Grant 02/207) for 2003 study and the New Zealand Ministry of Business, Innovation and Employment (Contract number CONT-42799-HASTR-UOA) for 2019 study.

### Competing interest:

The authors declare that no competing interests exist. The funders had no role in study design, data collection and analysis, decision to publish, or preparation of the manuscript.

### Introduction

Intimate Partner Violence (IPV) has been reported by the UN Secretary-General (2006) as “the most common form of violence experienced by women globally”<sup>1</sup>. IPV includes physical and sexual violence, as well as psychological abuse, controlling behaviour and economic abuse. Efforts to respond to IPV in high income countries include the introduction of legislation or national action plans, and strengthening the non-for-profit sector to respond to the violence experienced<sup>2</sup>. However, the effectiveness of these strategies is not clear, as there is a lack of consistent and reliable data available to monitor changes in the prevalence of IPV over time. The limited research available tends to rely on analysis of IPV homicide data, or other forms of administrative data from agencies such as health providers, police or courts<sup>2</sup>. While providing useful insights, these data do not reflect the magnitude of the problem at the population level, as many who experience IPV frequently do not present to services, or the underlying cause of their presentation may not be identified or recorded<sup>2,3</sup>.

1  
2  
3 Other attempts to measure changes in IPV occurrence over time have relied on data from  
4 general crime victimisation surveys<sup>4</sup>, but the overall framing of the questionnaire (i.e., a survey  
5 about 'crime') tends to lower the reporting of the violent behaviours within intimate  
6 relationships<sup>2, 3</sup>. Surveys conducted for other purposes (e.g., health surveys) which include a  
7 dedicated module on family violence provide some information, but can also be problematic,  
8 as space limitations for specific modules means that they might not be able to include questions  
9 that canvas the full range of violent experiences<sup>5</sup>.

10  
11  
12  
13  
14  
15 The emerging consensus is that 'population-based stand-alone surveys are the instruments of  
16 choice' for collecting statistics on violence against women<sup>6</sup>. To date, specific violence against  
17 women surveys have been carried out in several high-income countries (for examples U.S.A.<sup>7</sup>,  
18 Canada<sup>8</sup>, Australia<sup>9</sup>, European Union<sup>10</sup>, Finland<sup>11, 12</sup>, New Zealand<sup>13</sup>). However, with an  
19 exception of Australia and Finland, the surveys have generally been one-off efforts and thus  
20 do not allow for time-related comparisons. Without repeated, comparable surveys, it is not  
21 possible to determine if there are overall changes in the occurrence of IPV, or if there are  
22 differential patterns of change for specific sub-groups within the population.

23  
24  
25  
26  
27  
28  
29 According to the World Health Organization, violence results from the complex interplay  
30 between individual, relationship, social, cultural and environmental factors<sup>14</sup>. The ecological  
31 model has been important in helping determine risk and protective factors associated with  
32 violence occurrence, but also holds promise for prevention, as it carries the assumption that  
33 changes in contributing factors can potentially lead to changes in prevalence<sup>15</sup>. To date, the  
34 limited research that has explored differences in the prevalence of IPV over time has suggested  
35 that population-level changes in demographic factors, such as shifts in age, education,  
36 relationship status, and socio-economic factors may contribute to the observed prevalence  
37 changes<sup>4, 6, 16, 17</sup>. However, changes in environmental and social norms that may condone or  
38 help perpetuate violence, and associated effects on violence occurrence have received scant  
39 attention in the research.  
40  
41  
42  
43  
44  
45  
46  
47  
48  
49  
50  
51  
52  
53  
54  
55  
56  
57  
58  
59  
60



1  
2  
3  
4  
5  
6  
7  
8  
9  
10  
11  
12  
13  
14  
Community-level norms, such as acceptance of ‘traditional’ gender roles and beliefs in the justification of ‘circumstances in which it is acceptable for a man to hit his wife’ are associated with perpetration of IPV<sup>18</sup>. In some countries, women’s acceptance of these attitudes has been found to be associated with their victimisation<sup>19</sup>. For these reasons, attitudes have been a key target of community education campaigns aimed at preventing violence against women<sup>20</sup>. However, to date, there has been little examination of the effectiveness of these initiatives at changing attitudes, or on any associated changes in violence rates<sup>20-22</sup>.

15  
16  
17  
18  
19  
20  
21  
22  
23  
24  
25  
26  
27  
28  
29  
30  
31  
32  
33  
New Zealand is one of few high-income countries where more than one comprehensive population-based survey of violence against women has been conducted, the first survey was conducted in 2003, and the second survey in 2019. Between the two surveys, a series of actions were taken to address family violence including; legislation (e.g. amendments to family violence law and protection for victims act), and prevention campaigns (e.g. the Family Violence: It’s not ok national campaign, and ACC-funded mates and dates high schools programme on healthy relationships). Many of these initiatives have focussed on addressing physical and sexual violence and have included strong messaging about the importance of help-seeking by those experiencing violence. Repeat surveys on attitudes supporting violence may provide evidence concerning the impact of such campaigns at the population level.

34  
35  
36  
37  
38  
39  
40  
41  
42  
43  
44  
45  
46  
47  
In the current study, using data from two New Zealand cross-sectional population-based surveys we aimed to: (a) describe changes in the reported prevalence rates of physical and sexual IPV between 2003 and 2019, (b) examine whether changes in women’s sociodemographic characteristics are associated with changes in IPV prevalence rates, and (c) determine whether changes in the reported prevalence rates are consistent across population subgroups. We also sought to determine if there were (d) changes in attitudes supportive of violence and (e) changes in help-seeking for those who reported experiencing IPV.

## 48 49 50 **Method**

### 51 52 53 54 **Procedure and participants**

55  
56  
57  
58  
59  
60  
Data was drawn from two national cross-sectional studies on family violence conducted in New Zealand in 2003 and 2019. A comprehensive description of the methods used in the 2003 and 2019 surveys have been previously presented.<sup>13</sup> A brief description of two surveys is presented here.

The 2003 study was conducted in Auckland and Waikato regions. For the 2019 study, Northland was also included in the sampling. Together the Auckland, Northland, and Waikato

1  
2  
3 regions account for approximately 40% of the New Zealand population and include a diverse  
4 population of Māori (Indigenous people of New Zealand), Pasifika, Asian and European New  
5 Zealanders.  
6  
7

8 Sampling strategies were similar in both surveys. A population-based cluster sampling scheme  
9 with a fixed number of dwellings per cluster was used. Primary sampling units (PSUs) were  
10 based on meshblock boundaries which contain between 50 and 100 dwellings. The starting  
11 point consisted of a randomly selected street and street number within each PSU. Interviewers  
12 made up to seven visits to each selected household to identify and recruit study participants.  
13  
14  
15  
16  
17 Non-residential, aged-care and short-term residential properties were excluded.

18 **Eligibility:** To be eligible to participate in the survey, household members needed to be able  
19 to speak conversational English, have lived in the household for at least one month and slept  
20 in the house for four or more nights a week.  
21  
22

23 Of the households invited, 88% in 2003 and 78% in 2019 agreed to participate. Of the eligible  
24 women, 76% in 2003 and 63% in 2019 participated, yielding an overall response rate of 67%  
25 in 2003 and 63.7% in 2019.  
26  
27

28 Participants of the 2003 study were 2855 women aged 18-64 years. In 2019, the eligible  
29 population was expanded to include women and men aged 16 years and older resulting in 2,888  
30 completed interviews (n=1464 women, n=1423 men, n=1 other). For the purpose of this paper,  
31 only ever-partnered women aged 18-64 years from each sample were included, equivalent to  
32 almost 94% of all women surveyed in both waves (2003, n= 2674; 2019, n=944). Demographic  
33 characteristics of ever-partnered women aged 18-64 years in 2003 and 2019 surveys are  
34 presented in Table 1.  
35  
36  
37  
38  
39  
40  
41  
42

43 **Representativeness:** In both surveys, the ethnicity, marital status, and deprivation level  
44 distribution of the sample were closely comparable to the general population, however both  
45 samples were under-represented for younger women (ages 20-29 in 2003, 16-29 in 2019).  
46  
47

#### 48 **Safety and ethics considerations**

49 Ethics and safety recommendations for research on violence against women were followed  
50 throughout the research<sup>23</sup>. One individual was randomly selected from each household for the  
51 interview. In households with more than one eligible resident, the participant was randomly  
52 selected. Interviews were conducted in privacy with no one over the age of two years present.  
53  
54  
55  
56  
57  
58  
59  
60 At the completion of the interview, interviewers provided all respondents with a list of  
approved support agencies regardless of disclosure status. Written informed consent was  
obtained from all participants.

1  
2  
3 Ethics approval was granted through the University of Auckland human participants' ethics  
4 committee (reference number 2002/199 for the 2003 study, and 2015/ 018244 for the 2019  
5 study).  
6  
7  
8  
9

### 10 **Patients and Public involvement**

11 Patients or the public were not involved in the design, conduct or reporting or dissemination  
12 plans of our research.  
13

### 14 **Study instrument and measures**

15 To collect data, the WHO Multi-Country Study on Women's Health and Domestic Violence  
16 Against Women (WHO MCS) <sup>24</sup> was used in both surveys.  
17

18 'Intimate partners' included male current or ex-partners that the women were married to or had  
19 lived with, or current regular male sexual partners. Definitions are presented in Table 2 for:  
20 the physical and sexual IPV; socio-demographic characteristics; attitudes towards gender roles,  
21 and acceptance of attitudes justifying a man hitting his wife. Sources of help sought (who told  
22 about violence) and help received (sources who provided help) are also described  
23 (Supplementary Table 1).  
24  
25  
26  
27  
28  
29  
30

### 31 **Analytic procedure**

32 To explore whether there were any underlying differences in demographic characteristics of  
33 the respondents at the two time periods, the 2003 and 2019 samples were compared in terms  
34 of age, relationship status, education attainment, access to an independent source of income,  
35 and area deprivation level using chi square tests.  
36

37 Then, the prevalence rates of physical and sexual IPV were compared between two samples  
38 with results presented as percentages with 95% confidence intervals. As the results for  
39 "moderate" and "severe" and physical IPV showed similar patterns to any physical IPV, in  
40 the following analyses, only the results for *any* physical IPV are presented. To identify  
41 evidence of differences in the estimated prevalence over time, odds ratio (OR) and 95% CIs  
42 for reported experience of physical and sexual IPV were calculated using univariate logistic  
43 regression models, with the study year as the predictor. The same procedure was followed for  
44 assessing differences in the attitudes towards gender roles, attitudes towards acceptability of a  
45 man hitting his wife, help sought, and help received between the study years. For help-seeking  
46 variables, the analyses were restricted to women who reported lifetime experience of physical  
47 or sexual IPV only.  
48  
49  
50  
51  
52  
53  
54  
55  
56  
57  
58  
59  
60

Then, to determine if the noted differences in the prevalence rates of IPV between the two study years found in the univariate analyses remained significant after controlling for sociodemographic characteristics, the following steps were taken:

- First, the association between each socio-demographic characteristic and each type of IPV (lifetime or 12-month physical and sexual IPV) was explored using univariate logistic regression models with results presented as unadjusted odds ratios (OR) with 95% CIs.
- Second, multivariate analyses were conducted, with the study year and sociodemographic characteristics included, and results were presented as adjusted odds ratios (AOR) with 95% CIs.

Finally, to determine whether the noted changes in the reported prevalence rates were consistent across population subgroups, multivariate logistic regression models with interaction terms (between each sociodemographic characteristic and the study year) were tested. Potential confounders (e.g. age, education, relationship status, independent income, and area deprivation level) and the study year were included in these analyses.

All analyses were performed on a pooled dataset of the two samples. Missing data including: do not know, do not remember, and no responses were excluded from all analyses. All analyses were conducted using Stata/SE 15.1<sup>25</sup>.

## Results

### *Demographic Characteristics of the 2003 and 2019 Survey Respondents*

Differences between two study samples in terms of sociodemographic characteristics are presented in **Table 1**. In general, there were more women over 45 years in 2019 (25.8%) compared with 2003 (15.5%). Additionally, a higher proportion of the sample had attained tertiary education in 2019 (66.5%) compared with 44.4% in 2003. A smaller proportion of women in 2019 reporting having an independent source of income (73.7%) compared to 79.4% in 2003. Finally, a smaller proportion of participants lived in the least deprived areas in 2019 (28.6%) compared with 2003 (34.3%).

Table 1. Demographic characteristics of ever-partnered women aged 18-64 years in 2003 and 2019 surveys

|                       | 2003       | 2019        | p value |
|-----------------------|------------|-------------|---------|
| <b>Age categories</b> |            |             | 0.001   |
| 18-24                 | 182 (6.81) | 45 (4.77)   |         |
| 25-34                 | 581(21.75) | 169 (17.90) |         |

|                                    |                    |                   |       |
|------------------------------------|--------------------|-------------------|-------|
| 35-44                              | 857(32.09)         | 218 (23.09)       |       |
| 45-54                              | 637(23.85)         | 268 (28.39)       |       |
| 55-64                              | 414(15.50)         | 244 (25.85)       |       |
| <b>Current relationship status</b> |                    |                   | 0.8   |
| Married                            | 1685 (63.06)       | 601 (63.67)       |       |
| Cohabiting                         | 574 (21.48)        | 201 (21.29)       |       |
| Divorced/separated/ broken up      | 353 (13.21)        | 117 (12.39)       |       |
| Widowed                            | 60 (2.25)          | 25 (2.65)         |       |
| <b>Education attainment</b>        |                    |                   | 0.001 |
| Primary /Secondary                 | 1478 (56.5)        | 315 (33.5)        |       |
| Higher                             | 1187 (44.4)        | 625 (66.5)        |       |
| <b>Independent income</b>          |                    |                   | 0.001 |
| Yes                                | 2122/2673<br>79.4  | 696/944<br>73.7   |       |
| No                                 | 551/2673<br>(20.6) | 248/944<br>(26.3) |       |
| <b>Deprivation level</b>           |                    |                   | 0.001 |
| Least deprived                     | 914 (34.3)         | 270 (28.6)        |       |
| Moderately deprived                | 1045 (39.2)        | 393 (41.6)        |       |
| Most deprived                      | 708 (26.5)         | 281 (29.8)        |       |

Data are n (Col%)

### *Characteristics of women reporting lifetime and past-12 months physical or sexual IPV*

#### *Lifetime physical IPV:*

All sociodemographic factors were significantly associated with reporting lifetime physical IPV in the multivariate model, with the exception of “access to independent income”. Women aged 25 years and above were more likely to report having experienced at least one act of lifetime physical IPV. Compared with married women, a higher proportion of women who were cohabiting, divorced, or widowed reported experiencing lifetime physical IPV. Similarly, those who were living in the moderately or most deprived areas were more likely to report the experience of a lifetime physical IPV compared with those living in the least deprived areas. A lower proportion of women with tertiary education reported having experienced lifetime physical IPV (Table 2).

Table 2. Characteristics of women reporting a lifetime and past-12 months **Physical IPV** in pooled database from two cross-sectional studies in New Zealand

|                                  | Lifetime                |                         | Univariate Model Odds Ratio (95%CI) | *Multivariate Model AOR (95%CI) | Past 12-month          |                       | Univariate Model Odds Ratio (95%CI) | *Multivariate Model AOR (95%CI) |
|----------------------------------|-------------------------|-------------------------|-------------------------------------|---------------------------------|------------------------|-----------------------|-------------------------------------|---------------------------------|
|                                  | 2003<br>n<br>% (95%CI)  | 2019<br>n<br>% (95%CI)  |                                     |                                 | 2003<br>n% (95%CI)     | 2019<br>n% (95%CI)    |                                     |                                 |
| <b>Year (ref=2003)</b>           | 856<br>32.0 (30.3-33.8) | 291<br>30.9 (27.9-33.9) | 0.95<br>(0.81-1.11)                 | 0.99 (0.82-1.17)                | 118<br>4.4 (3.7-5.3)   | 19<br>2.0 (1.2-3.1)   | 0.44 (0.27-0.73)                    | 0.53 (0.32-0.89)                |
| <b>Age categories</b>            |                         |                         |                                     |                                 |                        |                       |                                     |                                 |
| 18-24                            | 53<br>29.1(22.6-36.3)   | 14<br>31.1(18.2-46.6)   | 1.00                                | 1.00                            | 18<br>9.9 (6.0-15.2)   | 4<br>8.9 (2.5-21.2)   | 1.00                                | 1.00                            |
| 25-34                            | 210<br>36.1(32.2-40.2)  | 36<br>21.3(15.4-28.2)   | 1.17 (0.84-1.61)                    | 1.77 (1.26-2.50)                | 49<br>8.4 (6.3-11.0)   | 4<br>2.4 (0.6-5.9)    | 0.71 (0.42-1.19)                    | 0.91 (0.52-1.56)                |
| 35-44                            | 278<br>32.5 (29.3-35.7) | 71<br>32.6 (26.4-39.2)  | 1.15 (0.84-1.57)                    | 2.14 (1.53-3.01)                | 35<br>4.1 (2.9-5.6)    | 2<br>0.92(1.1-3.3)    | 0.33 (0.19-0.57)                    | 0.49 (0.27-0.87)                |
| 45-54                            | 201<br>31.6 (28.0-35.3) | 83<br>31.0 (25.5-36.9)  | 1.10 (0.80-1.51)                    | 2.11 (1.49-2.98)                | 10<br>1.6 (0.8-2.9)    | 3<br>1.12 (0.2-3.2)   | 0.13 (0.06-0.27)                    | 0.21 (0.10-0.45)                |
| 55-64                            | 113<br>27.3 (23.0-31.9) | 87<br>36.0 (29.9-42.3)  | 1.05 (0.75-1.46)                    | 1.97 (1.37-2.84)                | 6<br>1.5 (0.5-3.1)     | 6<br>2.5 (0.9-5.3)    | 0.17 (0.08-0.36)                    | 0.28 (0.13-0.60)                |
| <b>Relationship status</b>       |                         |                         |                                     |                                 |                        |                       |                                     |                                 |
| Married                          | 358<br>41.8 (38.5-45.1) | 125<br>43.0 (37.4-48.7) | 1.00                                | 1.00                            | 39<br>33.0 (25.1-42.1) | 6<br>31.6 (14.5-55.7) | 1.00                                | 1.00                            |
| Cohabiting                       | 272<br>31.8 (28.7-35.0) | 85<br>29.2 (24.2-34.7)  | 3.19 (2.68-3.80)                    | 3.53 (2.92-4.26)                | 46<br>39.0 (30.5-48.1) | 5<br>26.3 (11.0-50.7) | 3.5 (2.33-5.28)                     | 2.35 (1.51-3.66)                |
| Divorced/separated/<br>broken up | 207<br>24.2 (21.4-27.2) | 69<br>23.7 (19.2-28.9)  | 5.30 (4.30-6.53)                    | 5.00 (4.04-6.20)                | 33<br>28.0 (20.5-36.8) | 7<br>36.9 (18.2-60.5) | 4.63 (2.0-7.17)                     | 3.92 (2.47-6.23)                |
| Widowed                          | 19<br>2.2 (1.4-3.4)     | 12<br>4.1 (2.3-7.1)     | 2.14 (1.36-3.36)                    | 1.87 (1.16-3.00)                | 0                      | 1<br>5.3 (0.7-30.9)   | 0.60 (0.08-4.4)                     | 0.75 (0.10-5.65)                |
| <b>Education Attainment</b>      |                         |                         |                                     |                                 |                        |                       |                                     |                                 |
| Primary and secondary            | 519<br>35.1 (32.3-37.6) | 108<br>34.5(29.2)       | 1.00                                | 1.00                            | 77<br>5.2 (4.1-6.5)    | 7<br>2.2 (0.9-4.5)    | 1.00                                | 1.00                            |
| Tertiary level                   | 332<br>28 (25.4-30.6)   | 182<br>29.1(25.6-32.8)  | 0.73 (0.64-0.84)                    | 0.81 (0.69-0.95)                | 40<br>3.4 (2.4-4.6)    | 12<br>1.9 (1.0-3.3)   | 0.60 (0.42-0.85)                    | 0.73 (0.50-1.06)                |
| <b>Independent income</b>        |                         |                         |                                     |                                 |                        |                       |                                     |                                 |
| No                               | 135<br>24.5 (21.0-28.4) | 75<br>30.4 (24.7-36.5)  | 1.00                                | 1.00                            | 26<br>4.7 (3.1-6.8)    | 5<br>2.0 (0.7-4.7)    | 1.00                                | 1.00                            |
| Yes                              | 720<br>33.9 (31.9-36.0) | 216<br>31.1 (27.6-34.7) | 1.39 (1.16-1.66)                    | 1.17 (0.97-1.41)                | 92<br>4.3 (3.5-5.3)    | 14<br>2.0 (2.1-3.3)   | 0.97 (0.64-1.45)                    | 0.86 (0.55-1.32)                |
| <b>Deprivation level</b>         |                         |                         |                                     |                                 |                        |                       |                                     |                                 |
| Least deprived                   | 224<br>24.5 (21.7-27.4) | 68<br>25.3 (20.2-30.9)  | 1.00                                | 1.00                            | 26<br>2.8 (1.9-4.1)    | 4<br>1.5 (0.4-3.8)    | 1.00                                | 1.00                            |
| Moderately deprived              | 344                     | 113                     | 1.42 (1.20-1.69)                    | 1.28 (1.07-1.53)                | 44                     | 8                     | 1.44 (0.91-2.27)                    | 1.24 (0.77-1.97)                |

1  
2  
3  
4  
5  
6  
7  
8  
9  
10  
11  
12  
13  
14  
15  
16  
17  
18  
19  
20  
21  
22  
23  
24  
25  
26  
27  
28  
29  
30  
31  
32  
33  
34  
35  
36  
37  
38  
39  
40  
41  
42  
43  
44  
45  
46

|                 |                  |                  |                  |                  |               |               |                  |                  |
|-----------------|------------------|------------------|------------------|------------------|---------------|---------------|------------------|------------------|
|                 | 32.9 (30.1-35.9) | 28.7 (24.3-33.5) |                  |                  | 4.2 (3.1-5.6) | 2.0 (0.9-4.0) |                  |                  |
| Mostly deprived | 285              | 110              | 2.03 (1.69-2.44) | 1.60 (1.31-1.96) | 48            | 7             | 2.27 (1.44-3.57) | 1.52 (0.94-2.46) |
|                 | 40.2 (36.6-44.0) | 39.3 (33.5-45.3) |                  |                  | 6.8 (5.0-8.9) | 2.5 (1.0-5.1) |                  |                  |

\*AORs (Adjusted Odds ratios) are adjusted for age, education, relationship status, deprivation level, independent income, and the year of the study

For peer review only

1  
2  
3  
4 *Changes in physical IPV prevalence rates*

5  
6 *Lifetime prevalence.* The lifetime prevalence of physical IPV remained relatively unchanged  
7  
8 between 2003 and 2019, with almost 30% of ever-partnered women aged 18-64 reporting  
9  
10 having experienced at least one episode of physical violence (Table 3). After controlling for  
11  
12 sociodemographic factors, adjusted odds ratios showed no significant difference in the reported  
13  
14 prevalence rates of lifetime physical IPV between the two study years (AOR=0.99;  
15  
16 95%CI=0.82-1.17).

17  
18 *12-month prevalence.* The 12—month prevalence rate of physical IPV decreased from 4.4 %  
19  
20 in 2003 to 2.0% in 2019 (OR=0.44; 95%CI=0.27-0.73). The adjusted odds ratio showed that,  
21  
22 after controlling for sociodemographic factors, the decrease in 12-month physical IPV was  
23  
24 attenuated but still remained significant (AOR=0.53; 95%CI=0.32, 0.89).  
25  
26  
27  
28  
29  
30  
31  
32  
33  
34  
35  
36  
37  
38  
39  
40  
41  
42  
43  
44  
45  
46  
47  
48  
49  
50  
51  
52  
53  
54  
55  
56  
57  
58  
59  
60



Table 3. Characteristics of women with a lifetime and past-12 months **Sexual IPV** in pooled database from two cross-sectional studies in New Zealand

|                                  | Lifetime                |                         | Univariate Model Odds Ratio (95%CI) | *Multivariate Model AOR (95%CI) | Past 12-month          |                      | Univariate Model Odds Ratio (95%CI) | *Multivariate Model AOR (95%CI) |
|----------------------------------|-------------------------|-------------------------|-------------------------------------|---------------------------------|------------------------|----------------------|-------------------------------------|---------------------------------|
|                                  | 2003 n % (95%CI)        | 2019 n % (95%CI)        |                                     |                                 | 2003 n % (95%CI)       | 2019 n % (95%CI)     |                                     |                                 |
| <b>Year (ref=2003)</b>           | 464<br>17.4 (15.9-18.8) | 133<br>14.1 (11.9-16.5) | 0.78<br>(0.63-0.96)                 | 0.78 (0.62-0.98)                | 38<br>1.4 (1.00-1.9)   | 10<br>1.06 (0.5-1.9) | 0.74<br>(0.37-1.50)                 | 0.79 (0.37-1.71)                |
| <b>Age categories</b>            |                         |                         |                                     |                                 |                        |                      |                                     |                                 |
| 18-24                            | 25<br>13.7 (9.0-19.6)   | 5<br>11.1(3.7-24.0)     | 1.00                                | 1.00                            | 8<br>4.4 (1.9-8.5)     | 0<br>0 (0-7.9)       | 1.00                                | 1.00                            |
| 25-34                            | 105<br>18.1 (15.0-21.4) | 18<br>10.7 (6.4-16.3)   | 1.29 (0.84-1.98)                    | 1.87 (1.20-2.91)                | 13<br>2.2 (1.2-3.8)    | 2<br>1.2 (0.1-4.2)   | 0.55 (0.23-1.33)                    | 0.64 (0.26-1.58)                |
| 35-44                            | 154<br>18.0 (15.5-20.7) | 31<br>14.2 (9.9-19.6)   | 1.37 (0.90-2.07)                    | 2.42 (1.56-3.74)                | 10<br>1.2 (0.5-2.1)    | 4<br>1.8 (0.5-4.6)   | 0.36 (0.15-0.87)                    | 0.50 (0.20-1.27)                |
| 45-54                            | 106<br>16.6 (13.8-19.8) | 39<br>14.6 (10.6-19.4)  | 1.25 (0.82-1.91)                    | 2.37 (1.52-3.71)                | 5<br>0.8 (0.2-1.8)     | 2<br>0.8 (0.1-2.7)   | 0.21 (0.07-0.59)                    | 0.31 (0.10-0.92)                |
| 55-64                            | 73<br>17.6 (14.1-21.6)  | 40<br>16.4(12.0-21.6)   | 1.37 (0.88-2.11)                    | 2.59 (1.62-4.12)                | 2<br>0.5 (.05-1.7)     | 2<br>0.8 (0.1-2.9)   | 0.17 (0.05-0.56)                    | 0.21 (0.06-0.78)                |
| <b>Relationship status</b>       |                         |                         |                                     |                                 |                        |                      |                                     |                                 |
| Married                          | 165<br>35.6 (31.3-40)   | 58<br>43.6 (35.4-52.2)  | 1.00                                | 1.00                            | 13<br>34.2 (20.6-51.1) | 5<br>50 (20.7-79.3)  | 1.00                                | 1.00                            |
| Cohabiting                       | 155<br>33.4 (29.2-37.8) | 38<br>28.6 (21.5-36.9)  | 3.06 (2.47-3.80)                    | 3.46 (2.75-4.36)                | 15<br>39.5 (24.9-56.2) | 1<br>10 (1.2-50.9)   | 2.66 (1.34-5.23)                    | 1.59 (0.75-3.36)                |
| Divorced/separated/<br>broken up | 131<br>28.2 (24.3-32.5) | 34<br>25.5 (18.8-33.7)  | 5.00 (3.95-6.32)                    | 4.80 (3.77-6.11)                | 10<br>26.3 (14.4-43.1) | 3<br>30 (9-64.9)     | 3.58 (1.74-7.36)                    | 2.78 (1.31-5.88)                |
| Widowed                          | 13<br>2.2 (1.6-4.8)     | 3<br>2.3 (0.7-6.8)      | 2.14 (1.22-3.75)                    | 1.82 (1.02-3.25)                | -                      | 1<br>10 (1.2-50.9)   | 1.52 (0.20-11.50)                   | 1.71 (0.21-13.72)               |
| <b>Education attainment</b>      |                         |                         |                                     |                                 |                        |                      |                                     |                                 |
| Primary and secondary            | 291<br>19.7 (17.7-21.8) | 54<br>17.1(13.1-21.8)   | 1.00                                | 1.00                            | 25<br>1.7 (1.1-2.5)    | 6<br>1.9 (0.7-4.1)   | 1.00                                | 1.00                            |

|                           |                          |                        |                  |                  |                      |                     |                   |                  |
|---------------------------|--------------------------|------------------------|------------------|------------------|----------------------|---------------------|-------------------|------------------|
| Tertiary level            | 172<br>14.5 (12.5-16.6)  | 78<br>12.5(10.0-15.3)  | 0.67 (0.56-0.80) | 0.77 (0.64-0.94) | 13<br>1.1 (0.5-1.9)  | 3<br>0.5 (0.1-1.4)  | 0.50 (0.27-0.93)  | 0.63 (0.33-1.19) |
| <b>Independent income</b> |                          |                        |                  |                  |                      |                     |                   |                  |
| Yes                       | 388<br>18.3 (16.7-20.0)  | 98<br>14.1 (11.6-16.9) | 1.29 (1.03-1.61) | 1.07 (0.84-1.35) | 28<br>1.3 (0.9-1.9)  | 7<br>1.0 (0.4-2.1)  | 0.76 (0.40-1.44)  | 0.83 (0.41-1.65) |
| No                        | 76<br>13.8 (11.0-17.0)   | 35<br>14.2 (10.1-19.1) | 1.00             | 1.00             | 10<br>1.8 (0.9-3.3)  | 3<br>1.2 (0.2-3.5)  | 1.00              | 1.00             |
| <b>Deprivation level</b>  |                          |                        |                  |                  |                      |                     |                   |                  |
| Least deprived            | 123<br>13.4 (11.3-15.8)  | 32<br>11.9 (8.3-16.4)  | 1.00             | 1.00             | 4<br>0.4 ( 0.1-1.1)  | 2<br>0.7 (0.09-2.6) | 1.00              | 1.00             |
| Moderately deprived       | 181<br>17.3 ( 15.1-19.8) | 48<br>12.2 (9.2-15.9)  | 1.25 (1.01-1.56) | 1.12 (0.89-1.41) | 16<br>1.5 (0.9-2.5)  | 2<br>0.5 (0.06-1.8) | 2.48 (0.98-6.28)  | 2.18 (0.86-5.54) |
| Mostly deprived           | 160<br>22.6 (19.5-25.9)  | 53<br>18.9 (14.5-24.0) | 1.82 (1.45-2.28) | 1.41 (1.10-1.80) | 18<br>2.5 ( 1.5-4.0) | 6<br>2.1 ( 0.8-4.6) | 4.88 (1.99-12.00) | 3.33 (1.31-8.43) |

\* AORs (Adjusted Odds ratios) are adjusted for age, education, relationship status, deprivation level, independent income, and the year of the stud

### *Changes in sexual IPV prevalence rates*

*Lifetime prevalence.* A significant decrease in the reported lifetime prevalence of sexual violence was found in univariate analysis, from 17.4% in 2003 to 14.1% in 2019 (OR= 0.78; 95%CI=0.63-0.96). After controlling for sociodemographic variables, the noted significant decrease in the reported experience of lifetime sexual IPV remained unchanged (AOR=0.78; 95%CI=0.62-0.98).

*12-month prevalence:* No significant differences in the 12-month prevalence rates of sexual IPV between two study years was found in univariate analysis (approximately 1% in both study years) (OR=0.74, 95%CI=0.37-1.50). After controlling for sociodemographic factors, the nonsignificant difference in 12-month sexual IPV between two study years remained unchanged (AOR=0.79; 95%CI=0.37-1.71).

*Past 12-month physical IPV.* At the multivariate level, age and relationship status were significantly associated with reports of experiencing past 12-month physical IPV. A lower proportion of women aged 35 years and older reported experiencing past 12-month physical IPV compared with those younger than 35 years. A higher proportion of those who were cohabiting or divorced compared with those who were married reported this experience (Table 2).

*Lifetime sexual IPV.* At the multivariate level, age, relationship status, education attainment, and area deprivation level were significantly associated with lifetime sexual IPV. Women were more likely to report having experienced lifetime sexual IPV if they were: aged 25 and over; cohabiting, divorced or separated, or widowed; or living in the most deprived areas. Those who had some tertiary education were less likely to report lifetime experience of sexual IPV compared with those with primary or secondary education (Table 3).

### *Past 12-month sexual IPV*

Those who were cohabiting or divorced/separated were more likely to report having experienced 12-month sexual IPV compared to married women. Those living in the most deprived areas were also more likely to report 12-month sexual IPV. Women aged 45 years and above were less likely to report having experienced sexual IPV in the past 12 months compared with younger women (Table 3).

1  
2  
3 There was a significant interaction between relationship status and the study year for reported  
4 lifetime sexual IPV. Fewer women who were not married but were cohabitating reported  
5 experience of lifetime sexual IPV in 2019 (28.6%) compared with 2003 (33.4%) (AOR=0.60,  
6 95%CI= 0.40-0.90) (data not shown). No other interactions were significant for reported 12-  
7 month sexual IPV, or lifetime and 12-month physical IPV.  
8  
9  
10  
11  
12

### 13 *Changes in women's attitudes*

14  
15 In 2003, 47% agreed with at least one of the statements indicating agreement with traditional  
16 gender roles, compared with 35.3% in 2019. While not common in 2003 (3.7%), it was even  
17 less common in 2019 (2.1%) for women to agree with one or more justifications for a man to  
18 hit his wife. This decrease appears to be driven by fewer women agreeing with the statement  
19 that it is acceptable for a man to hit his wife if he finds out she has been unfaithful (3.2%  
20 agreement in 2003, 1.6% agreement in 2019) (Table 4).  
21  
22  
23  
24  
25  
26  
27  
28  
29  
30  
31  
32  
33  
34  
35  
36  
37  
38  
39  
40  
41  
42  
43  
44  
45  
46  
47  
48  
49  
50  
51  
52  
53  
54  
55  
56  
57  
58  
59  
60

Table 4. Prevalence rates and changes in women's attitudes toward traditional gender roles in relationship and attitudes toward acceptability of a man hitting his wife.

| Attitude item                                                                               | Freq<br>% (95%CI)         |                         | Odds ratio<br>(95%CI) | P value |
|---------------------------------------------------------------------------------------------|---------------------------|-------------------------|-----------------------|---------|
|                                                                                             | 2003 (n=2850)             | 2019 (n=1039)           |                       |         |
| <b>Roles of women and men in relationships</b>                                              |                           |                         |                       |         |
| A good wife obeys her husband even if she disagrees                                         | 371<br>13.2 (11.9-14.5)   | 108<br>10.8 (8.9-12.8)  | 0.79 (0.63-0.99)      | 0.049   |
| Family problems should only be discussed with people in the family                          | 1076<br>38.2 (36.3-40.0)  | 274<br>27.1 (24.4-30.0) | 0.60 (0.51-0.70)      | 0.001   |
| It is important for a man to show his partner who is boss                                   | 201<br>7.1 (6.2-8.1)      | 32<br>3.1 (2.1-4.4)     | 0.42 (0.29-0.62)      | 0.001   |
| A woman should be able to choose her own friends even if her husband disapproves (disagree) | 169<br>6.0 (5.1-6.9)      | 66<br>6.5 (5.1-8.2)     | 1.09 (0.81-1.46)      | 0.549   |
| It's a wife obligation to have sex with her husband even if she doesn't feel like           | 216<br>7.6 (6.7-8.7)      | 56<br>5.5 (4.2-7.1)     | 0.71 (0.52-0.96)      | 0.027   |
| At least agreed with one statement                                                          | 1337<br>46.9 (45.0-48.7)  | 365<br>35.3 (32.4-38.3) | 0.62 (0.53-0.71)      | 0.001   |
| <b>Acceptability of a man hitting his wife</b>                                              |                           |                         |                       |         |
| She doesn't complete her household work to his satisfaction                                 | 9<br>0.3 (0.1-0.5)        | 5<br>0.5 (0.1-1.1)      | 1.53 (0.51-4.58)      | 0.4     |
| She disobeys him                                                                            | 18<br>0.6 (0.3-1.0)       | 8<br>0.8 (0.3-1.5)      | 1.22 (0.53-2.83)      | 0.6     |
| She refuses to have sex with him                                                            | 9<br>0.3 (0.1-0.6)        | 5<br>0.5 (0.1-1.1)      | 1.53 (0.51-4.60)      | 0.4     |
| She asks him whether he has other girlfriends                                               | 18<br>0.6 (0.4-1.0)       | 3<br>0.3 (0.05-0.8)     | 0.46 (0.13-1.56)      | 0.2     |
| He suspects that she is unfaithful                                                          | 36<br>1.3 (0.9-1.7)       | 8<br>0.8 (0.3-1.5)      | 0.61 (0.28-1.31)      | 0.2     |
| He finds out she has been unfaithful                                                        | 107<br>3.7 (3.1-4.5)      | 17<br>1.6 (0.9-2.6)     | 0.42 (0.25-0.72)      | 0.001   |
| At least one                                                                                | 107/2748<br>3.7 (3.1-4.5) | 22<br>2.1 (1.3-3.2)     | 0.55 (0.35-0.88)      | 0.014   |

### *Changes in help seeking behaviors*

Overall, there was no difference in the proportion of women who had sought help from formal or informal sources, with three-quarters (75%) of women who had experienced IPV reporting that they had told someone about the violence in both survey years. With one exception, there was no change in usage of 'formal' responders (police, lawyer, court, health and mental health professionals) between the two study years. The exception was the increase in the proportion of women who sought help from community organizations such as women's refuge /NGOs/ women organisations/ or Marae (from 4.6% in 2003 to 7.5% in 2019). However, no significant increase in the reported proportion of women who indicated that they received help from these service providers was found (2003, 4.5%, 2019, 5.7%) (Table 5).

Table 5. Prevalence rates and changes in help sought and received help between 2003 and 2019 (for those who reported at least one type of sexual or physical IPV)

| Source of help                                  |                                                    | <i>Help sought (Who you told about IPV)</i> |                          |                  |         | <i>Who helped you with IPV</i> |                         |                  |         |
|-------------------------------------------------|----------------------------------------------------|---------------------------------------------|--------------------------|------------------|---------|--------------------------------|-------------------------|------------------|---------|
|                                                 |                                                    | 2003 (n=957)                                | 2019 (n=322)             | Odds ratio       | P value | 2003 (n=957)                   | 2019 (n=322)            | Odds ratio       | P value |
| No one                                          |                                                    | 223<br>23.3(20.6- 26.1)                     | 89<br>27.6(22.8-32.9)    | 1.19 (0.89—1.58) | 0.2     | 397<br>41.5 (38.3-44.7)        | 125<br>38.8 (33.5-44.4) | 0.88 (0.68-1.13) | 0.3     |
| Informal sources                                |                                                    | 679<br>70.9 (67.9-73.7)                     | 216<br>67.1 ( 61.6-72.2) | 0.86 (0.65-1.12) | 0.2     | 489<br>51.1 (47.9-54.3)        | 171<br>53.1 (47.5-58.7) | 1.11 (0.86-1.43) | 0.4     |
| Formal sources                                  | police/lawyer/court                                | 132<br>13.8 (11.7-16.1)                     | 49<br>15.2 (11.5-19.6)   | 1.08 (0.76-1.55) | 0.6     | 89<br>9.3 (7.5-11.3)           | 31<br>9.6 (6.6-13.4)    | 1.00 (0.65-1.54) | 0.9     |
|                                                 | Women’s<br>refugee/NGO/women<br>organization/Marae | 44<br>4.6 (3.4 -6.1)                        | 24<br>7.45 (4.8-10.9)*   | 1.70 (1.02-2.81) | 0.04    | 43<br>4.5 (3.3-6.0)            | 19<br>5.7 (3.6-9.1)     | 1.29 (0.74-2.25) | 0.3     |
|                                                 | Health workers                                     | 125<br>13.1 (11-15.4)                       | 40<br>12.4 (9.0-16.5)    | 0.91 (0.63-1.34) | 0.6     | 71<br>7.4 (5.8-9.3)            | 26<br>8.07 (5.3-11.6)   | 1.06 (0.67-1.70) | 0.8     |
|                                                 | Counsellor                                         | 168<br>17.5 (15.2-20.1)                     | 45<br>14 (10.4-18.2)     | 0.74 (0.52-1.05) | 0.09    | 103<br>10.8 (8.9-12.9)         | 37<br>11.5 (8.2-15.5)   | 1.04 (0.70-1.55) | 0.8     |
|                                                 | At least one                                       | 294<br>30.7 (27.8-33.7)                     | 93<br>28.9 (24.0-34.2)   | 0.89 (0.68-1.17) | 0.4     | 203<br>21.2 (18.7-23.9)        | 67<br>20.8 (16.5-25.6)  | 0.94 (0.70-1.28) | 0.7     |
| Religious leader (priest in 2003)/church member |                                                    | 31<br>3.24(2.2-4.5)                         | 4<br>1.2(0.3-3.1)        | 0.36 (0.12-1.04) | 0.4     | 16<br>1.7 (0.9-2.7)            | 5<br>1.5 (0.3-3.1)      | 0.90 (0.32-2.48) | 0.8     |

## Discussion

Using population-based cross-sectional studies conducted in 2003 and 2019, we explored if there were changes in the lifetime and past 12-month prevalence rates of physical and sexual IPV reported by women. We also explored if there were changes in women's agreement with attitudes supportive of traditional gender roles, and attitudes that justified a man hitting his wife. Additionally, changes in help sought and help received by women exposed to IPV were investigated.

Our findings indicated that the lifetime prevalence of physical IPV remained relatively unchanged between 2003 and 2019, with almost one third (30%) of women in both surveys reporting having experienced at least one act of physical IPV in their lifetime. This rate is similar to reported prevalence rates from the EU 28-countries study (33%)<sup>26</sup>, and the USA (30.6%)<sup>27</sup>, and is comparable to the global average<sup>28</sup>. While lifetime prevalence of physical IPV was unchanged, there was a significant decrease in the proportion of women who reported experiencing 12-month physical IPV. Small reductions in rates for lifetime sexual IPV were also observed. Population changes in sociodemographic characteristics did not explain the decreases in IPV prevalence over time.

In 2003, 47% of women agreed one or more of the statements supportive of traditional gender roles, compared with 35.3% in 2019. These were low percentages of agreement compared with women in low- and middle- income countries<sup>29-31</sup>. Agreement with attitudes supportive of justifications for a man hitting his wife was low in both the 2003 (0.3%-3.7%) and 2019 surveys (0.3%-1.6%), and extremely low compared with results reported from low-and middle-income countries<sup>32, 33</sup>, but comparable with high income countries<sup>34</sup>. Even with this low rate of agreement, change was still observed, with a significant reduction in agreement with the statement that it was "acceptable for a man to hit his wife if he found out she was unfaithful", from 3.7% in 2003 to 1.6% in 2019.

Overall, among women who experienced IPV, the rates of disclosure (telling someone about the violence) were high (77% in 2003, 73% in 2019), compared with findings from low- and middle income countries,<sup>35,36</sup> and comparable with high income countries<sup>37</sup>. It should be noted, however, that most disclosures were made to informal sources, such as family or friends. There was a significant increase in seeking help from community organizations such as Women's



1  
2  
3 Refuges and other NGOs (4.6% in 2003, to 7.5% in 2019), but this is still only a minority of  
4 those who have experienced IPV. There was no change in “help received” from formal sources  
5 (21% in 2003, 21% in 2019). This warrants further attention, to determine if this is due to  
6 limited service capacity, or limits in the quality of help currently available.  
7  
8  
9

10  
11 Between 2003 and 2019, a number of actions were undertaken to address family violence.  
12 These included: changes in legislation (e.g. amendments to family violence law), and the  
13 introduction of prevention campaigns and programmes (e.g. the Family Violence: It’s not ok  
14 national campaign<sup>38</sup>, and Accident Compensation Corporation-funded Mates and Dates high  
15 schools programmes on healthy relationships<sup>39</sup>). These actions may have contributed to changes  
16 in societal awareness and understandings of attitudes supportive of violence against women,  
17 an interpretation supported by our findings on the changes in agreement with attitudes toward  
18 traditional gender roles and the non-acceptability of a man hitting his wife under difference  
19 circumstances. An additional feature of these actions was the call for those experiencing  
20 violence to reach out for help.<sup>38</sup> Our findings suggest that more women agreed that family  
21 problems could be discussed with outside help, and that more women who experienced IPV  
22 did contact refuges and other community organisations. However, this was still a very small  
23 minority (7.5%) of those who experienced IPV, which indicates that the majority of women  
24 are still not accessing specialised help for these experiences.  
25  
26  
27  
28  
29  
30  
31  
32  
33  
34  
35  
36  
37

38 The observed reduction in 12-month prevalence of physical IPV is positive, and parallels  
39 overall reductions in crime rates reported by crime and victimisation surveys<sup>40</sup>, and is similar  
40 to reductions in prevalence of IPV documented in Australia between 1996 and 2005<sup>41</sup>. It may  
41 be the result of more women recognising abusive behaviour and taking their own actions to  
42 leave abusive relationships. However, further efforts and investment are needed to ensure that  
43 those who ask for help actually receive help. There is a currently a gap between those who ask  
44 and those who indicate that helpful responses were forthcoming. However, the stability of the  
45 lifetime prevalence of physical IPV reinforces the need for comprehensive and sustained  
46 prevention work with those who use violence in relationships.  
47  
48  
49  
50  
51  
52  
53  
54

### 55 ***Strengths***

56 Strengths include: the representativeness of the samples obtained, and the use of comparable  
57 methods and comparable questions across the two survey waves. Additionally, the 15 year time  
58 gap between the two survey waves is sufficient to determine if real change occurred<sup>12</sup>.  
59  
60

### ***Limitations***

Changes between two time points are not sufficient to determine if the change represents a trend, so caution is needed when interpreting the changes observed. Overall, the prevalence estimate obtained may be under-reports of what is happening in the population as a whole, either because of stigma<sup>42</sup>, or because of the overall response rate for the study. While we successfully surveyed over 60% of eligible women, those with greater levels of exposure to violence may be less likely to have participated.

### ***Conclusion***

The observed reduction in 12-month physical and lifetime sexual IPV prevalence rates, changes in attitudes about the acceptability of violence, and the increases in help seeking are positive. However, work is still needed to address the substantial problem of IPV, as the lifetime prevalence rate of 1 in 3 women experiencing IPV remained stable over the 15-year time interval. This means that prevention efforts must be increased and sustained, and that adequate structures and resources must be available to respond to those seeking help.

### ***Acknowledgements***

We gratefully acknowledge participants, the interviewers, and the study project team, led by Patricia Meagher-Lundberg. We also acknowledge the representatives from the Ministry of Justice, the Accident Compensation Corporation, the New Zealand Police, and the Ministry of Education, who were part of the Governance Group for Family and Sexual Violence at the inception of the study. The two cross-sectional studies from which this study used data are based on the WHO Violence Against Women Instrument as developed for use in the WHO Multi-Country Study on Women's Health and Domestic Violence and has been adapted from the version used in Asia and the Pacific by kNOwVAWdata (Version 12.03).

Contributors: Janet Fanslow (JF), Pauline Gulliver (PG), contributed to the conception and design of the study. Tracey McIntosh (TM) contributed to the application for funding of 2019 study. Ladan Hashemi (LH) managed the data cleaning, and conducted the analyses, with contributions from Zarintaj Malihi (ZM). LH, JF and PG interpreted the data, drafted the article and revised it. All authors contributed to the manuscript and approved the final version.

Ethics approval was granted by the University of Auckland Human Participants Ethics Committee in 2003 (Ref number: 2002/199) and 2019 (Reference number 2015/ 018244).

Data availability statement Data are unavailable due to the confidentiality and sensitivity of the data and Māori data sovereignty.

Competing interests hereby we confirm that all authors read and understood BMJ policy on declaration of interests and have completed the ICMJE uniform disclosure form at [http://www.icmje.org/coi\\_disclosure.pdf](http://www.icmje.org/coi_disclosure.pdf) and declare that we received: no support from any organisation for the submitted work (or describe if any); no financial relationships with any organisations that might have an interest in the submitted work in the previous three years.

1. United Nations, *Secretary-General's in-depth study on all forms of violence against women, in Report of the Secretary-General*. 2006: U.N. document A/61/122/Add.1.
2. Kangaspunta, K. and I.H. Marshall, *Trends in Violence against Women: Some Good News and Some Bad News*, in *The International Crime Drop*, A.T. Jan van Dijk, Graham Farrell, Editor. 2012, Palgrave Macmillan: London. p. 103-155.
3. Gulliver, P. and J. Fanslow, *Measurement of family violence at a population level: : What might be needed to develop reliable and valid family violence indicators?* 2012, New Zealand Family Violence Clearinghouse: New Zealand.
4. Powers, R.A. and C.E. Kaukinen, *Trends in Intimate Partner Violence: 1980-2008*. *Journal of Interpersonal Violence*, 2012. **27**(15): p. 3072-3090.
5. Orr, C., et al., *Trends in Hospital Admissions for Intimate Partner Violence in Australian Mothers With Children Born From 1990 to 2009*. *Journal of Interpersonal Violence*, 2019: p. 0886260519832905.
6. United Nations, *The World's Women 2010: Trends and Statistics*, in *UN Stats*. 2010.
7. Tjaden, P. and N. Thoennes, *Prevalence, Incidence, and Consequences of Violence Against Women: Findings From the National Violence Against Women Survey*. 1998, U.S. Department of Justice, Office of Justice Programs, National Institute of Justice: Washington, U.S.A.
8. Canada, S., *The violence against women survey. Highlights*, in *Dly Stat Can*. 1993: Canada. p. 1-9.
9. Mouzos, J. and T. Makkai, *Women's Experiences of Male Violence: Findings from the Australian Component of the International Violence Against Women Survey (IVAWS)*, R.a.P.P. Series, Editor. 2004, Australian Institute of Criminology: Australia. p. 162.
10. FRA, *Violence against women: an EU-wide survey*. 2014, European Union Agency for Fundamental Rights: Luxembourg: Publications Office of the European Union.
11. Heiskanen, M. and M. Piispa, *Faith, Hope, Battering: A Survey of Men's Violence Against Women in Finland*. 1998, Helsinki: Yliopistopaino
12. Heiskanen, M. and M. Piispa. *Violence against Women in Finland. Results from Two National Victimisation Surveys*. in *VICTIMISATION SURVEYS IN COMPARATIVE PERSPECTIVE 2007*. Stockholm: European Institute for Crime Prevention and Control, affiliated with the United Nations (HEUNI) P.O.Box 444 FIN-00531 Helsinki Finland.
13. Fanslow, J.L.R., E.M., *Violence against women in New Zealand: Prevalence and health consequences*. *New Zealand Medical Journal* 2004. **117**(1206).
14. Dahlberg, L.L. and E.G. Krug. *Violence a global public health problem 2006* [cited 11; 277-292]. Available from: [http://www.scielo.br/scielo.php?script=sci\\_arttext&pid=S1413-81232006000200007&nrm=iso](http://www.scielo.br/scielo.php?script=sci_arttext&pid=S1413-81232006000200007&nrm=iso).
15. Heise, L.L., *Violence Against Women: An Integrated, Ecological Framework*. 1998. **4**(3): p. 262-290.

16. Kim, J.Y., S. Oh, and S.I. Nam, *Prevalence and Trends in Domestic Violence in South Korea: Findings From National Surveys*. Journal of Interpersonal Violence, 2015. **31**(8): p. 1554-1576.
17. Dawson, M., V.P. Bunge, and T. Balde, *National Trends in Intimate Partner Homicides: Explaining Declines in Canada, 1976 to 2001*. Violence Against Women, 2009. **15**(3): p. 276-306.
18. Hindin, M.J., *Understanding women's attitudes towards wife beating in Zimbabwe / Michelle J. Hindin*. Bulletin of the World Health Organization : the International Journal of Public Health 2003 ; **81**(7) : 501-508, 2003.
19. Koenig, M.A., et al., *Individual and contextual determinants of domestic violence in North India*. American journal of public health, 2006. **96**(1): p. 132-138.
20. World Health, O., *Changing cultural and social norms that support violence*. 2009, World Health Organization: Geneva.
21. Donovan, R.J., D. Paterson, and M. Francas, *Targeting male perpetrators of intimate partner violence: Western Australia's "Freedom from Fear" campaign*. Soc Mar Q, 1999. **5**(3): p. 128-44.
22. Usdin, S., et al., *Achieving social change on gender-based violence: a report on the impact evaluation of Soul City's fourth series*. Soc Sci Med, 2005. **61**(11): p. 2434-45.
23. WHO, *Putting women first: ethical and safety recommendations for research on domestic violence against women*. 2001, Department of Gender and Women's Health, Family and Community Health, World Health Organization: Geneva, Switzerland.
24. Core Technical Team, W.M.-c.S.o.V.A.W., *WHO MultiCountry Study on Violence Against Women, Questionnaire, Version 10*. 2003, WHO: Gender and Health Department.
25. StataCorp, *Stata Statistical Software: Release 15*. College Station, TX: StataCorp LLC. 2017.
26. Goodey, J., *Violence Against Women: Placing Evidence From a European Union–Wide Survey in a Policy Context*. Journal of Interpersonal Violence, 2017. **32**(12): p. 1760-1791.
27. Smith, S.G., Zhang, X., Basile, K.C., Merrick, M.T., Wang, J., Kresnow, M., Chen, J. , *National Intimate Partner and Sexual Violence Survey: 2015 Data Brief – Updated Release*. 2018, National Center for Injury Prevention and Control, Centers for Disease Control and Prevention: Atlanta, Georgia.
28. WHO, *Global and regional estimates of violence against women: prevalence and health effects of intimate partner violence and non-partner sexual violence*. 2013, World Health Organization: Italy.
29. Jayatilleke, A., et al., *Wives' Attitudes Toward Gender Roles and Their Experience of Intimate Partner Violence by Husbands in Central Province, Sri Lanka*. 2011. **26**(3): p. 414-432.
30. Hayati, E.N., et al., *Behind the silence of harmony: risk factors for physical and sexual violence among women in rural Indonesia*. BMC Women's Health, 2011. **11**: p. 52.
31. Black, E., et al., *Prevalence and correlates of intimate partner violence against women in conflict affected northern Uganda: a cross-sectional study*. Conflict and Health, 2019. **13**(1): p. 35.
32. Khan, M.N. and M.M. Islam, *Women's attitude towards wife-beating and its relationship with reproductive healthcare seeking behavior: A countrywide population survey in Bangladesh*. PloS one, 2018. **13**(6): p. e0198833-e0198833.
33. Hindin, M.J., *Understanding women's attitudes towards wife beating in Zimbabwe*. Bull World Health Organ, 2003. **81**(7): p. 501-8.
34. VicHealth, *Australians' attitudes to violence against women*. 2014, Victorian Health Promotion Foundation: Australia.
35. Leonardsson, M. and M. San Sebastian, *Prevalence and predictors of help-seeking for women exposed to spousal violence in India – a cross-sectional study*. BMC Women's Health, 2017. **17**(1): p. 99.

- 1  
2  
3 36. Linos, N., et al., *Predictors of help-seeking behaviour among women exposed to violence in Nigeria: a multilevel analysis to evaluate the impact of contextual and individual factors*. J Epidemiol Community Health, 2014. **68**(3): p. 211-7.
- 4  
5  
6 37. Ansara, D.L. and M.J. Hindin, *Formal and informal help-seeking associated with women's and men's experiences of intimate partner violence in Canada*. Social Science & Medicine, 2010. **70**(7): p. 1011-1018.
- 7  
8  
9 38. Roguski, M., *'It's not OK' Campaign Community Evaluation Project 2015*, New Zealand Ministry of Social Development: New Zealand.
- 10  
11  
12 39. Duncan, A. and V. Kingi, *Evaluation of ACC's Mates and Dates: school-based healthy relationships primary prevention programme pilot*. 2015, Wellington, New Zealand: Lighthouse Consulting New Zealand.
- 13  
14  
15 40. Mayhew, P., *The Case of Australia and New Zealand*. , in *The International Crime Drop -2012 New Directions in Research*, J.v.D.A.T.G. Farrell, Editor. 2012, Palgrave Macmillan, a division of Macmillan Publishers Limited 2012. p. 76-102.
- 16  
17  
18 41. ABS, *Personal Safety, Australia, Changes in prevalence of partner violence over time*. 2012.
- 19  
20 42. Gracia, E., *Unreported cases of domestic violence against women: towards an epidemiology of social silence, tolerance, and inhibition*. Journal of epidemiology and community health, 2004. **58**(7): p. 536-537.
- 21  
22  
23 43. Exeter, D.J., et al., *The New Zealand Indices of Multiple Deprivation (IMD): A new suite of indicators for social and health research in Aotearoa, New Zealand*. PLoS ONE, 2017. **12**: p. e0181260.
- 24  
25  
26  
27  
28  
29  
30  
31  
32  
33  
34  
35  
36  
37  
38  
39  
40  
41  
42  
43  
44  
45  
46  
47  
48  
49  
50  
51  
52  
53  
54  
55  
56  
57  
58  
59  
60

Supplementary Table 1. Definition of lifetime and past 12-month physical and sexual IPV, sociodemographic factors, attitude toward violence against women and gender roles, and help seeking behaviours in 2003 and 2019 surveys

| Variable                                       | Definition                                                                                                                                                                                                                                                                                                                                                                                                                              |
|------------------------------------------------|-----------------------------------------------------------------------------------------------------------------------------------------------------------------------------------------------------------------------------------------------------------------------------------------------------------------------------------------------------------------------------------------------------------------------------------------|
| <b>Ever-partnered</b>                          | If they had ever been married, ever lived with, or were currently with a regular sexual partner.                                                                                                                                                                                                                                                                                                                                        |
| <b>Lifetime Physical IPV</b>                   | Participants were categorised as experiencing lifetime physical IPV if they reported having experienced one or more of the following moderate or severe acts of physical violence.<br><br><b>Moderate:</b> Have been slapped or had something thrown at or have been pushed, shoved, or had their hair pulled<br><br><b>Severe:</b> Have been kicked, dragged, beaten up, hit with fist or something else, choked or burnt              |
| <b>12-Month Physical IPV</b>                   | Participants were categorised as experiencing 12-month physical IPV if they reported having experienced one or more acts of the physical IPV in the last 12 months prior to the data collection                                                                                                                                                                                                                                         |
| <b>Sexual IPV</b>                              | Participants were categorised as experiencing lifetime sexual IPV if they reported having experienced one or more of the following acts: being physically forced to have sexual intercourse when the woman did not want to; having sexual intercourse because she was afraid of what her partner might do or being forced to do something sexual that she found degrading or humiliating.                                               |
| <b>12-Month Sexual IPV</b>                     | Participants were categorised as experiencing 12-month sexual IPV if they reported having experienced one or more acts of the sexual IPV in the last 12 months prior to the data collection                                                                                                                                                                                                                                             |
| <b>Independent source of income</b>            | Have access to income from wages or investments, retirement income (yes or no).                                                                                                                                                                                                                                                                                                                                                         |
| <b>Deprivation level</b>                       | Taken from NZ index of multiple deprivation (IMD) <sup>44</sup> which used a combination of routinely collected data from government departments and census data in seven domains (i.e. employment, income, crime, housing, health, education, and access to services) to develop a measure of deprivation at the neighborhood level. Participants were classified in three groups: living in least, moderately and most deprived area. |
| <b>Attitudes toward a man hitting his wife</b> | Participant opinion on six conditions under which hitting or beating one's wife was considered justified : she doesn't complete her household work to his satisfaction; she disobeys him; she refuses to have sex with him; she ask him whether he has other girlfriends; he suspects that she is unfaithful; he finds out that she has been unfaithful. Response options were yes and no.                                              |
| <b>Attitudes toward gender roles</b>           | Participant's attitude about acceptable behaviour for men and women in relationships, and views on family issues being made public: A good wife obeys her husband even if she disagrees; family problems should only be discussed with people in the family; it is important for a man to show his partner who is boss; a woman should be able to choose her own friends even                                                           |

|                              |                                                                                                                                                                                                        |
|------------------------------|--------------------------------------------------------------------------------------------------------------------------------------------------------------------------------------------------------|
|                              | if her husband disapproves; it is a wife's obligation to have sex with her husband even if she doesn't feel like it                                                                                    |
| <b>Formal help-seeking</b>   | Contact with service agencies including: police, lawyers, courts, health professionals and mental health workers, or NGOs and community based service providers, including Women's Refuges, and Marae. |
| <b>Informal help seeking</b> | Support from family, friends, neighbours, or workmates.                                                                                                                                                |

For peer review only

**STROBE 2007 (v4) checklist of items to be included in reports of observational studies in epidemiology\***  
**Checklist for cohort, case-control, and cross-sectional studies (combined)**

| Section/Topic             | Item # | Recommendation                                                                                                                                                                                                                                                                                                                                                                                                                                                         | Reported on page #     |
|---------------------------|--------|------------------------------------------------------------------------------------------------------------------------------------------------------------------------------------------------------------------------------------------------------------------------------------------------------------------------------------------------------------------------------------------------------------------------------------------------------------------------|------------------------|
| Title and abstract        | 1      | (a) Indicate the study's design with a commonly used term in the title or the abstract                                                                                                                                                                                                                                                                                                                                                                                 | 1                      |
|                           |        | (b) Provide in the abstract an informative and balanced summary of what was done and what was found                                                                                                                                                                                                                                                                                                                                                                    | 1                      |
| <b>Introduction</b>       |        |                                                                                                                                                                                                                                                                                                                                                                                                                                                                        |                        |
| Background/rationale      | 2      | Explain the scientific background and rationale for the investigation being reported                                                                                                                                                                                                                                                                                                                                                                                   | 2-4                    |
| Objectives                | 3      | State specific objectives, including any pre-specified hypotheses                                                                                                                                                                                                                                                                                                                                                                                                      | 4                      |
| <b>Methods</b>            |        |                                                                                                                                                                                                                                                                                                                                                                                                                                                                        |                        |
| Study design              | 4      | Present key elements of study design early in the paper                                                                                                                                                                                                                                                                                                                                                                                                                | 4                      |
| Setting                   | 5      | Describe the setting, locations, and relevant dates, including periods of recruitment, exposure, follow-up, and data collection                                                                                                                                                                                                                                                                                                                                        | 4-5                    |
| Participants              | 6      | (a) <i>Cohort study</i> —Give the eligibility criteria, and the sources and methods of selection of participants. Describe methods of follow-up<br><i>Case-control study</i> —Give the eligibility criteria, and the sources and methods of case ascertainment and control selection. Give the rationale for the choice of cases and controls<br><i>Cross-sectional study</i> —Give the eligibility criteria, and the sources and methods of selection of participants | 4-5                    |
|                           |        | (b) <i>Cohort study</i> —For matched studies, give matching criteria and number of exposed and unexposed<br><i>Case-control study</i> —For matched studies, give matching criteria and the number of controls per case                                                                                                                                                                                                                                                 | NA                     |
| Variables                 | 7      | Clearly define all outcomes, exposures, predictors, potential confounders, and effect modifiers. Give diagnostic criteria, if applicable                                                                                                                                                                                                                                                                                                                               | 6, Supplementary table |
| Data sources/ measurement | 8*     | For each variable of interest, give sources of data and details of methods of assessment (measurement). Describe comparability of assessment methods if there is more than one group                                                                                                                                                                                                                                                                                   | 6, Supplementary table |
| Bias                      | 9      | Describe any efforts to address potential sources of bias                                                                                                                                                                                                                                                                                                                                                                                                              | 7                      |
| Study size                | 10     | Explain how the study size was arrived at                                                                                                                                                                                                                                                                                                                                                                                                                              | 5                      |
| Quantitative variables    | 11     | Explain how quantitative variables were handled in the analyses. If applicable, describe which groupings were chosen and why                                                                                                                                                                                                                                                                                                                                           | 6-7                    |
| Statistical methods       | 12     | (a) Describe all statistical methods, including those used to control for confounding                                                                                                                                                                                                                                                                                                                                                                                  | 6-7                    |
|                           |        | (b) Describe any methods used to examine subgroups and interactions                                                                                                                                                                                                                                                                                                                                                                                                    | 6-7                    |
|                           |        | (c) Explain how missing data were addressed                                                                                                                                                                                                                                                                                                                                                                                                                            | 7                      |
|                           |        | (d) <i>Cohort study</i> —If applicable, explain how loss to follow-up was addressed<br><i>Case-control study</i> —If applicable, explain how matching of cases and controls was addressed                                                                                                                                                                                                                                                                              | NA                     |



|                          |     |                                                                                                                                                                                                              |                     |
|--------------------------|-----|--------------------------------------------------------------------------------------------------------------------------------------------------------------------------------------------------------------|---------------------|
|                          |     | <i>Cross-sectional study</i> —If applicable, describe analytical methods taking account of sampling strategy                                                                                                 |                     |
|                          |     | (e) Describe any sensitivity analyses                                                                                                                                                                        | NA                  |
| <b>Results</b>           |     |                                                                                                                                                                                                              |                     |
| Participants             | 13* | (a) Report numbers of individuals at each stage of study—eg numbers potentially eligible, examined for eligibility, confirmed eligible, included in the study, completing follow-up, and analysed            | 4-5                 |
|                          |     | (b) Give reasons for non-participation at each stage                                                                                                                                                         | 4-5                 |
|                          |     | (c) Consider use of a flow diagram                                                                                                                                                                           |                     |
| Descriptive data         | 14* | (a) Give characteristics of study participants (eg demographic, clinical, social) and information on exposures and potential confounders                                                                     | Page 5, Table 1     |
|                          |     | (b) Indicate number of participants with missing data for each variable of interest                                                                                                                          |                     |
| Outcome data             | 15* | <i>Cohort study</i> —Report numbers of outcome events or summary measures over time                                                                                                                          | NA                  |
|                          |     | <i>Case-control study</i> —Report numbers in each exposure category, or summary measures of exposure                                                                                                         | NA                  |
|                          |     | <i>Cross-sectional study</i> —Report numbers of outcome events or summary measures                                                                                                                           | Table 2 & Table 3   |
| Main results             | 16  | (a) Give unadjusted estimates and, if applicable, confounder-adjusted estimates and their precision (eg, 95% confidence interval). Make clear which confounders were adjusted for and why they were included | Table 2 and Table 3 |
|                          |     | (b) Report category boundaries when continuous variables were categorized                                                                                                                                    | NA                  |
|                          |     | (c) If relevant, consider translating estimates of relative risk into absolute risk for a meaningful time period                                                                                             | NA                  |
| Other analyses           | 17  | Report other analyses done—eg analyses of subgroups and interactions, and sensitivity analyses                                                                                                               | NA                  |
| <b>Discussion</b>        |     |                                                                                                                                                                                                              |                     |
| Key results              | 18  | Summarise key results with reference to study objectives                                                                                                                                                     | 19                  |
| Limitations              | 19  | Discuss limitations of the study, taking into account sources of potential bias or imprecision. Discuss both direction and magnitude of any potential bias                                                   | 21                  |
| Interpretation           | 20  | Give a cautious overall interpretation of results considering objectives, limitations, multiplicity of analyses, results from similar studies, and other relevant evidence                                   | 20                  |
| Generalisability         | 21  | Discuss the generalisability (external validity) of the study results                                                                                                                                        | 19                  |
| <b>Other information</b> |     |                                                                                                                                                                                                              |                     |
| Funding                  | 22  | Give the source of funding and the role of the funders for the present study and, if applicable, for the original study on which the present article is based                                                | 2                   |

\*Give information separately for cases and controls in case-control studies and, if applicable, for exposed and unexposed groups in cohort and cross-sectional studies.

**Note:** An Explanation and Elaboration article discusses each checklist item and gives methodological background and published examples of transparent reporting. The STROBE checklist is best used in conjunction with this article (freely available on the Web sites of PLoS Medicine at <http://www.plosmedicine.org/>, Annals of Internal Medicine at <http://www.annals.org/>, and Epidemiology at <http://www.epidem.com/>). Information on the STROBE Initiative is available at [www.strobe-statement.org](http://www.strobe-statement.org).

# BMJ Open

## Change in prevalence rates of physical and sexual intimate partner violence against women: Data from two cross-sectional studies in New Zealand, 2003 and 2019.

|                                 |                                                                                                                                                                                                                                                                                                                                                                                                                                                                                                                                                                                                         |
|---------------------------------|---------------------------------------------------------------------------------------------------------------------------------------------------------------------------------------------------------------------------------------------------------------------------------------------------------------------------------------------------------------------------------------------------------------------------------------------------------------------------------------------------------------------------------------------------------------------------------------------------------|
| Journal:                        | <i>BMJ Open</i>                                                                                                                                                                                                                                                                                                                                                                                                                                                                                                                                                                                         |
| Manuscript ID                   | bmjopen-2020-044907.R1                                                                                                                                                                                                                                                                                                                                                                                                                                                                                                                                                                                  |
| Article Type:                   | Original research                                                                                                                                                                                                                                                                                                                                                                                                                                                                                                                                                                                       |
| Date Submitted by the Author:   | 04-Feb-2021                                                                                                                                                                                                                                                                                                                                                                                                                                                                                                                                                                                             |
| Complete List of Authors:       | Fanslow, Janet; The University of Auckland Faculty of Medical and Health Sciences, School of Population Health<br>Hashemi, Ladan; The University of Auckland Faculty of Medical and Health Sciences, School of Population Health<br>Malihi, Zarintaj; The University of Auckland Faculty of Medical and Health Sciences, School of Population Health<br>Gulliver, Pauline; The University of Auckland Faculty of Medical and Health Sciences, School of Population Health<br>McIntosh, Tracey; The University of Auckland Faculty of Arts, School of Māori Studies and Pacific Studies, Faculty of Arts |
| <b>Primary Subject Heading</b>: | Public health                                                                                                                                                                                                                                                                                                                                                                                                                                                                                                                                                                                           |
| Secondary Subject Heading:      | Epidemiology                                                                                                                                                                                                                                                                                                                                                                                                                                                                                                                                                                                            |
| Keywords:                       | EPIDEMIOLOGY, PUBLIC HEALTH, SOCIAL MEDICINE                                                                                                                                                                                                                                                                                                                                                                                                                                                                                                                                                            |
|                                 |                                                                                                                                                                                                                                                                                                                                                                                                                                                                                                                                                                                                         |

SCHOLARONE™  
Manuscripts



I, the Submitting Author has the right to grant and does grant on behalf of all authors of the Work (as defined in the below author licence), an exclusive licence and/or a non-exclusive licence for contributions from authors who are: i) UK Crown employees; ii) where BMJ has agreed a CC-BY licence shall apply, and/or iii) in accordance with the terms applicable for US Federal Government officers or employees acting as part of their official duties; on a worldwide, perpetual, irrevocable, royalty-free basis to BMJ Publishing Group Ltd ("BMJ") its licensees and where the relevant Journal is co-owned by BMJ to the co-owners of the Journal, to publish the Work in this journal and any other BMJ products and to exploit all rights, as set out in our [licence](#).

The Submitting Author accepts and understands that any supply made under these terms is made by BMJ to the Submitting Author unless you are acting as an employee on behalf of your employer or a postgraduate student of an affiliated institution which is paying any applicable article publishing charge ("APC") for Open Access articles. Where the Submitting Author wishes to make the Work available on an Open Access basis (and intends to pay the relevant APC), the terms of reuse of such Open Access shall be governed by a Creative Commons licence – details of these licences and which [Creative Commons](#) licence will apply to this Work are set out in our licence referred to above.

Other than as permitted in any relevant BMJ Author's Self Archiving Policies, I confirm this Work has not been accepted for publication elsewhere, is not being considered for publication elsewhere and does not duplicate material already published. I confirm all authors consent to publication of this Work and authorise the granting of this licence.

1  
2  
3 **Change in prevalence rates of physical and sexual intimate partner violence against**  
4 **women: Data from two cross-sectional studies in New Zealand, 2003 and 2019**  
5  
6

7 Janet Fanslow, <sup>a</sup> Ladan Hashemi, <sup>a</sup> Zarintaj Malihi <sup>a</sup>, Pauline Gulliver,<sup>a</sup> and Tracey McIntosh<sup>b</sup>

8  
9 <sup>a</sup> *Social and Community Health, School of Population Health, Faculty of Medical and Health*  
10 *Sciences, University of Auckland, Auckland, New Zealand*  
11

12 <sup>b</sup> *School of Māori Studies and Pacific Studies, Faculty of Arts, University of Auckland,*  
13 *Auckland, New Zealand*  
14

15  
16  
17  
18 \*Corresponding Author:  
19 Janet L. Fanslow  
20

21  
22 Social and Community Health  
23 School of Population Health  
24 University of Auckland  
25 Private Bag 92019  
26 Auckland, 1142  
27 Auckland, New Zealand  
28

29  
30 [j.fanslow@auckland.ac.nz](mailto:j.fanslow@auckland.ac.nz)  
31  
32

33  
34 word count=3817  
35  
36

37  
38 keywords: change, prevalence rates, intimate partner violence, help-seeking, attitudes.  
39  
40  
41  
42  
43  
44  
45  
46  
47  
48  
49  
50  
51  
52  
53  
54  
55  
56  
57  
58  
59  
60

## Change in prevalence rates of physical and sexual intimate partner violence against women: Data from two cross-sectional studies in New Zealand, 2003 and 2019

### Abstract

**Objectives:** To explore changes in reported prevalence of physical and sexual intimate partner violence (IPV) between 2003 and 2019. The impact of socio-demographic differences between the two samples and between group differences were also examined. Changes in attitudes supportive of violence and in help-seeking behaviour following disclosure were also explored.

**Design:** Two cross-sectional studies

**Setting and participants:** Cross-sectional studies on family violence conducted in New Zealand in 2003 and 2019. Ever-partnered female respondents aged 18-64 years old were included (2003 n=2,674, 2019 n=944).

**Main outcome measures:** Prevalence rates of lifetime and past 12-month physical and sexual IPV, attitudes towards gender roles and acceptability of a man hitting his wife, help sought, and received following disclosure were compared between the study years.

**Results:** Lifetime prevalence of physical IPV was unchanged between 2003 and 2019 (AOR=0.89; 95% CI=0.73-1.08). There was a significant decrease in the proportion of women who reported experiencing 12-month physical IPV (AOR=0.53; 95% CI=0.29-0.97). Small reductions in rates for lifetime sexual IPV were also observed (AOR=0.74; 95%CI=0.59-0.95). In 2019, fewer women agreed with one or more statements supportive of traditional gender roles (48.1%; 95% CI= 45.7-50.5 in 2003; 38.4.3% (95% CI=33.8-43.2 in 2019). A significant decrease was noted in the proportion of women who sought help from informal sources (from 71.3% [95% CI= 68.1-74.2] in 2003 to 64.6% [95% CI= 58.7-70.1] in 2019). No significant changes in seeking help from formal sources, or perceived helpfulness from any source were noted.

**Conclusion:** While the reduction in 12-month physical and lifetime sexual IPV are positive, prevention efforts need to be established, maintained and strengthened to address the substantial lifetime prevalence of IPV. Efforts to strengthen responses from formal and informal sources continue to be needed.

### Strengths and limitations of this study

- The current investigation used large, representative samples of women from population-based surveys in 2003 and 2019.
- Regular and comparable surveys of violence exposure, agreement to attitudes supportive of violence and help-seeking behaviours provide an understanding of the effectiveness of population-based policies and programmes.
- True prevalence estimates may be higher in both surveys as it is expected that women in severely abusive relationships would be unable or unwilling to participate.
- Observed changes may reflect societal changes or environmental factors not considered in this investigation.
- Regular and comparable surveys of violence exposure are required to determine if the observed changes are sustained and represent a trend.

### Introduction

Intimate Partner Violence (IPV) has been reported by the UN Secretary-General (2006) as “the most common form of violence experienced by women globally.”<sup>1</sup> IPV includes physical and sexual violence, as well as psychological abuse, controlling behaviour and economic abuse.

Efforts to respond to IPV in high income countries include the introduction of legislation or national action plans, and strengthening the non-for-profit sector to respond to the violence experienced.<sup>2</sup> However, the effectiveness of these strategies is not clear, as there is a lack of consistent and reliable data available to monitor changes in the prevalence of IPV over time.

The limited research available tends to rely on analysis of IPV homicide data, or other forms of administrative data from agencies such as health providers, police or courts.<sup>2</sup> While providing useful insights, these data do not reflect the magnitude of the problem at the population level, as many who experience IPV frequently do not present to services, or the underlying cause of their presentation may not be identified or recorded.<sup>2, 3</sup>

Other attempts to measure changes in IPV occurrence over time have relied on data from general crime victimisation surveys,<sup>4</sup> but the overall framing of these questionnaires (i.e., surveys about ‘crime’) tends to lower the reporting of the violent behaviours within intimate relationships.<sup>2, 3</sup> Surveys conducted for other purposes (e.g., health surveys) which include a dedicated module on family violence provide some information, but can also be problematic,

1  
2  
3 as space limitations for specific modules means that they might not be able to include questions  
4 that canvas the full range of violent experiences.<sup>5</sup>

6 The emerging consensus is that ‘population-based stand-alone surveys are the instruments of  
7 choice’ for collecting statistics on violence against women.<sup>6</sup> To date, specific violence against  
8 women surveys have been carried out in several high-income countries (for examples U.S.A.,<sup>7</sup>  
9 Canada,<sup>8</sup> Australia,<sup>9</sup> European Union,<sup>10</sup> Finland,<sup>11, 12</sup> Spain,<sup>13</sup> New Zealand<sup>14</sup>). However, with  
10 an exception of Australia and Finland, the surveys have generally been one-off efforts and thus  
11 do not allow for time-related comparisons. Without regular, comparable surveys, it is not  
12 possible to determine if there are overall changes in the occurrence of IPV, or if there are  
13 differential patterns of change for specific sub-groups within the population.

14 According to the World Health Organization, violence results from the complex interplay  
15 between individual, relationship, social, cultural and environmental factors.<sup>15</sup> The ecological  
16 model has been important in helping determine risk and protective factors associated with  
17 violence occurrence, but also holds promise for prevention, as it carries the assumption that  
18 changes in contributing factors can potentially lead to changes in prevalence.<sup>16</sup> To date, the  
19 limited research that has explored differences in the prevalence of IPV over time has suggested  
20 that population-level changes in demographic factors, such as shifts in age, education,  
21 relationship status, and socio-economic factors may contribute to the observed prevalence  
22 changes.<sup>4, 6, 17, 18</sup> However, changes in environmental and social norms that may condone or  
23 help perpetuate violence, and associated effects on violence occurrence have received scant  
24 attention in the research.

1  
2  
3  
4  
5  
6  
7  
8  
9  
10  
11  
12  
13  
14  
Community-level norms, such as acceptance of ‘traditional’ gender roles and beliefs in the justification of ‘circumstances in which it is acceptable for a man to hit his wife’ are associated with perpetration of IPV.<sup>19</sup> In some countries, women’s acceptance of these attitudes has been found to be associated with increased risk of IPV victimisation.<sup>20</sup> For these reasons, attitudes have been a key target of community education campaigns aimed at preventing violence against women.<sup>21</sup> However, to date, there has been little examination of the effectiveness of these initiatives at changing attitudes, or on any associated changes in violence rates.<sup>21-23</sup>

15  
16  
17  
18  
19  
20  
21  
22  
23  
24  
25  
26  
27  
28  
29  
30  
31  
32  
33  
New Zealand is one of few high-income countries where more than one comprehensive population-based survey of violence against women has been conducted: the first survey was conducted in 2003, and the second survey in 2019. Between the two surveys, a series of actions were taken to address family violence including; legislation (e.g. amendments to family violence law and protection for victims act), and prevention campaigns (e.g. the Family Violence: It’s not ok national campaign, and the ACC-funded mates and dates high schools programme on healthy relationships). Many of these initiatives have focussed on addressing physical and sexual violence and have included strong messaging about the importance of help-seeking by those experiencing violence. Comparable surveys on attitudes supporting violence over time may provide evidence about the impact of such campaigns at the population level.

34  
35  
36  
37  
38  
39  
40  
41  
42  
43  
44  
45  
46  
47  
48  
49  
In the current study, using data from two New Zealand cross-sectional population-based surveys we aimed to: (a) describe changes in the reported prevalence rates of physical and sexual IPV between 2003 and 2019, (b) examine whether changes in women’s sociodemographic characteristics were associated with changes in IPV prevalence rates, and (c) determine whether changes in the reported prevalence rates were consistent across population subgroups. We also sought to determine if there were (d) changes in attitudes supportive of violence and (e) changes in help-seeking for those who reported experiencing IPV.

## 50 51 52 **Method**

### **Procedure and participants**

53  
54  
55  
56  
57  
58  
59  
60  
Data was drawn from two cross-sectional studies on family violence conducted in New Zealand in 2003 and 2019. A comprehensive description of the methods used in the 2003 and 2019 surveys have been previously presented.<sup>14,24</sup> A brief description of the two surveys is presented here.



1  
2  
3 The 2003 study was conducted in Auckland and Waikato regions. For the 2019 study,  
4 Northland was also included in the sampling.

5  
6 Sampling strategies were similar in both surveys. A population-based cluster sampling scheme  
7 with a fixed number of dwellings per cluster was used for both studies. Primary sampling units  
8 (PSUs) were based on meshblock boundaries which contain between 50 and 100 dwellings.  
9  
10 The starting point consisted of a randomly selected street and street number within each PSU.  
11  
12 Interviewers made up to seven visits to each selected household to identify and recruit study  
13 participants. Non-residential, aged-care and short-term residential properties were excluded  
14 from both surveys. Interviewer training and support procedures were comparable across survey  
15 waves.  
16  
17  
18  
19

20 **Eligibility:** To be eligible to participate in the survey, household members needed to be able  
21 to speak conversational English, have lived in the household for at least one month and slept  
22 in the house for four or more nights a week.  
23

24  
25 Of the households invited, 88.3% in 2003 and 78% in 2019 agreed to participate. Of the eligible  
26 women, 75.8% in 2003 and 63.7% in 2019 participated, yielding an overall response rate of  
27 66.9% in 2003 and 63.7% in 2019. Figure 1 demonstrates the number of people invited and  
28 those who were interviewed and included in the analyses for each survey year.  
29

30  
31 Participants of the 2003 study were 2855 women aged 18-64 years. In 2019, the eligible  
32 population was expanded to include women and men aged 16 years and older resulting in 2,888  
33 completed interviews (n=1464 women, n=1423 men, n=1 other). For the purpose of this paper,  
34 only ever-partnered women aged 18-64 years from each sample were included, equivalent to  
35 almost 94% of all women aged 18-64 years surveyed in both waves (2003, n= 2674; 2019,  
36 n=944).  
37  
38  
39  
40  
41  
42  
43  
44

45 **Representativeness:** In both surveys, the ethnicity, marital status, and area-level deprivation  
46 distribution of the samples were closely comparable to the general population, however both  
47 samples were under-represented for younger women (ages 20-29 in 2003, 16-29 in 2019).<sup>14, 24</sup>  
48 Demographic characteristics of ever-partnered women aged 18-64 years in the 2003 and 2019  
49 surveys are presented in Table 1.  
50  
51  
52  
53  
54

### 55 **Safety and ethics considerations**

56 Ethics and safety recommendations for research on violence against women were followed  
57 throughout the research.<sup>25</sup> One individual was randomly selected from each household for the  
58 interview. In households with more than one eligible resident, the participant was randomly  
59  
60

1  
2  
3 selected. Interviews were conducted in privacy with no one over the age of two years present.  
4  
5 At the completion of the interview, interviewers provided all respondents with a list of  
6  
7 approved support agencies regardless of disclosure status. Written informed consent was  
8  
9 obtained from all participants.

10  
11 Ethics approval was granted through the University of Auckland human participants' ethics  
12  
13 committee (reference number 2002/199 for the 2003 study, and 2015/018244 for the 2019  
14  
15 study).

### 16 17 **Patient and Public involvement**

18  
19 No patients or members of the public were involved in the design, conduct or reporting or  
20  
21 dissemination plans of our research.

### 22 23 **Study instrument and measures**

24  
25 To collect data, the WHO Multi-Country Study on Women's Health and Domestic Violence  
26  
27 Against Women (WHO MCS) <sup>26</sup> was used in both surveys.

28  
29 'Intimate partners' included male current or ex-partners that the women were married to or had  
30  
31 lived with, or current regular male sexual partners. Definitions are presented in Supplementary  
32  
33 Table 1 for: physical and sexual IPV; socio-demographic characteristics; attitudes towards  
34  
35 gender roles, acceptance of attitudes justifying a man hitting his wife, and sources of help  
36  
37 sought (who was told about the IPV) and help received (sources who provided help. All  
38  
39 questions used for analyses were identical in the two surveys.

### 40 41 **Analytic procedure**

42  
43 To explore whether there were any underlying differences in demographic characteristics of  
44  
45 the respondents at the two time periods, the 2003 and 2019 samples were compared in terms  
46  
47 of age, relationship status, education attainment, access to an independent source of income,  
48  
49 and area-level deprivation using chi square tests.

50  
51 Then, the prevalence rates of physical and sexual IPV were compared between two samples  
52  
53 with results presented as percentages with 95% confidence intervals (CIs). As the results for  
54  
55 "moderate" and "severe" physical IPV showed similar patterns to any physical IPV, in the  
56  
57 following analyses, only the results for *any* physical IPV are presented. Any act of sexual IPV  
58  
59 was considered as severe. To identify evidence of differences in the estimated prevalence over  
60  
61 time, odds ratio (OR) and 95% CIs for reported experience of physical and sexual IPV were  
62  
63 calculated using univariate logistic regression models, with the study year as the predictor. The

1  
2  
3 same procedure was followed for assessing differences in women's attitudes towards gender  
4 roles, attitudes towards acceptability of a man hitting his wife, help sought, and help received  
5 between the study years. For help-seeking variables, the analyses were restricted to women  
6 who reported lifetime experience of physical or sexual IPV only.  
7  
8

9  
10 Then, to determine if the noted differences in the prevalence rates of IPV between the two  
11 study years found in the univariate analyses remained significant after controlling for  
12 sociodemographic characteristics, the following steps were taken:  
13

- 14 - First, the association between each socio-demographic characteristic and each type of  
15 IPV (lifetime or 12-month physical and sexual IPV) was explored using univariate  
16 logistic regression models with results presented as unadjusted odds ratios (OR) with  
17 95% CIs.  
18
- 19 - Second, multivariate analyses were conducted, with the study year and  
20 sociodemographic characteristics included, and results were presented as adjusted odds  
21 ratios (AOR) with 95% CIs.  
22

23  
24 Finally, to determine whether the noted changes in the reported prevalence rates were  
25 consistent across population subgroups, multivariate logistic regression models with  
26 interaction terms (between each sociodemographic characteristic and the study year) were  
27 tested. Potential confounders (e.g. age, education, relationship status, independent income, and  
28 area-level deprivation) and the study year were included in these analyses.  
29  
30

31  
32 All analyses were performed on a pooled dataset of the two samples. Missing data including:  
33 do not know, do not remember, and no responses were excluded from all analyses. Less than  
34 4% of any variable had missing data in both surveys. All analyses were conducted using  
35 Stata/SE 15.1<sup>27</sup> survey commands to allow for stratification by sample location (region),  
36 clustering by primary sampling units (PSU), and weighting of data to account for the number  
37 of eligible participants in each household.  
38  
39

## 40 41 42 43 44 45 46 47 48 49 50 51 52 53 54 **Results**

55 Differences between two study samples in terms of sociodemographic characteristics are  
56 presented in Table 1. In general, there were more women over 45 years in 2019 (51.4%)  
57 compared with 2003 (39.3%). Additionally, a higher proportion of the sample had attained  
58  
59  
60

1  
2  
3 tertiary education in 2019 (65.1%) compared with 44.8% in 2003. A smaller proportion of  
4 women in 2019 reporting having an independent source of income (72.5%) compared to 79.5%  
5 in 2003.  
6  
7  
8  
9

10  
11 Table 1. Demographic characteristics of ever-partnered women aged 18-64 years in 2003 and  
12 2019 surveys

|                               | 2003          | 2019         | p value |
|-------------------------------|---------------|--------------|---------|
| <b>Total sample</b>           | <b>n=2674</b> | <b>n=944</b> |         |
| <b>Age categories</b>         | n (%)*        | n (%)*       | 0.001   |
| 18-24                         | 182 (8.6)     | 45 (6.7)     |         |
| 25-34                         | 581(21.9)     | 169 (17.4)   |         |
| 35-44                         | 857(30.2)     | 218 (21.5)   |         |
| 45-54                         | 637(24.6)     | 268 (30.8)   |         |
| 55-64                         | 414(14.7)     | 244 (23.3)   |         |
| <b>Relationship status</b>    |               |              | 0.4     |
| Married                       | 1685 (61.4)   | 601 (63.3)   |         |
| Cohabiting                    | 574 (22.1)    | 201 (21.2)   |         |
| Divorced/separated/ broken up | 353 (14.3)    | 117 (12.6)   |         |
| Widowed                       | 60 (2.1)      | 25 (2.9)     |         |
| <b>Education attainment</b>   |               |              | 0.001   |
| Primary /Secondary            | 1478 (55.2)   | 315 (34.8)   |         |
| Higher                        | 1187 (44.8)   | 625 (65.1)   |         |
| <b>Independent income</b>     |               |              | 0.0007  |
| Yes                           | 2122 (79.5)   | 696 (72.5)   |         |
| No                            | 551 (20.4)    | 248 (27.0)   |         |
| <b>Area—level deprivation</b> |               |              | 0.1     |
| Least deprived                | 914 (33.6)    | 270 (26.8)   |         |
| Moderately deprived           | 1045 (38.8)   | 393 (39.8)   |         |
| Most deprived                 | 708 (27.5)    | 281 (33.4)   |         |

37 Data are n (Col%)

38 \*Weighted % are presented  
39  
40  
41  
42  
43  
44  
45  
46  
47  
48  
49  
50  
51  
52  
53  
54  
55  
56  
57  
58  
59  
60

Table 2. Characteristics of women reporting lifetime and past-12 month Physical IPV in the pooled database from two cross-sectional studies in New Zealand

|                                  | Lifetime                |                         | Univariate Model Odds Ratio (95%CI) | **Multivariate Model AOR (95%CI) | Past 12-month           |                         | Univariate Model Odds Ratio (95%CI) | **Multivariate Model AOR (95%CI) |
|----------------------------------|-------------------------|-------------------------|-------------------------------------|----------------------------------|-------------------------|-------------------------|-------------------------------------|----------------------------------|
|                                  | 2003<br>n<br>% (95%CI)* | 2019<br>n<br>% (95%CI)* |                                     |                                  | 2003<br>n<br>% (95%CI)* | 2019<br>n<br>% (95%CI)* |                                     |                                  |
| <b>Year (ref=2003)</b>           | 856<br>32.2 (30.2-34.2) | 291<br>29.1 (25.8-32.7) | 0.86<br>(0.71-1.04)                 | 0.89 (0.73-1.08)                 | 118<br>5.0 (4.1-6.1)    | 19<br>2.4 (1.5-3.8)     | 0.46 (0.27-0.79)                    | 0.53 (0.29-0.97)                 |
| <b>Age categories</b>            |                         |                         |                                     |                                  |                         |                         |                                     |                                  |
| 18-24                            | 53<br>28.1 (21.6-35.7)  | 14<br>24.4 (13.3-40.3)  | 1.00                                | 1.00                             | 18<br>9.4 (5.7-14.9)    | 4<br>9.7 (3.4-24.6)     | 1.00                                | 1.00                             |
| 25-34                            | 210<br>37.7 (33.6-42.0) | 36<br>20.6 (15.0-27.6)  | 1.36 (0.95-1.95)                    | 2.11 (1.43-3.13)                 | 49<br>10.0 (7.5-13.3)   | 4<br>2.4 (0.8-6.7)      | 0.87 (0.48-1.55)                    | 1.09 (0.59-2.02)                 |
| 35-44                            | 278<br>32.9 (29.4-36.5) | 71<br>32.9 (25.9-40.8)  | 1.31 (0.92-1.85)                    | 2.58 (1.75-3.82)                 | 35<br>4.7 (3.2-6.9)     | 2<br>0.7 (0.2-3.1)      | 0.39 (0.21-0.73)                    | 0.60 (0.29-1.21)                 |
| 45-54                            | 201<br>30.9 (27.2-34.9) | 83<br>28.0 (22.2-34.6)  | 1.14 (0.80-1.63)                    | 2.38 (1.60-3.54)                 | 10<br>1.7 (0.9-3.2)     | 3<br>1.7 (0.5-5.3)      | 0.16 (0.08-0.35)                    | 0.28 (0.12-0.64)                 |
| 55-64                            | 113<br>27.3 (23.0-32.0) | 87<br>34.9 (29.0-41.4)  | 1.15 (0.81-1.65)                    | 2.37 (1.58-3.56)                 | 6<br>1.3 (0.6-2.9)      | 6<br>2.6 (1.1-5.8)      | 0.17 (0.08-0.37)                    | 0.30 (0.13-0.68)                 |
| <b>Relationship status</b>       |                         |                         |                                     |                                  |                         |                         |                                     |                                  |
| Married                          | 358<br>21.2 (19.1-23.4) | 125<br>19.8 (16.5-23.7) | 1.00                                | 1.00                             | 39<br>2.5 (1.8-3.4)     | 6<br>1.1 (0.4-2.6)      | 1.00                                | 1.00                             |
| Cohabiting                       | 272<br>46.7 (42.3-51.2) | 85<br>40.3(33.0-48.0)   | 3.11 (2.58-3.76)                    | 3.75 (3.04-4.64)                 | 46<br>9.1 (6.6-12.3)    | 5<br>3.6 (1.4-8.9)      | 3.88 (2.48-6.06)                    | 2.68 (1.58-4.54)                 |
| Divorced/separated/<br>broken up | 207<br>57.8 (52.4-63.0) | 69<br>53.4 (43.2-63.2)  | 4.98 (3.98-6.22)                    | 4.84 (3.84-6.08)                 | 33<br>10.6 (7.4-15.0)   | 7<br>6.7 (3.1-14.0)     | 5.01 (3.10-8.12)                    | 4.27 (2.63-6.94)                 |
| Widowed                          | 19<br>28.8 (18.9-41.2)  | 12<br>44.1 (25.6-64.4)  | 1.96 (1.22-3.14)                    | 1.71 (1.05-2.78)                 | 0                       | 1<br>2.9 (0.4-18.4)     | 0.48 (0.06-3.57)                    | 0.65 (0.08-5.00)                 |
| <b>Education Attainment</b>      |                         |                         |                                     |                                  |                         |                         |                                     |                                  |
| Primary and secondary            | 519<br>34.6 (32.0-37.4) | 108<br>31.1 (24.9-38.1) | 1.00                                | 1.00                             | 77<br>5.5 (4.3-6.8)     | 7<br>3.2 (1.4-7.1)      | 1.00                                | 1.00                             |
| Tertiary level                   | 332<br>28.9 (26.2-31.8) | 182<br>28.1 (24.2-32.3) | 0.78 (0.66-0.91)                    | 0.87 (0.73-1.03)                 | 40<br>4.3 (3.1-6.0)     | 12<br>2.0 (1.1-3.5)     | 0.68 (0.47-1.00)                    | 0.82 (0.54-1.25)                 |
| <b>Independent income</b>        |                         |                         |                                     |                                  |                         |                         |                                     |                                  |
| No                               | 135<br>26.0 (21.8-30.7) | 75<br>28.2 (22.4-34.7)  | 1.00                                | 1.00                             | 26<br>6.3 (4.0-9.9)     | 5<br>1.9 (0.7-4.7)      | 1.00                                | 1.00                             |
| Yes                              | 720<br>33.8 (31.5-36.1) | 216<br>29.5 (25.6-33.6) | 1.33 (1.08-1.63)                    | 1.10 (0.90-1.36)                 | 92<br>4.7 (3.8-5.8)     | 14<br>2.6 (1.5-4.5)     | 0.85 (0.52-1.38)                    | 0.71 (0.39-1.27)                 |
| <b>Area-level deprivation</b>    |                         |                         |                                     |                                  |                         |                         |                                     |                                  |
| Least deprived                   | 224<br>25.9 (22.8-29.3) | 68<br>22.7 (18.2-27.9)  | 1.00                                | 1.00                             | 26<br>3.3 (2.0-5.3)     | 4<br>1.3 (0.5-3.3)      | 1.00                                | 1.00                             |
| Moderately deprived              | 344                     | 113                     | 1.34 (1.11-1.63)                    | 1.21 (1.00-1.48)                 | 44                      | 8                       | 1.54 (0.89-2.65)                    | 1.34 (0.78-2.28)                 |

|                 |                  |                  |                  |                  |                |               |                  |                  |
|-----------------|------------------|------------------|------------------|------------------|----------------|---------------|------------------|------------------|
|                 | 32.1 (29.0-35.2) | 28.5 (23.5-34.1) |                  |                  | 4.7 (3.5-6.2)  | 3.2 (1.5-6.6) |                  |                  |
| Mostly deprived | 285              | 110              | 1.86 (1.50-2.30) | 1.54 (1.24-1.91) | 48             | 7             | 2.23 (1.29-3.82) | 1.50 (0.89-2.54) |
|                 | 40.1 (36.1-44.2) | 34.9 (27.9-42.7) |                  |                  | 7.8 (5.8-10.3) | 2.3 (1.1-4.8) |                  |                  |

\* Weighted % and 95% CIs are presented.

\*\*AORs (Weighted Adjusted Odds Ratios) are adjusted for age, education, relationship status, area-deprivation level, independent income, and the year of the study

For peer review only

## ***Physical IPV***

### *Changes in physical IPV prevalence rates*

*Lifetime physical IPV prevalence.* The lifetime prevalence of physical IPV remained relatively unchanged between 2003 and 2019, with almost 30% of ever-partnered women aged 18-64 reporting having experienced at least one episode of physical violence (Table 2). After controlling for sociodemographic factors, adjusted odds ratios showed no significant difference in the reported prevalence rates of lifetime physical IPV between the two study years (AOR=0.89; 95%CI=0.73-1.08).

*12-month physical IPV prevalence.* The 12-month prevalence of physical IPV decreased from 5 % in 2003 to 2.4% in 2019 (OR=0.46; 95%CI=0.27-0.79). The adjusted odds ratio showed that, after controlling for sociodemographic factors, the decrease in 12-month physical IPV was attenuated but still remained significant (AOR=0.53; 95%CI=0.29-0.97).

### *Characteristics of women reporting lifetime and past-12 months physical IPV*

#### *Lifetime physical IPV:*

All sociodemographic factors were significantly associated with reporting lifetime physical IPV in the multivariate model, with the exception of “access to independent income” and “educational attainment”. Women aged 25 years and above were more likely to report having experienced at least one act of lifetime physical IPV. Compared with married women, a higher proportion of women who were cohabiting, divorced, or widowed reported experiencing lifetime physical IPV. Similarly, those who were living in the moderately or most deprived areas were more likely to report the experience of lifetime physical IPV compared with those living in the least deprived areas (Table 2).

*Past 12-month physical IPV.* At the multivariate level, age and relationship status were significantly associated with reports of experiencing past 12-month physical IPV. A lower proportion of women aged 45 years and older reported experiencing past 12-month physical IPV compared with those younger than 45 years. A higher proportion of those who were cohabiting or divorced compared with those who were married reported this experience (Table 2).

Table 3. Characteristics of women with lifetime and past-12 month **Sexual IPV** in the pooled database from two cross-sectional studies in New Zealand

|                                  | Lifetime                |                         | Univariate Model Odds Ratio (95%CI) | **Multivariate Model AOR (95%CI) | Past 12-month       |                     | Univariate Model Odds Ratio (95%CI) | **Multivariate Model AOR (95%CI) |
|----------------------------------|-------------------------|-------------------------|-------------------------------------|----------------------------------|---------------------|---------------------|-------------------------------------|----------------------------------|
|                                  | 2003 n % (95%CI)*       | 2019 n % (95%CI)*       |                                     |                                  | 2003 n % (95%CI)*   | 2019 n % (95%CI)*   |                                     |                                  |
| <b>Year (ref=2003)</b>           | 464<br>16.9 (15.4-18.6) | 133<br>13.1 (11.0-15.4) | 0.74<br>(0.59-0.92)                 | 0.74 (0.59-0.95)                 | 38<br>1.8 (1.3-2.6) | 10<br>0.9 (0.5-1.9) | 0.50 (0.23-1.10)                    | 0.50 (0.19-1.35)                 |
| <b>Age categories</b>            |                         |                         |                                     |                                  |                     |                     |                                     |                                  |
| 18-24                            | 25<br>14.2 (9.6-20.5)   | 5<br>7.3 (2.3-20.6)     | 1.00                                | 1.00                             | 8<br>5.6 (2.7-11.1) | 0                   | 1.00                                | 1.00                             |
| 25-34                            | 105<br>17.7 (14.7-21.2) | 18<br>10.3 (6.5-15.8)   | 1.32 (0.83-2.10)                    | 1.92 (1.18-3.14)                 | 13<br>2.8 (1.5-5.2) | 2<br>1.0 (0.2-3.8)  | 0.54 (0.21-1.41)                    | 0.62 (0.23-1.70)                 |
| 35-44                            | 154<br>17.6 (15.0-20.5) | 31<br>13.9 (9.6-19.8)   | 1.40 (0.89-2.20)                    | 2.54 (1.56-4.12)                 | 10<br>1.2 (0.4-3.0) | 4<br>0.5 (0.1-2.2)  | 0.32 (0.12-0.85)                    | 0.46 (0.17-1.24)                 |
| 45-54                            | 106<br>15.9 (13.0-19.3) | 39<br>13.6 (9.9-18.3)   | 1.24 (0.78-1.97)                    | 2.43 (1.46-4.03)                 | 5<br>0.4 (0.1-1.7)  | 2<br>0.7 (0.2-2.9)  | 0.22 (0.07-0.66)                    | 0.34 (0.11-1.09)                 |
| 55-64                            | 73<br>17.6 (14.0-21.9)  | 40<br>15.4 (11.3-20.7)  | 1.40 (0.89-2.21)                    | 2.78 (1.67-4.62)                 | 2<br>0.8 (0.4-1.6)  | 2<br>0.7 (0.2-1.9)  | 0.12 (0.04-0.42)                    | 0.18 (0.05-0.63)                 |
| <b>Relationship status</b>       |                         |                         |                                     |                                  |                     |                     |                                     |                                  |
| Married                          | 165<br>9.7 (8.3-11.3)   | 58<br>9.0 (6.9-11.7)    | 1.00                                | 1.00                             | 13<br>3.4 (2.0-5.7) | 5<br>0.4 (0.05-2.8) | 1.00                                | 1.00                             |
| Cohabiting                       | 155<br>25.6 (22.1-29.5) | 38<br>18.1 (12.8-25.0)  | 2.94 (2.33-3.71)                    | 3.52 (2.72-4.58)                 | 15<br>4.1 (2.0-7.9) | 1<br>2.7 (0.8-8.6)  | 3.30 (1.55-7.02)                    | 2.01 (0.85-4.73)                 |
| Divorced/separated/<br>broken up | 131<br>34.3 (28.9-40.1) | 34<br>25.7 (18.7-34.2)  | 4.50 (3.48-5.82)                    | 4.42 (3.39-5.76)                 | 10<br>4.1 (2.0-7.9) | 3<br>2.7 (0.8-8.6)  | 4.82 (2.11-11.0)                    | 3.89 (1.71-8.85)                 |
| Widowed                          | 13<br>19.7 (11.7-31.2)  | 3<br>8.8 (2.8-24.8)     | 1.81 (1.02-3.20)                    | 1.58 (0.88-2.82)                 | 0                   | 1<br>2.9 (0.4-18.5) | 1.27 (0.16-9.90)                    | 1.55 (0.20-12.19)                |
| <b>Education attainment</b>      |                         |                         |                                     |                                  |                     |                     |                                     |                                  |
| Primary and secondary            | 291<br>19.2 (17.2-21.5) | 54<br>14.8 (11.0-19.6)  | 1.00                                | 1.00                             | 25<br>2.0 (1.3-3.2) | 6<br>1.7 (0.7-4.0)  | 1.00                                | 1.00                             |
| Tertiary level                   | 172<br>14.1 (12.2-16.3) | 78<br>12.1 (9.7-15.1)   | 0.69 (0.57-0.83)                    | 0.77 (0.64-0.94)                 | 13<br>1.6 (0.9-2.8) | 3<br>0.4 (0.1-1.2)  | 0.58 (0.300-1.12)                   | 0.77 (0.36-1.62)                 |
| <b>Independent income</b>        |                         |                         |                                     |                                  |                     |                     |                                     |                                  |
| Yes                              | 388<br>17.7 (16.0-19.5) | 98<br>13.2 (10.9-16.0)  | 1.25 (0.98-1.60)                    | 1.05 (0.81-1.35)                 | 28<br>1.7 (1.1-2.5) | 7<br>0.9 (0.4-2.2)  | 0.79 (0.39-1.59)                    | 0.76 (0.34-1.69)                 |



|                               |                         |                        |                  |                  |                     |                     |                   |                  |
|-------------------------------|-------------------------|------------------------|------------------|------------------|---------------------|---------------------|-------------------|------------------|
| No                            | 76<br>14.1 (11.2-17.7)  | 35<br>12.6 (9.0-17.6)  | 1.00             | 1.00             | 10<br>2.4 (1.2-4.5) | 3<br>0.9 (0.3-2.9)  | 1.00              | 1.00             |
| <b>Area-deprivation level</b> |                         |                        |                  |                  |                     |                     |                   |                  |
| Least deprived                | 123<br>13.2 (11.0-15.7) | 32<br>11.8 (8.2-16.7)  | 1.00             | 1.00             | 4<br>0.6 (0.2-1.6)  | 2<br>0.9 (0.2-4.0)  | 1.00              | 1.00             |
| Moderately deprived           | 181<br>16.9 (14.6-19.4) | 48<br>12.0 (9.1-15.7)  | 1.24 (0.98-1.57) | 1.12 (0.88-1.44) | 16<br>2.1 (1.2-3.5) | 2<br>0.4 (0.06-3.0) | 2.46 (0.92-6.59)  | 2.16 (0.79-5.94) |
| Mostly deprived               | 160<br>21.8 (18.5-25.5) | 53<br>15.3 (11.6-19.9) | 1.66 (1.29-2.15) | 1.36 (1.03-1.78) | 18<br>3.1 (1.8-5.1) | 6<br>1.5 (0.7-3.4)  | 3.95 (1.52-10.25) | 2.78 (1.04-7.40) |

\* Weighted % and 95% CIs are presented.

\* AORs (Weighted Adjusted Odds Ratios) are adjusted for age, education, relationship status, area-deprivation level, independent income, and the year of the study.

For peer review only

## ***Sexual IPV***

### *Changes in sexual IPV prevalence rates*

*Lifetime prevalence.* A significant decrease in the reported lifetime prevalence of sexual IPV was found in univariate analysis, from 16.9% in 2003 to 13.1% in 2019 (OR= 0.74; 95%CI=0.59-0.92). After controlling for sociodemographic variables, the significant decrease in the reported experience of lifetime sexual IPV remained unchanged (AOR=0.74; 95%CI=0.59-0.95).

*12-month prevalence.* No significant differences in the 12-month prevalence rates of sexual IPV between two study years was found in univariate analysis (approximately 1% in both study years) (OR=0.50, 95%CI=0.23-1.10). After controlling for sociodemographic factors, the nonsignificant difference in 12-month sexual IPV between two study years remained unchanged (AOR=0.50; 95%CI=0.19-1.35).

### *Characteristics of women reporting lifetime and past-12 months sexual IPV*

*Lifetime sexual IPV.* At the multivariate level, age, relationship status, education attainment, and area-deprivation level were significantly associated with lifetime sexual IPV. Women were more likely to report having experienced lifetime sexual IPV if they were: aged 25 and over; cohabiting, divorced or separated, or widowed; or living in the most deprived areas. Those who had some tertiary education were less likely to report lifetime experience of sexual IPV compared with those with primary or secondary education (Table 3).

*Past 12-month sexual IPV.* Those who were divorced/separated were more likely to report having experienced 12-month sexual IPV compared to married women. Those living in the most deprived areas were also more likely to report 12-month sexual IPV. Women aged 55 years and above were less likely to report having experienced sexual IPV in the past 12 months compared with younger women (Table 3).

No significant interaction was found between study year and socio-demographic factors (data not shown).

### *Changes in women's attitudes*

In 2003, 48.1% agreed with at least one of the statements indicating agreement with traditional gender roles, compared with 38.4% in 2019. While not common in 2003, it was even less

1  
2  
3  
4  
5  
6  
7  
8  
9  
10  
11  
12  
13  
14  
15  
16  
17  
18  
19  
20  
21  
22  
23  
24  
25  
26  
27  
28  
29  
30  
31  
32  
33  
34  
35  
36  
37  
38  
39  
40  
41  
42  
43  
44  
45  
46  
47  
48  
49  
50  
51  
52  
53  
54  
55  
56  
57  
58  
59  
60

common in 2019 for women to agree with the justifications for a man to hit his wife if he finds out she has been unfaithful (3.8% agreement in 2003, 1.8% agreement in 2019) (Table 4).

For peer review only

Table 4. Prevalence rates and changes in women's attitudes toward traditional gender roles in relationships and attitudes towards acceptability of a man hitting his wife.

| Attitude item                                                                               | Freq<br>% (95% CI)*       |                         | Odds ratio<br>(95%CI)* | P value |
|---------------------------------------------------------------------------------------------|---------------------------|-------------------------|------------------------|---------|
|                                                                                             | 2003 (n=2674)             | 2019 (n=944)            |                        |         |
| <b>Roles of women and men in relationships</b>                                              |                           |                         |                        |         |
| A good wife obeys her husband even if she disagrees                                         | 371<br>13.6 (12.0-15.4)   | 108<br>14.7 (10.8-19.8) | 1.10 (0.75-1.61)       | 0.6     |
| Family problems should only be discussed with people in the family                          | 1076<br>39.5 (37.2-41.9)  | 274<br>27.6 (24.0-31.4) | 0.58 (0.47-0.72)       | 0.001   |
| It is important for a man to show his partner who is boss                                   | 201<br>7.4 (6.2-8.7)      | 32<br>3.1 (2.1-4.7)     | 0.40 (0.25-0.64)       | 0.001   |
| A woman should be able to choose her own friends even if her husband disapproves (disagree) | 169<br>6.0 (5.1-7.2)      | 66<br>7.3 (5.5-9.6)     | 1.23 (0.87-1.74)       | 0.2     |
| It's a wife obligation to have sex with her husband even if she doesn't feel like           | 216<br>8.1 (6.9-9.4)      | 56<br>5.8 (4.1-8.0)     | 0.70 (0.47-1.03)       | 0.07    |
| At least agreed with one statement                                                          | 1337<br>48.1 (45.7-50.5)  | 365<br>38.4 (33.8-43.2) | 0.67 (0.54-0.83)       | 0.001   |
| <b>Acceptability of a man hitting his wife</b>                                              |                           |                         |                        |         |
| She doesn't complete her household work to his satisfaction                                 | 9<br>0.3 (0.1-0.6)        | 5<br>0.4 (0.1-1.2)      | 1.47 (0.40-5.36)       | 0.5     |
| She disobeys him                                                                            | 18<br>0.5 (0.3-0.9)       | 8<br>0.7 (0.3-1.5)      | 1.32 (0.52-3.34)       | 0.5     |
| She refuses to have sex with him                                                            | 9<br>0.2 (0.1-0.5)        | 5<br>0.5 (0.2-1.3)      | 1.99 (0.60-6.62)       | 0.2     |
| She asks him whether he has other girlfriends                                               | 18<br>0.5 (0.3-1.0)       | 3<br>0.2 (0.04-0.7)     | 0.31 (0.07-1.39)       | 0.1     |
| He suspects that she is unfaithful                                                          | 36<br>1.3 (0.9-1.9)       | 8<br>0.7 (0.3-1.5)      | 0.52 (0.22-1.25)       | 0.1     |
| He finds out she has been unfaithful                                                        | 107<br>3.8 (3.0-4.8)      | 17<br>1.8 (1.0-3.3)     | 0.46 (0.24-0.90)       | 0.02    |
| At least one                                                                                | 107/2748<br>3.5 (2.8-4.5) | 22<br>2.3 (1.4-3.8)     | 0.64 (0.35-0.1.14)     | 0.1     |

\*Weighted % and odds ratios with 95% CIs are presented

### *Changes in help seeking behaviors*

There was an overall reduction in the proportion of women who had sought help from formal or informal sources, with three-quarters (77%) of women who had experienced IPV reporting that they had told someone about the violence in 2003 compared with 70% in 2019. This reduction appears to be driven by the significant reduction in the proportion of women who sought help from informal sources (from 71.3% in 2003 to 64.6% in 2019). There was no change in the proportion of women who sought help from 'formal' sources between the two study years. Similarly, there was no significant change in the proportion of women who reported that they received help from formal sources (Table 5).

Table 5. Prevalence rates and changes in help sought and received help between 2003 and 2019 by those who reported at least one type of sexual or physical IPV.

| Source of help                                     |                                                    | <i>Help sought (Who you told about IPV)</i> |                         |                  |         | <i>Who helped you with IPV</i> |                         |                  |         |
|----------------------------------------------------|----------------------------------------------------|---------------------------------------------|-------------------------|------------------|---------|--------------------------------|-------------------------|------------------|---------|
|                                                    |                                                    | 2003 (n=957)                                | 2019 (n=322)            | Odds ratio       | P value | 2003 (n=957)                   | 2019 (n=322)            | Odds ratio       | P value |
| No one                                             |                                                    | 223<br>23.3(20.6- 26.3)                     | 89<br>30.0 (24.8-35.9)  | 1.41 (1.04-1.92) | 0.027   | 397<br>40.6 (37.5-43.9)        | 125<br>39.9 (34.5-45.6) | 0.97 (0.74-1.27) | 0.8     |
| Informal sources                                   |                                                    | 679<br>71.3 (68.1-74.2)                     | 216<br>64.6 (58.7-70.1) | 0.74 (0.55-0.98) | 0.037   | 489<br>52.0 (48.8-55.3)        | 171<br>52.1 (46.4-57.7) | 1.00 (0.77-1.30) | 0.9     |
| Formal sources                                     | police/lawyer/court                                | 132<br>13.6 (11.4-16.2)                     | 49<br>13.8 (10.4-18.2)  | 1.02 (0.69-1.49) | 0.9     | 89<br>9.1 (7.4-11.2)           | 31<br>8.8 (6.1-12.5)    | 0.96 (0.61-1.50) | 0.8     |
|                                                    | Women's<br>refugee/NGO/women<br>organization/Marae | 44<br>4.5 (3.2-6.3)                         | 24<br>6.9 (4.3-11.0)    | 1.57 (0.84-2.91) | 0.15    | 43<br>4.3 (3.1-5.9)            | 19<br>5.3 (3.1-8.9)     | 1.24 (0.64-2.37) | 0.5     |
|                                                    | Health workers                                     | 125<br>12.9 (10.8-15.4)                     | 40<br>11.2 (8.2-15.1)   | 0.85 (0.57-1.26) | 0.4     | 71<br>7.7 (5.9-9.9)            | 26<br>8.0 (5.4-11.6)    | 1.04 (0.63-1.71) | 0.8     |
|                                                    | Counsellor                                         | 168<br>16.7 (14.4-19.2)                     | 45<br>12.2 (8.9-16.6)   | 0.69 (0.47-1.03) | 0.07    | 103<br>10.4 (7.4-14.3)         | 37<br>10.4 (7.4-14.3)   | 0.98 (0.64-1.49) | 0.9     |
|                                                    | At least one                                       | 294<br>30.3 (27.3-33.4)                     | 93<br>25.8 (21.1-31.1)  | 0.80 (0.59-1.08) | 0.1     | 203<br>21.1 (18.5-24.0)        | 67<br>19.4 (15.2-24.4)  | 0.90 (0.64-1.25) | 0.5     |
| Religious leader (priest in<br>2003)/church member |                                                    | 31<br>3.2 (2.2-4.8)                         | 4<br>1.1 (0.4-2.8)      | 0.32 (0.11-0.93) | 0.037   | 16<br>1.8 (1.0-3.1)            | 5<br>1.3 (0.5-3.2)      | 0.73 (0.26-2.08) | 0.5     |

## Discussion

Changes in prevalence of physical and sexual IPV between 2003 and 2019 were explored using two population-based surveys. Our findings indicated that the lifetime prevalence of physical IPV remained relatively unchanged between 2003 and 2019, with almost one third (30%) of women in both surveys reporting having experienced at least one act of physical IPV in their lifetime. This is similar to reported prevalence rates from the EU 28-countries study (33%),<sup>28</sup> and the USA (30.6%),<sup>29</sup> and is comparable to the global average.<sup>30</sup> While lifetime prevalence of physical IPV was unchanged, there was a significant decrease in the proportion of women who reported experiencing 12-month physical IPV. Small reductions in rates for lifetime sexual IPV were also observed. Population changes in sociodemographic characteristics did not fully explain the decreases in IPV prevalence over time, and the noted changes were consistent across sub-groups of the population.

In 2003, 48.1% of women agreed one or more of the statements supportive of traditional gender roles, compared with 38.4% in 2019. These were low percentages of agreement compared with women in low- and middle- income countries.<sup>31-33</sup> Agreement with attitudes supportive of justifications for a man hitting his wife was low in both the 2003 (0.2%-3.8%) and 2019 surveys (0.2%-2.3%), and extremely low compared with results reported from low-and middle-income countries.<sup>34, 35</sup> but comparable with high income countries.<sup>36</sup> Even with this low rate of agreement, change was still observed, with a significant reduction in agreement with the statement that “it is acceptable for a man to hit his wife if he found out she was unfaithful”, from 3.8% in 2003 to 1.8% in 2019.

Overall, among women who experienced IPV, the rates of disclosure (telling someone about the violence) were high (77% in 2003, 70% in 2019), compared with findings from low- and middle income countries,<sup>37, 38</sup> and comparable with high income countries.<sup>39</sup> It should be noted, however, that most disclosures were made to informal sources, such as family or friends. There was no change in “help received” from formal sources (21.1% in 2003, 19.4% in 2019). This warrants further attention, to determine if this is due to limited service capacity, or limits in the quality of help currently available.

Possible explanations for the study findings include: actual changes in perpetrator behavior over time; or changes due to differences in methods, measurement or samples.

1  
2  
3 There is some evidence that changes in perpetrator behavior may have occurred, as the  
4 reduction in the 12-month prevalence of physical and lifetime sexual IPV between 2003 and  
5 2019 is consistent with a reduction in 12-month prevalence of psychological IPV noted in the  
6 same sample (Fanslow et al, BMJ Open, under revision).<sup>40</sup> Changes in perpetrator behaviour  
7 are possible, as there have been a series of strategies and campaigns implemented between the  
8 two study years. These included: changes in legislation (e.g. amendments to family violence  
9 law), and the introduction of prevention campaigns and programmes (e.g. the Family Violence:  
10 It's not ok national campaign,<sup>41</sup> and Accident Compensation Corporation-funded Mates and  
11 Dates high schools programmes on healthy relationships<sup>42</sup>). These actions may have  
12 contributed to changes in societal awareness and understandings of attitudes supportive of  
13 violence against women as there is some evidence that these initiatives had wide population  
14 reach.<sup>40</sup> This interpretation is supported by our findings on the reduction in women's  
15 agreement with attitudes toward traditional gender roles and reduction in women's agreement  
16 with the acceptability of a man hitting his wife if she was unfaithful.

17 An additional feature of these societal actions was the call for those experiencing violence to  
18 reach out for help.<sup>41</sup> Our findings suggest that there has been no change in women contacting  
19 formal source of help, and a small but significant reduction in talking with informal sources.  
20 This finding raises concerns that activities designed to encourage community engagement in  
21 violence prevention may need additional resourcing to ensure a sustained response. Further  
22 research with larger sample sizes will be important to verify this finding.

23 The alternate explanation of the observed changes being due to differences in study methods  
24 or sample difference seem less likely. Specifically, the comparability of methods across the  
25 two surveys, including use of identical questions in the two survey waves, lends strength to  
26 the interpretation that the prevalence changes noted are real. Additionally, while there were  
27 some differences in the characteristics of the two samples, the adjusted odds ratio showed  
28 that after controlling for all socio-demographic factors, the observed differences in  
29 prevalence still remained significant.

30 The observed reduction in 12-month prevalence of physical IPV is positive, and parallels  
31 overall reductions in crime rates reported by crime and victimisation surveys,<sup>43</sup> and is similar  
32 to reductions in prevalence of IPV documented in Australia between 1996 and 2005.<sup>44</sup> It may  
33 be the result of more women recognising abusive behaviour and taking their own actions to



1  
2  
3 leave abusive relationships. However, further efforts and investment are needed to ensure that  
4 those who ask for help actually receive help. Importantly, the stability of the lifetime  
5 prevalence of physical IPV should heighten efforts to develop and implement comprehensive  
6 and sustained prevention work with those who use violence in relationships.  
7  
8  
9

### 10 11 ***Strengths***

12 Strengths include: the representativeness of the samples obtained, and the use of comparable  
13 methods and comparable questions across the two survey waves. Additionally, the 15 year time  
14 gap between the two survey waves is sufficient to determine if real change occurred.<sup>12</sup>  
15  
16  
17  
18  
19

### 20 21 ***Limitations and recommendations for future studies***

22 Changes between two time points are not sufficient to determine if the change represents a  
23 trend, so caution is needed when interpreting the changes observed. Overall, the prevalence  
24 estimate obtained may under-report what is happening in the population as a whole, either  
25 because of stigma,<sup>45</sup> or because of the overall response rate for the study. While we  
26 successfully surveyed over 63% of eligible women, those with greater levels of exposure to  
27 violence may be less likely to have participated. Future studies would benefit from larger  
28 sample sizes, which would improve the chance of detecting real changes in low base rate  
29 phenomena, such as 12-month prevalence of sexual IPV.  
30  
31  
32  
33  
34  
35  
36  
37

### 38 39 ***Conclusion***

40 The observed reduction in 12-month physical and lifetime sexual IPV prevalence rates, changes  
41 in attitudes about the acceptability of violence, and the increases in help seeking are positive.  
42 However, work is still needed to address the substantial problem of IPV, as the lifetime  
43 prevalence rate of 1 in 3 women experiencing IPV remained stable over the 15-year time  
44 interval. This means that prevention efforts must be increased and sustained, and that adequate  
45 structures and resources must be available to respond to those seeking help.  
46  
47  
48  
49  
50  
51  
52

### 53 54 ***Acknowledgements***

55 We gratefully acknowledge participants, the interviewers, and the study project team, led by  
56 Patricia Meagher-Lundberg. We also acknowledge the representatives from the Ministry of  
57 Justice, the Accident Compensation Corporation, the New Zealand Police, and the Ministry of  
58 Education, who were part of the Governance Group for Family and Sexual Violence at the  
59  
60

1  
2  
3 inception of the study. The two cross-sectional studies from which this study used data are  
4 based on the WHO Violence Against Women Instrument as developed for use in the WHO  
5 Multi-Country Study on Women's Health and Domestic Violence and has been adapted from  
6 the version used in Asia and the Pacific by kNOwVAWdata (Version 12.03).  
7  
8  
9

10  
11  
12  
13  
14 Contributors: Janet Fanslow (JF), Pauline Gulliver (PG), contributed to the conception and  
15 design of the study. Tracey McIntosh (TM) contributed to the application for funding of 2019  
16 study. Ladan Hashemi (LH) managed the data cleaning, and conducted the analyses, with  
17 contributions from Zarintaj Malihi (ZM). LH, JF and PG interpreted the data, drafted the  
18 article and revised it. All authors contributed to the manuscript and approved the final  
19 version.  
20

21  
22 Competing interests hereby we confirm that all authors read and understood BMJ policy on  
23 declaration of interests and have completed the ICMJE uniform disclosure form at  
24 [http://www.icmje.org/coi\\_disclosure.pdf](http://www.icmje.org/coi_disclosure.pdf) and declare that we have no financial relationships  
25 with any organisations that might have an interest in the submitted work in the previous three  
26 years.  
27

28  
29 Funding. This work was supported by the Health Research Council of New Zealand (Grant  
30 02/207) for the 2003 study and the New Zealand Ministry of Business, Innovation and  
31 Employment, Contract number CONT-42799-HASTR-UOA for the 2019 study.  
32

33  
34 Ethics approval was granted by the University of Auckland Human Participants Ethics  
35 Committee in 2003 (Ref number: 2002/199) and 2019 (Reference number 2015/ 018244).  
36

37  
38 Data availability statement. Data are unavailable due to the confidentiality and sensitivity of  
39 the data and Māori data sovereignty.  
40

- 41 1. United Nations, *Secretary-General's in-depth study on all forms of violence against women, in*  
42 *Report of the Secretary-General*. 2006: U.N. document A/61/122/Add.1.
- 43 2. Kangaspunta, K. and I.H. Marshall, *Trends in Violence against Women: Some Good News and*  
44 *Some Bad News*, in *The International Crime Drop*, A.T. Jan van Dijk, Graham Farrell, Editor.  
45 2012, Palgrave Macmillan: London. p. 103-155.
- 46 3. Gulliver, P. and J. Fanslow, *Measurement of family violence at a population level: : What might*  
47 *be needed to develop reliable and valid family violence indicators?* 2012, New Zealand Family  
48 Violence Clearinghouse: New Zealand.
- 49 4. Powers, R.A. and C.E. Kaukinen, *Trends in Intimate Partner Violence: 1980-2008*. *Journal of*  
50 *Interpersonal Violence*, 2012. **27**(15): p. 3072-3090.
- 51 5. Orr, C., D. Preen, C. Fisher, S. Sims, and M. O'Donnell, *Trends in Hospital Admissions for*  
52 *Intimate Partner Violence in Australian Mothers With Children Born From 1990 to 2009*.  
53 *Journal of Interpersonal Violence*, 2019: p. 0886260519832905.
- 54 6. United\_Nations, *The World's Women 2010: Trends and Statistics*, in *UN Stats*. 2010.
- 55 7. Tjaden, P. and N. Thoennes, *Prevalence, Incidence, and Consequences of Violence Against*  
56 *Women: Findings From the National Violence Against Women Survey*. 1998, U.S. Department  
57 of Justice, Office of Justice Programs, National Institute of Justice: Washington, U.S.A.  
58  
59  
60

- 1
  - 2
  - 3
  - 4
  - 5
  - 6
  - 7
  - 8
  - 9
  - 10
  - 11
  - 12
  - 13
  - 14
  - 15
  - 16
  - 17
  - 18
  - 19
  - 20
  - 21
  - 22
  - 23
  - 24
  - 25
  - 26
  - 27
  - 28
  - 29
  - 30
  - 31
  - 32
  - 33
  - 34
  - 35
  - 36
  - 37
  - 38
  - 39
  - 40
  - 41
  - 42
  - 43
  - 44
  - 45
  - 46
  - 47
  - 48
  - 49
  - 50
  - 51
  - 52
  - 53
  - 54
  - 55
  - 56
  - 57
  - 58
  - 59
  - 60
8. Canada, S., *The violence against women survey. Highlights*, in *Dly Stat Can*. 1993: Canada. p. 1-9.
  9. Mouzos, J. and T. Makkai, *Women's Experiences of Male Violence: Findings from the Australian Component of the International Violence Against Women Survey (IVAWS)*, R.a.P.P. Series, Editor. 2004, Australian Institute of Criminology: Australia. p. 162.
  10. FRA, *Violence against women: an EU-wide survey*. 2014, European Union Agency for Fundamental Rights: Luxembourg: Publications Office of the European Union.
  11. Heiskanen, M. and M. Piispa, *Faith, Hope, Battering: A Survey of Men's Violence Against Women in Finland*. 1998, Helsinki: Yliopistopaino
  12. Heiskanen, M. and M. Piispa. *Violence against Women in Finland. Results from Two National Victimization Surveys*. in *VICTIMISATION SURVEYS IN COMPARATIVE PERSPECTIVE 2007*. Stockholm: European Institute for Crime Prevention and Control, affiliated with the United Nations (HEUNI) P.O.Box 444 FIN-00531 Helsinki Finland.
  13. Sanz-Barbero, B., N. Barón, and C. Vives-Cases, *Prevalence, associated factors and health impact of intimate partner violence against women in different life stages*. *PLoS ONE*, 2019. **14**: p. e0221049.
  14. Fanslow, J.L. and E.M. Robinson, *Violence against women in New Zealand: Prevalence and health consequences*. *New Zealand Medical Journal* 2004. **117**(1206).
  15. Dahlberg, L.L. and E.G. Krug. *Violence a global public health problem* 2006 [cited 11; 277-292]. Available from: [http://www.scielo.br/scielo.php?script=sci\\_arttext&pid=S1413-81232006000200007&nrm=iso](http://www.scielo.br/scielo.php?script=sci_arttext&pid=S1413-81232006000200007&nrm=iso).
  16. Heise, L.L., *Violence Against Women: An Integrated, Ecological Framework*. 1998. **4**(3): p. 262-290.
  17. Kim, J.Y., S. Oh, and S.I. Nam, *Prevalence and Trends in Domestic Violence in South Korea: Findings From National Surveys*. *Journal of Interpersonal Violence*, 2015. **31**(8): p. 1554-1576.
  18. Dawson, M., V.P. Bunge, and T. Balde, *National Trends in Intimate Partner Homicides: Explaining Declines in Canada, 1976 to 2001*. *Violence Against Women*, 2009. **15**(3): p. 276-306.
  19. Hindin, M.J., *Understanding women's attitudes towards wife beating in Zimbabwe / Michelle J. Hindin*. *Bulletin of the World Health Organization : the International Journal of Public Health* 2003 ; **81**(7) : 501-508, 2003.
  20. Koenig, M.A., R. Stephenson, S. Ahmed, S.J. Jejeebhoy, and J. Campbell, *Individual and contextual determinants of domestic violence in North India*. *American journal of public health*, 2006. **96**(1): p. 132-138.
  21. World Health, O., *Changing cultural and social norms that support violence*. 2009, World Health Organization: Geneva.
  22. Donovan, R.J., D. Paterson, and M. Francas, *Targeting male perpetrators of intimate partner violence: Western Australia's "Freedom from Fear" campaign*. *Soc Mar Q*, 1999. **5**(3): p. 128-44.
  23. Usdin, S., E. Scheepers, S. Goldstein, and G. Japhet, *Achieving social change on gender-based violence: a report on the impact evaluation of Soul City's fourth series*. *Soc Sci Med*, 2005. **61**(11): p. 2434-45.
  24. Fanslow, J., P. Gulliver, L. Hashemi, Z. Malihi, and T. McIntosh, *Methods for the 2019 New Zealand family violence study- a study on the association between violence exposure, health and well-being*. *Kōtuitui: New Zealand Journal of Social Sciences Online*, 2021: p. 1-14.
  25. WHO, *Putting women first: ethical and safety recommendations for research on domestic violence against women*. 2001, Department of Gender and Women's Health, Family and Community Health, World Health Organization: Geneva, Switzerland.
  26. Core Technical Team, W.M.-c.S.o.V.A.W., *WHO MultiCountry Study on Violence Against Women, Questionnaire, Version 10*. 2003, WHO: Gender and Health Department.
  27. StataCorp, *Stata Statistical Software: Release 15*. *College Station, TX: StataCorp LLC*. 2017.

- 1  
2  
3 28. Goodey, J., *Violence Against Women: Placing Evidence From a European Union–Wide Survey in a Policy Context*. Journal of Interpersonal Violence, 2017. **32**(12): p. 1760-1791.
- 4  
5 29. Smith, S.G., Zhang, X., Basile, K.C., Merrick, M.T., Wang, J., Kresnow, M., Chen, J. , *National Intimate Partner and Sexual Violence Survey: 2015 Data Brief – Updated Release*. 2018, National Center for Injury Prevention and Control, Centers for Disease Control and Prevention: Atlanta, Georgia.
- 6  
7  
8  
9 30. WHO, *Global and regional estimates of violence against women: prevalence and health effects of intimate partner violence and non-partner sexual violence*. 2013, World Health Organization: Italy.
- 10  
11 31. Jayatilleke, A., K.C. Poudel, K. Sakisaka, J. Yasuoka, A.U. Jayatilleke, and M. Jimba, *Wives' Attitudes Toward Gender Roles and Their Experience of Intimate Partner Violence by Husbands in Central Province, Sri Lanka*. 2011. **26**(3): p. 414-432.
- 12  
13  
14 32. Hayati, E.N., U. Hogberg, M. Hakimi, M.C. Ellsberg, and M. Emmelin, *Behind the silence of harmony: risk factors for physical and sexual violence among women in rural Indonesia*. BMC Women's Health, 2011. **11**: p. 52.
- 15  
16  
17 33. Black, E., H. Worth, S. Clarke, J.H. Obol, P. Akera, A. Awor, M.S. Shabiti, H. Fry, and R. Richmond, *Prevalence and correlates of intimate partner violence against women in conflict affected northern Uganda: a cross-sectional study*. Conflict and Health, 2019. **13**(1): p. 35.
- 18  
19  
20 34. Khan, M.N. and M.M. Islam, *Women's attitude towards wife-beating and its relationship with reproductive healthcare seeking behavior: A countrywide population survey in Bangladesh*. PloS one, 2018. **13**(6): p. e0198833-e0198833.
- 21  
22  
23 35. Hindin, M.J., *Understanding women's attitudes towards wife beating in Zimbabwe*. Bull World Health Organ, 2003. **81**(7): p. 501-8.
- 24  
25  
26 36. VicHealth, *Australians' attitudes to violence against women*. 2014, Victorian Health Promotion Foundation: Australia.
- 27  
28  
29 37. Leonardsson, M. and M. San Sebastian, *Prevalence and predictors of help-seeking for women exposed to spousal violence in India – a cross-sectional study*. BMC Women's Health, 2017. **17**(1): p. 99.
- 30  
31  
32 38. Linos, N., N. Slopen, L. Berkman, S.V. Subramanian, and I. Kawachi, *Predictors of help-seeking behaviour among women exposed to violence in Nigeria: a multilevel analysis to evaluate the impact of contextual and individual factors*. J Epidemiol Community Health, 2014. **68**(3): p. 211-7.
- 33  
34  
35 39. Ansara, D.L. and M.J. Hindin, *Formal and informal help-seeking associated with women's and men's experiences of intimate partner violence in Canada*. Social Science & Medicine, 2010. **70**(7): p. 1011-1018.
- 36  
37  
38 40. Fanslow, J.L., Z. Malihi, L. Hashemi, P. Guliver, and T. McIntosh, *Change in prevalence of psychological and economic abuse, and controlling behaviours against women by an intimate partner in two cross-sectional studies in New Zealand, 2003-2019*. BMJ Open, Under revision.
- 39  
40  
41 41. Roguski, M., *'It's not OK' Campaign Community Evaluation Project 2015*, New Zealand Ministry of Social Development: New Zealand.
- 42  
43  
44 42. Duncan, A. and V. Kingi, *Evaluation of ACC's Mates and Dates : : school-based healthy relationships primary prevention programme pilot*. 2015, Wellington, New Zealand:: Lighthouse Consulting New Zealand.
- 45  
46  
47 43. Mayhew, P., *The Case of Australia and New Zealand*. , in *The International Crime Drop -2012 New Directions in Research*, J.v.D.A.T.G. Farrell, Editor. 2012, Palgrave Macmillan, a division of Macmillan Publishers Limited 2012. p. 76-102.
- 48  
49  
50 44. ABS, *Personal Safety, Australia, Changes in prevalence of partner violence over time*. 2012.
- 51  
52  
53 45. Gracia, E., *Unreported cases of domestic violence against women: towards an epidemiology of social silence, tolerance, and inhibition*. Journal of epidemiology and community health, 2004. **58**(7): p. 536-537.
- 54  
55  
56  
57  
58  
59  
60

1  
2  
3  
4  
5  
6  
7  
8  
9  
10  
11  
12  
13  
14  
15  
16  
17  
18  
19  
20  
21  
22  
23  
24  
25  
26  
27  
28  
29  
30  
31  
32  
33  
34  
35  
36  
37  
38  
39  
40  
41  
42  
43  
44  
45  
46  
47  
48  
49  
50  
51  
52  
53  
54  
55  
56  
57  
58  
59  
60

For peer review only

1  
2  
3 Figure legend:

4 Figure 1 Flow diagram of female participants in the 2003 and 2019 population-based studies  
5 on family violence in New Zealand  
6  
7  
8  
9  
10  
11  
12  
13  
14  
15  
16  
17  
18  
19  
20  
21  
22  
23  
24  
25  
26  
27  
28  
29  
30  
31  
32  
33  
34  
35  
36  
37  
38  
39  
40  
41  
42  
43  
44  
45  
46  
47  
48  
49  
50  
51  
52  
53  
54  
55  
56  
57  
58  
59  
60

For peer review only

1  
2  
3  
4  
5  
6  
7  
8  
9  
10  
11  
12  
13  
14  
15  
16  
17  
18  
19  
20  
21  
22  
23  
24  
25  
26  
27  
28  
29  
30  
31  
32  
33  
34  
35  
36  
37  
38  
39  
40  
41  
42  
43  
44  
45  
46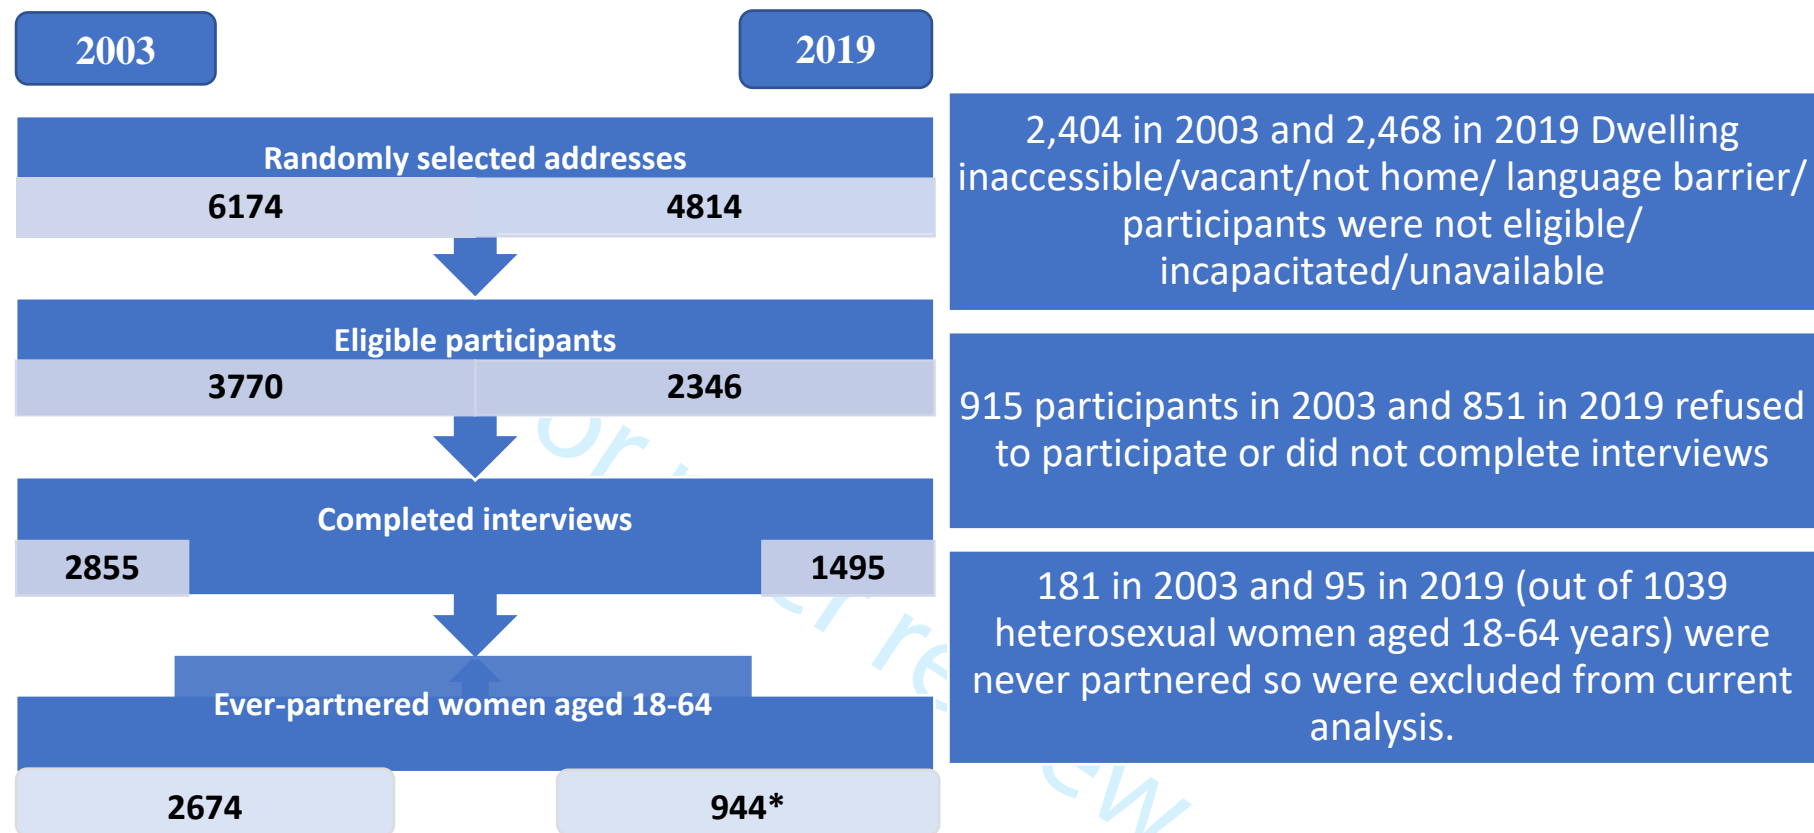

\*For the purpose of this paper, we only included women aged 18-64 years from the 2019 survey.

Supplementary Table 1. Definition of lifetime and past 12-month physical and sexual IPV, sociodemographic factors, attitude toward violence against women and gender roles, and help seeking behaviours in the 2003 and 2019 surveys

| Variable                                       | Definition                                                                                                                                                                                                                                                                                                                                                                                                                              |
|------------------------------------------------|-----------------------------------------------------------------------------------------------------------------------------------------------------------------------------------------------------------------------------------------------------------------------------------------------------------------------------------------------------------------------------------------------------------------------------------------|
| <b>Ever-partnered</b>                          | If they had ever been married, ever lived with, or were currently with a regular sexual partner.                                                                                                                                                                                                                                                                                                                                        |
| <b>Lifetime Physical IPV</b>                   | Participants were categorised as experiencing lifetime physical IPV if they reported having experienced one or more of the following moderate or severe acts of physical violence.<br><br><b>Moderate:</b> Have been slapped or had something thrown at or have been pushed, shoved, or had their hair pulled<br><br><b>Severe:</b> Have been kicked, dragged, beaten up, hit with fist or something else, choked or burnt              |
| <b>12-Month Physical IPV</b>                   | Participants were categorised as experiencing 12-month physical IPV if they reported having experienced one or more acts of the physical IPV in the last 12 months prior to the data collection                                                                                                                                                                                                                                         |
| <b>Sexual IPV</b>                              | Participants were categorised as experiencing lifetime sexual IPV if they reported having experienced one or more of the following acts: being physically forced to have sexual intercourse when the woman did not want to; having sexual intercourse because she was afraid of what her partner might do or being forced to do something sexual that she found degrading or humiliating.                                               |
| <b>12-Month Sexual IPV</b>                     | Participants were categorised as experiencing 12-month sexual IPV if they reported having experienced one or more acts of the sexual IPV in the last 12 months prior to the data collection                                                                                                                                                                                                                                             |
| <b>Independent source of income</b>            | Have access to income from wages or investments, retirement income (yes or no).                                                                                                                                                                                                                                                                                                                                                         |
| <b>Deprivation level</b>                       | Taken from NZ index of multiple deprivation (IMD) <sup>44</sup> which used a combination of routinely collected data from government departments and census data in seven domains (i.e. employment, income, crime, housing, health, education, and access to services) to develop a measure of deprivation at the neighborhood level. Participants were classified in three groups: living in least, moderately and most deprived area. |
| <b>Attitudes toward a man hitting his wife</b> | Participant opinion on six conditions under which hitting or beating one's wife was considered justified : she doesn't complete her household work to his satisfaction; she disobeys him; she refuses to have sex with him; she ask him whether he has other girlfriends; he suspects that she is unfaithful; he finds out that she has been unfaithful. Response options were yes and no.                                              |
| <b>Attitudes toward gender roles</b>           | Participant's attitude about acceptable behaviour for men and women in relationships, and views on family issues being made public: A good wife obeys her husband even if she disagrees; family problems should only be discussed with people in the family; it is important for a man to show his partner who is boss; a woman should be able to choose her own friends even                                                           |



| Variable                     | Definition                                                                                                                                                                                             |
|------------------------------|--------------------------------------------------------------------------------------------------------------------------------------------------------------------------------------------------------|
|                              | if her husband disapproves; it is a wife's obligation to have sex with her husband even if she doesn't feel like it                                                                                    |
| <b>Formal help-seeking</b>   | Contact with service agencies including: police, lawyers, courts, health professionals and mental health workers, or NGOs and community based service providers, including Women's Refuges, and Marae. |
| <b>Informal help seeking</b> | Support from family, friends, neighbours, or workmates.                                                                                                                                                |

For peer review only

**STROBE 2007 (v4) checklist of items to be included in reports of observational studies in epidemiology\***  
**Checklist for cohort, case-control, and cross-sectional studies (combined)**

| Section/Topic             | Item # | Recommendation                                                                                                                                                                                                                                                                                                                                                                                                                                                         | Reported on page #     |
|---------------------------|--------|------------------------------------------------------------------------------------------------------------------------------------------------------------------------------------------------------------------------------------------------------------------------------------------------------------------------------------------------------------------------------------------------------------------------------------------------------------------------|------------------------|
| Title and abstract        | 1      | (a) Indicate the study's design with a commonly used term in the title or the abstract                                                                                                                                                                                                                                                                                                                                                                                 | 1                      |
|                           |        | (b) Provide in the abstract an informative and balanced summary of what was done and what was found                                                                                                                                                                                                                                                                                                                                                                    | 1                      |
| <b>Introduction</b>       |        |                                                                                                                                                                                                                                                                                                                                                                                                                                                                        |                        |
| Background/rationale      | 2      | Explain the scientific background and rationale for the investigation being reported                                                                                                                                                                                                                                                                                                                                                                                   | 2-4                    |
| Objectives                | 3      | State specific objectives, including any pre-specified hypotheses                                                                                                                                                                                                                                                                                                                                                                                                      | 4                      |
| <b>Methods</b>            |        |                                                                                                                                                                                                                                                                                                                                                                                                                                                                        |                        |
| Study design              | 4      | Present key elements of study design early in the paper                                                                                                                                                                                                                                                                                                                                                                                                                | 4                      |
| Setting                   | 5      | Describe the setting, locations, and relevant dates, including periods of recruitment, exposure, follow-up, and data collection                                                                                                                                                                                                                                                                                                                                        | 4-5                    |
| Participants              | 6      | (a) <i>Cohort study</i> —Give the eligibility criteria, and the sources and methods of selection of participants. Describe methods of follow-up<br><i>Case-control study</i> —Give the eligibility criteria, and the sources and methods of case ascertainment and control selection. Give the rationale for the choice of cases and controls<br><i>Cross-sectional study</i> —Give the eligibility criteria, and the sources and methods of selection of participants | 4-5                    |
|                           |        | (b) <i>Cohort study</i> —For matched studies, give matching criteria and number of exposed and unexposed<br><i>Case-control study</i> —For matched studies, give matching criteria and the number of controls per case                                                                                                                                                                                                                                                 | NA                     |
| Variables                 | 7      | Clearly define all outcomes, exposures, predictors, potential confounders, and effect modifiers. Give diagnostic criteria, if applicable                                                                                                                                                                                                                                                                                                                               | 6, Supplementary table |
| Data sources/ measurement | 8*     | For each variable of interest, give sources of data and details of methods of assessment (measurement). Describe comparability of assessment methods if there is more than one group                                                                                                                                                                                                                                                                                   | 6, Supplementary table |
| Bias                      | 9      | Describe any efforts to address potential sources of bias                                                                                                                                                                                                                                                                                                                                                                                                              | 7                      |
| Study size                | 10     | Explain how the study size was arrived at                                                                                                                                                                                                                                                                                                                                                                                                                              | 5                      |
| Quantitative variables    | 11     | Explain how quantitative variables were handled in the analyses. If applicable, describe which groupings were chosen and why                                                                                                                                                                                                                                                                                                                                           | 6-7                    |
| Statistical methods       | 12     | (a) Describe all statistical methods, including those used to control for confounding                                                                                                                                                                                                                                                                                                                                                                                  | 6-7                    |
|                           |        | (b) Describe any methods used to examine subgroups and interactions                                                                                                                                                                                                                                                                                                                                                                                                    | 6-7                    |
|                           |        | (c) Explain how missing data were addressed                                                                                                                                                                                                                                                                                                                                                                                                                            | 7                      |
|                           |        | (d) <i>Cohort study</i> —If applicable, explain how loss to follow-up was addressed<br><i>Case-control study</i> —If applicable, explain how matching of cases and controls was addressed                                                                                                                                                                                                                                                                              | NA                     |

|                          |     |                                                                                                                                                                                                              |                     |
|--------------------------|-----|--------------------------------------------------------------------------------------------------------------------------------------------------------------------------------------------------------------|---------------------|
|                          |     | <i>Cross-sectional study</i> —If applicable, describe analytical methods taking account of sampling strategy                                                                                                 |                     |
|                          |     | (e) Describe any sensitivity analyses                                                                                                                                                                        | NA                  |
| <b>Results</b>           |     |                                                                                                                                                                                                              |                     |
| Participants             | 13* | (a) Report numbers of individuals at each stage of study—eg numbers potentially eligible, examined for eligibility, confirmed eligible, included in the study, completing follow-up, and analysed            | 4-5                 |
|                          |     | (b) Give reasons for non-participation at each stage                                                                                                                                                         | 4-5                 |
|                          |     | (c) Consider use of a flow diagram                                                                                                                                                                           |                     |
| Descriptive data         | 14* | (a) Give characteristics of study participants (eg demographic, clinical, social) and information on exposures and potential confounders                                                                     | Page 5, Table 1     |
|                          |     | (b) Indicate number of participants with missing data for each variable of interest                                                                                                                          |                     |
| Outcome data             | 15* | <i>Cohort study</i> —Report numbers of outcome events or summary measures over time                                                                                                                          | NA                  |
|                          |     | <i>Case-control study</i> —Report numbers in each exposure category, or summary measures of exposure                                                                                                         | NA                  |
|                          |     | <i>Cross-sectional study</i> —Report numbers of outcome events or summary measures                                                                                                                           | Table 2 & Table 3   |
| Main results             | 16  | (a) Give unadjusted estimates and, if applicable, confounder-adjusted estimates and their precision (eg, 95% confidence interval). Make clear which confounders were adjusted for and why they were included | Table 2 and Table 3 |
|                          |     | (b) Report category boundaries when continuous variables were categorized                                                                                                                                    | NA                  |
|                          |     | (c) If relevant, consider translating estimates of relative risk into absolute risk for a meaningful time period                                                                                             | NA                  |
| Other analyses           | 17  | Report other analyses done—eg analyses of subgroups and interactions, and sensitivity analyses                                                                                                               | NA                  |
| <b>Discussion</b>        |     |                                                                                                                                                                                                              |                     |
| Key results              | 18  | Summarise key results with reference to study objectives                                                                                                                                                     | 19                  |
| Limitations              | 19  | Discuss limitations of the study, taking into account sources of potential bias or imprecision. Discuss both direction and magnitude of any potential bias                                                   | 21                  |
| Interpretation           | 20  | Give a cautious overall interpretation of results considering objectives, limitations, multiplicity of analyses, results from similar studies, and other relevant evidence                                   | 20                  |
| Generalisability         | 21  | Discuss the generalisability (external validity) of the study results                                                                                                                                        | 19                  |
| <b>Other information</b> |     |                                                                                                                                                                                                              |                     |
| Funding                  | 22  | Give the source of funding and the role of the funders for the present study and, if applicable, for the original study on which the present article is based                                                | 2                   |

\*Give information separately for cases and controls in case-control studies and, if applicable, for exposed and unexposed groups in cohort and cross-sectional studies.

**Note:** An Explanation and Elaboration article discusses each checklist item and gives methodological background and published examples of transparent reporting. The STROBE checklist is best used in conjunction with this article (freely available on the Web sites of PLoS Medicine at <http://www.plosmedicine.org/>, Annals of Internal Medicine at <http://www.annals.org/>, and Epidemiology at <http://www.epidem.com/>). Information on the STROBE Initiative is available at [www.strobe-statement.org](http://www.strobe-statement.org).

# BMJ Open

## Change in prevalence rates of physical and sexual intimate partner violence against women: Data from two cross-sectional studies in New Zealand, 2003 and 2019.

|                                 |                                                                                                                                                                                                                                                                                                                                                                                                                                                                                                                                                                                                         |
|---------------------------------|---------------------------------------------------------------------------------------------------------------------------------------------------------------------------------------------------------------------------------------------------------------------------------------------------------------------------------------------------------------------------------------------------------------------------------------------------------------------------------------------------------------------------------------------------------------------------------------------------------|
| Journal:                        | <i>BMJ Open</i>                                                                                                                                                                                                                                                                                                                                                                                                                                                                                                                                                                                         |
| Manuscript ID                   | bmjopen-2020-044907.R2                                                                                                                                                                                                                                                                                                                                                                                                                                                                                                                                                                                  |
| Article Type:                   | Original research                                                                                                                                                                                                                                                                                                                                                                                                                                                                                                                                                                                       |
| Date Submitted by the Author:   | 25-Feb-2021                                                                                                                                                                                                                                                                                                                                                                                                                                                                                                                                                                                             |
| Complete List of Authors:       | Fanslow, Janet; The University of Auckland Faculty of Medical and Health Sciences, School of Population Health<br>Hashemi, Ladan; The University of Auckland Faculty of Medical and Health Sciences, School of Population Health<br>Malihi, Zarintaj; The University of Auckland Faculty of Medical and Health Sciences, School of Population Health<br>Gulliver, Pauline; The University of Auckland Faculty of Medical and Health Sciences, School of Population Health<br>McIntosh, Tracey; The University of Auckland Faculty of Arts, School of Māori Studies and Pacific Studies, Faculty of Arts |
| <b>Primary Subject Heading</b>: | Public health                                                                                                                                                                                                                                                                                                                                                                                                                                                                                                                                                                                           |
| Secondary Subject Heading:      | Epidemiology                                                                                                                                                                                                                                                                                                                                                                                                                                                                                                                                                                                            |
| Keywords:                       | EPIDEMIOLOGY, PUBLIC HEALTH, SOCIAL MEDICINE                                                                                                                                                                                                                                                                                                                                                                                                                                                                                                                                                            |
|                                 |                                                                                                                                                                                                                                                                                                                                                                                                                                                                                                                                                                                                         |

SCHOLARONE™  
Manuscripts



I, the Submitting Author has the right to grant and does grant on behalf of all authors of the Work (as defined in the below author licence), an exclusive licence and/or a non-exclusive licence for contributions from authors who are: i) UK Crown employees; ii) where BMJ has agreed a CC-BY licence shall apply, and/or iii) in accordance with the terms applicable for US Federal Government officers or employees acting as part of their official duties; on a worldwide, perpetual, irrevocable, royalty-free basis to BMJ Publishing Group Ltd ("BMJ") its licensees and where the relevant Journal is co-owned by BMJ to the co-owners of the Journal, to publish the Work in this journal and any other BMJ products and to exploit all rights, as set out in our [licence](#).

The Submitting Author accepts and understands that any supply made under these terms is made by BMJ to the Submitting Author unless you are acting as an employee on behalf of your employer or a postgraduate student of an affiliated institution which is paying any applicable article publishing charge ("APC") for Open Access articles. Where the Submitting Author wishes to make the Work available on an Open Access basis (and intends to pay the relevant APC), the terms of reuse of such Open Access shall be governed by a Creative Commons licence – details of these licences and which [Creative Commons](#) licence will apply to this Work are set out in our licence referred to above.

Other than as permitted in any relevant BMJ Author's Self Archiving Policies, I confirm this Work has not been accepted for publication elsewhere, is not being considered for publication elsewhere and does not duplicate material already published. I confirm all authors consent to publication of this Work and authorise the granting of this licence.

1  
2  
3 **Change in prevalence rates of physical and sexual intimate partner violence against**  
4 **women: Data from two cross-sectional studies in New Zealand, 2003 and 2019**  
5  
6

7 Janet Fanslow, <sup>a</sup> Ladan Hashemi, <sup>a</sup> Zarintaj Malihi <sup>a</sup>, Pauline Gulliver, <sup>a</sup> and Tracey McIntosh<sup>b</sup>

8  
9 <sup>a</sup> *Social and Community Health, School of Population Health, Faculty of Medical and Health*  
10 *Sciences, University of Auckland, Auckland, New Zealand*  
11

12 <sup>b</sup> *School of Māori Studies and Pacific Studies, Faculty of Arts, University of Auckland,*  
13 *Auckland, New Zealand*  
14  
15

16  
17  
18 \*Corresponding Author:

19 Janet L. Fanslow

20  
21  
22 Social and Community Health  
23 School of Population Health  
24 University of Auckland  
25 Private Bag 92019  
26 Auckland, 1142  
27 Auckland, New Zealand  
28

29  
30 [j.fanslow@auckland.ac.nz](mailto:j.fanslow@auckland.ac.nz)  
31  
32

33  
34 word count=3886  
35  
36

37  
38 keywords: change, prevalence rates, intimate partner violence, help-seeking, attitudes.  
39  
40  
41  
42  
43  
44  
45  
46  
47  
48  
49  
50  
51  
52  
53  
54  
55  
56  
57  
58  
59  
60

## Change in prevalence rates of physical and sexual intimate partner violence against women: Data from two cross-sectional studies in New Zealand, 2003 and 2019

### Abstract

**Objectives:** To explore changes in reported prevalence of physical and sexual intimate partner violence (IPV) between 2003 and 2019. The impact of socio-demographic differences between the two samples and between group differences were also examined. Changes in attitudes supportive of violence and in help-seeking behaviour following disclosure were also explored.

**Design:** Two cross-sectional studies

**Setting and participants:** Cross-sectional studies on family violence conducted in New Zealand in 2003 and 2019. Ever-partnered female respondents aged 18-64 years old were included (2003 n=2,674, 2019 n=944).

**Main outcome measures:** Prevalence rates of lifetime and past 12-month physical and sexual IPV, attitudes towards gender roles and acceptability of a man hitting his wife, help sought, and received following disclosure were compared between the study years.

**Results:** Lifetime prevalence of physical IPV was unchanged between 2003 and 2019 (AOR=0.89; 95% CI=0.73-1.08). There was a significant decrease in the proportion of women who reported experiencing 12-month physical IPV (AOR=0.53; 95% CI=0.29-0.97). Small reductions in rates for lifetime sexual IPV were also observed (AOR=0.74; 95%CI=0.59-0.95). In 2019, fewer women agreed with one or more statements supportive of traditional gender roles (48.1%; 95% CI= 45.7-50.5 in 2003; 38.4.3% (95% CI=33.8-43.2 in 2019). A significant decrease was noted in the proportion of women who sought help from informal sources (from 71.3% [95% CI= 68.1-74.2] in 2003 to 64.6% [95% CI= 58.7-70.1] in 2019). No significant changes in seeking help from formal sources, or perceived helpfulness from any source were noted.

**Conclusion:** While the reduction in 12-month physical and lifetime sexual IPV are positive, prevention efforts need to be established, maintained and strengthened to address the substantial lifetime prevalence of IPV. Efforts to strengthen responses from formal and informal sources continue to be needed.

### Strengths and limitations of this study

- The current investigation used large, representative samples of women from population-based surveys in 2003 and 2019.
- Regular and comparable surveys of violence exposure, agreement to attitudes supportive of violence and help-seeking behaviours provide an understanding of the effectiveness of population-based policies and programmes.
- True prevalence estimates may be higher in both surveys as it is expected that women in severely abusive relationships would be unable or unwilling to participate.
- Observed changes may reflect societal changes or environmental factors not considered in this investigation.
- Regular and comparable surveys of violence exposure are required to determine if the observed changes are sustained and represent a trend.

### Introduction

Intimate Partner Violence (IPV) has been reported by the UN Secretary-General (2006) as “the most common form of violence experienced by women globally.”<sup>1</sup> IPV includes physical and sexual violence, as well as psychological abuse, controlling behaviour and economic abuse.

Efforts to respond to IPV in high income countries include the introduction of legislation or national action plans, and strengthening the non-for-profit sector to respond to the violence experienced.<sup>2</sup> However, the effectiveness of these strategies is not clear, as there is a lack of consistent and reliable data available to monitor changes in the prevalence of IPV over time.

The limited research available tends to rely on analysis of IPV homicide data, or other forms of administrative data from agencies such as health providers, police or courts.<sup>2</sup> While providing useful insights, these data do not reflect the magnitude of the problem at the population level, as many who experience IPV frequently do not present to services, or the underlying cause of their presentation may not be identified or recorded.<sup>2, 3</sup>

Other attempts to measure changes in IPV occurrence over time have relied on data from general crime victimisation surveys,<sup>4</sup> but the overall framing of these questionnaires (i.e., surveys about ‘crime’) tends to lower the reporting of the violent behaviours within intimate relationships.<sup>2, 3</sup> Surveys conducted for other purposes (e.g., health surveys) which include a dedicated module on family violence provide some information, but can also be problematic,



1  
2  
3 as space limitations for specific modules means that they might not be able to include questions  
4 that canvas the full range of violent experiences.<sup>5</sup>

6 The emerging consensus is that ‘population-based stand-alone surveys are the instruments of  
7 choice’ for collecting statistics on violence against women.<sup>6</sup> To date, specific violence against  
8 women surveys have been carried out in several high-income countries (for examples U.S.A.,<sup>7</sup>  
9 Canada,<sup>8</sup> Australia,<sup>9</sup> European Union,<sup>10</sup> Finland,<sup>11, 12</sup> Spain,<sup>13</sup> New Zealand<sup>14</sup>). However, with  
10 an exception of Australia and Finland, the surveys have generally been one-off efforts and thus  
11 do not allow for time-related comparisons. Without regular, comparable surveys, it is not  
12 possible to determine if there are overall changes in the occurrence of IPV, or if there are  
13 differential patterns of change for specific sub-groups within the population.

14 According to the World Health Organization, violence results from the complex interplay  
15 between individual, relationship, social, cultural and environmental factors.<sup>15</sup> The ecological  
16 model has been important in helping determine risk and protective factors associated with  
17 violence occurrence, but also holds promise for prevention, as it carries the assumption that  
18 changes in contributing factors can potentially lead to changes in prevalence.<sup>16</sup> To date, the  
19 limited research that has explored differences in the prevalence of IPV over time has suggested  
20 that population-level changes in demographic factors, such as shifts in age, education,  
21 relationship status, and socio-economic factors may contribute to the observed prevalence  
22 changes.<sup>4, 6, 17, 18</sup> However, changes in environmental and social norms that may condone or  
23 help perpetuate violence, and associated effects on violence occurrence have received scant  
24 attention in the research.

25  
26  
27  
28  
29  
30  
31  
32  
33  
34  
35  
36  
37  
38  
39  
40  
41  
42  
43  
44  
45  
46  
47  
48  
49  
50  
51  
52  
53  
54  
55  
56  
57  
58  
59  
60

1  
2  
3  
4  
5  
6  
7  
8  
9  
10  
11  
12  
13  
14  
Community-level norms, such as acceptance of ‘traditional’ gender roles and beliefs in the justification of ‘circumstances in which it is acceptable for a man to hit his wife’ are associated with perpetration of IPV.<sup>19</sup> In some countries, women’s acceptance of these attitudes has been found to be associated with increased risk of IPV victimisation.<sup>20</sup> For these reasons, attitudes have been a key target of community education campaigns aimed at preventing violence against women.<sup>21</sup> However, to date, there has been little examination of the effectiveness of these initiatives at changing attitudes, or on any associated changes in violence rates.<sup>21-23</sup>

15  
16  
17  
18  
19  
20  
21  
22  
23  
24  
25  
26  
27  
28  
29  
30  
31  
32  
33  
New Zealand is one of few high-income countries where more than one comprehensive population-based survey of violence against women has been conducted: the first survey was conducted in 2003, and the second survey in 2019. Between the two surveys, a series of actions were taken to address family violence including; legislation (e.g. amendments to family violence law and protection for victims act), and prevention campaigns (e.g. the Family Violence: It’s not ok national campaign, and the ACC-funded mates and dates high schools programme on healthy relationships). Many of these initiatives have focussed on addressing physical and sexual violence and have included strong messaging about the importance of help-seeking by those experiencing violence. Comparable surveys on attitudes supporting violence over time may provide evidence about the impact of such campaigns at the population level.

34  
35  
36  
37  
38  
39  
40  
41  
42  
43  
44  
45  
46  
47  
48  
49  
In the current study, using data from two New Zealand cross-sectional population-based surveys we aimed to: (a) describe changes in the reported prevalence rates of physical and sexual IPV between 2003 and 2019, (b) examine whether changes in women’s sociodemographic characteristics were associated with changes in IPV prevalence rates, and (c) determine whether changes in the reported prevalence rates were consistent across population subgroups. We also sought to determine if there were (d) changes in attitudes supportive of violence and (e) changes in help-seeking for those who reported experiencing IPV.

## 50 51 52 **Method**

### **Procedure and participants**

53  
54  
55  
56  
57  
58  
59  
60  
Data was drawn from two cross-sectional studies on family violence conducted in New Zealand in 2003 and 2019. A comprehensive description of the methods used in the 2003 and 2019 surveys have been previously presented.<sup>14,24</sup> A brief description of the two surveys is presented here.

1  
2  
3 The 2003 study was conducted in Auckland and Waikato regions. For the 2019 study,  
4 Northland was also included in the sampling.

5  
6 Sampling strategies were similar in both surveys. A population-based cluster sampling scheme  
7 with a fixed number of dwellings per cluster was used for both studies. Primary sampling units  
8 (PSUs) were based on meshblock boundaries which contain between 50 and 100 dwellings.  
9  
10 The starting point consisted of a randomly selected street and street number within each PSU.  
11  
12 Interviewers made up to seven visits to each selected household to identify and recruit study  
13 participants. Non-residential, aged-care and short-term residential properties were excluded  
14 from both surveys. Interviewer training and support procedures were comparable across survey  
15 waves.  
16  
17  
18  
19

20 **Eligibility:** To be eligible to participate in the survey, household members needed to be able  
21 to speak conversational English, have lived in the household for at least one month and slept  
22 in the house for four or more nights a week.  
23

24  
25 Of the households invited, 88.3% in 2003 and 78% in 2019 agreed to participate. Of the eligible  
26 women, 75.8% in 2003 and 63.7% in 2019 participated, yielding an overall response rate of  
27 66.9% in 2003 and 63.7% in 2019. Figure 1 demonstrates the number of people invited and  
28 those who were interviewed and included in the analyses for each survey year.  
29

30  
31 Participants of the 2003 study were 2855 women aged 18-64 years. In 2019, the eligible  
32 population was expanded to include women and men aged 16 years and older resulting in 2,888  
33 completed interviews (n=1464 women, n=1423 men, n=1 other). For the purpose of this paper,  
34 only ever-partnered women aged 18-64 years from each sample were included, equivalent to  
35 almost 94% of all women aged 18-64 years surveyed in both waves (2003, n= 2674; 2019,  
36 n=944).  
37  
38  
39  
40  
41  
42  
43  
44

45 **Representativeness:** In both surveys, the ethnicity, marital status, and area-level deprivation  
46 distribution of the samples were closely comparable to the general population, however both  
47 samples were under-represented for younger women (ages 20-29 in 2003, 16-29 in 2019).<sup>14, 24</sup>  
48 Demographic characteristics of ever-partnered women aged 18-64 years in the 2003 and 2019  
49 surveys are presented in Table 1.  
50  
51  
52  
53  
54

### 55 **Safety and ethics considerations**

56 Ethics and safety recommendations for research on violence against women were followed  
57 throughout the research.<sup>25</sup> One individual was randomly selected from each household for the  
58 interview. In households with more than one eligible resident, the participant was randomly  
59  
60

1  
2  
3 selected. Interviews were conducted in privacy with no one over the age of two years present.  
4  
5 At the completion of the interview, interviewers provided all respondents with a list of  
6  
7 approved support agencies regardless of disclosure status. Written informed consent was  
8  
9 obtained from all participants.

10  
11 Ethics approval was granted through the University of Auckland human participants' ethics  
12  
13 committee (reference number 2002/199 for the 2003 study, and 2015/018244 for the 2019  
14  
15 study).

### 16 17 **Patient and Public involvement**

18  
19 No patients or members of the public were involved in the design, conduct or reporting or  
20  
21 dissemination plans of our research.

### 22 23 **Study instrument and measures**

24  
25 To collect data, the WHO Multi-Country Study on Women's Health and Domestic Violence  
26  
27 Against Women (WHO MCS) <sup>26</sup> was used in both surveys.

28  
29 'Intimate partners' included male current or ex-partners that the women were married to or had  
30  
31 lived with, or current regular male sexual partners. Definitions are presented in Supplementary  
32  
33 Table 1 for: physical and sexual IPV; socio-demographic characteristics; attitudes towards  
34  
35 gender roles, acceptance of attitudes justifying a man hitting his wife, and sources of help  
36  
37 sought (who was told about the IPV) and help received (sources who provided help. All  
38  
39 questions used for analyses were identical in the two surveys.

### 40 41 **Analytic procedure**

42  
43 To explore whether there were any underlying differences in demographic characteristics of  
44  
45 the respondents at the two time periods, the 2003 and 2019 samples were compared in terms  
46  
47 of age, relationship status, education attainment, access to an independent source of income,  
48  
49 and area-level deprivation using chi square tests.

50  
51 Then, the prevalence rates of physical and sexual IPV were compared between two samples  
52  
53 with results presented as percentages with 95% confidence intervals (CIs). As the results for  
54  
55 "moderate" and "severe" physical IPV showed similar patterns to any physical IPV, in the  
56  
57 following analyses, only the results for *any* physical IPV are presented. Any act of sexual IPV  
58  
59 was considered as severe. To identify evidence of differences in the estimated prevalence over  
60  
61 time, odds ratio (OR) and 95% CIs for reported experience of physical and sexual IPV were  
62  
63 calculated using univariate logistic regression models, with the study year as the predictor. The

1  
2  
3 same procedure was followed for assessing differences in women's attitudes towards gender  
4 roles, attitudes towards acceptability of a man hitting his wife, help sought, and help received  
5 between the study years. For help-seeking variables, the analyses were restricted to women  
6 who reported lifetime experience of physical or sexual IPV only.  
7  
8

9  
10 Then, to determine if the noted differences in the prevalence rates of IPV between the two  
11 study years found in the univariate analyses remained significant after controlling for  
12 sociodemographic characteristics, the following steps were taken:  
13

- 14 - First, the association between each socio-demographic characteristic and each type of  
15 IPV (lifetime or 12-month physical and sexual IPV) was explored using univariate  
16 logistic regression models with results presented as unadjusted odds ratios (OR) with  
17 95% CIs.  
18
- 19 - Second, multivariate analyses were conducted, with the study year and  
20 sociodemographic characteristics included, and results were presented as adjusted odds  
21 ratios (AOR) with 95% CIs.  
22

23  
24 Finally, to determine whether the noted changes in the reported prevalence rates were  
25 consistent across population subgroups, multivariate logistic regression models with  
26 interaction terms (between each sociodemographic characteristic and the study year) were  
27 tested. Potential confounders (e.g. age, education, relationship status, independent income, and  
28 area-level deprivation) and the study year were included in these analyses.  
29  
30

31  
32 All analyses were performed on a pooled dataset of the two samples. Missing data including:  
33 do not know, do not remember, and no responses were excluded from all analyses. Less than  
34 4% of any variable had missing data in both surveys. All analyses were conducted using  
35 Stata/SE 15.1<sup>27</sup> survey commands to allow for stratification by sample location (region),  
36 clustering by primary sampling units (PSU), and weighting of data to account for the number  
37 of eligible participants in each household.  
38  
39

## 40 41 42 43 44 45 46 47 48 49 50 51 52 53 54 **Results**

55 Differences between two study samples in terms of sociodemographic characteristics are  
56 presented in Table 1. In general, there were more women over 45 years in 2019 (51.4%)  
57 compared with 2003 (39.3%). Additionally, a higher proportion of the sample had attained  
58  
59  
60

1  
2  
3 tertiary education in 2019 (65.1%) compared with 44.8% in 2003. A smaller proportion of  
4 women in 2019 reporting having an independent source of income (72.5%) compared to 79.5%  
5 in 2003.  
6  
7  
8  
9

10  
11 Table 1. Demographic characteristics of ever-partnered women aged 18-64 years in 2003 and  
12 2019 surveys

|                               | 2003          | 2019         | p value |
|-------------------------------|---------------|--------------|---------|
| <b>Total sample</b>           | <b>n=2674</b> | <b>n=944</b> |         |
| <b>Age categories</b>         | n (%)*        | n (%)*       | 0.001   |
| 18-24                         | 182 (8.6)     | 45 (6.7)     |         |
| 25-34                         | 581(21.9)     | 169 (17.4)   |         |
| 35-44                         | 857(30.2)     | 218 (21.5)   |         |
| 45-54                         | 637(24.6)     | 268 (30.8)   |         |
| 55-64                         | 414(14.7)     | 244 (23.3)   |         |
| <b>Relationship status</b>    |               |              | 0.4     |
| Married                       | 1685 (61.4)   | 601 (63.3)   |         |
| Cohabiting                    | 574 (22.1)    | 201 (21.2)   |         |
| Divorced/separated/ broken up | 353 (14.3)    | 117 (12.6)   |         |
| Widowed                       | 60 (2.1)      | 25 (2.9)     |         |
| <b>Education attainment</b>   |               |              | 0.001   |
| Primary /Secondary            | 1478 (55.2)   | 315 (34.8)   |         |
| Higher                        | 1187 (44.8)   | 625 (65.1)   |         |
| <b>Independent income</b>     |               |              | 0.0007  |
| Yes                           | 2122 (79.5)   | 696 (72.5)   |         |
| No                            | 551 (20.4)    | 248 (27.0)   |         |
| <b>Area—level deprivation</b> |               |              | 0.1     |
| Least deprived                | 914 (33.6)    | 270 (26.8)   |         |
| Moderately deprived           | 1045 (38.8)   | 393 (39.8)   |         |
| Most deprived                 | 708 (27.5)    | 281 (33.4)   |         |

37 Data are n (Col%)

38 \*Weighted % are presented  
39  
40  
41  
42  
43  
44  
45  
46  
47  
48  
49  
50  
51  
52  
53  
54  
55  
56  
57  
58  
59  
60

Table 2. Characteristics of women reporting lifetime and past-12 month Physical IPV in the pooled database from two cross-sectional studies in New Zealand

|                                  | Lifetime                |                         | Univariate Model Odds Ratio (95%CI) | **Multivariate Model AOR (95%CI) | Past 12-month         |                     | Univariate Model Odds Ratio (95%CI) | **Multivariate Model AOR (95%CI) |
|----------------------------------|-------------------------|-------------------------|-------------------------------------|----------------------------------|-----------------------|---------------------|-------------------------------------|----------------------------------|
|                                  | 2003 n % (95%CI)*       | 2019 n % (95%CI)*       |                                     |                                  | 2003 n % (95%CI)*     | 2019 n % (95%CI)*   |                                     |                                  |
| <b>Year (ref=2003)</b>           | 856<br>32.2 (30.2-34.2) | 291<br>29.1 (25.8-32.7) | 0.86<br>(0.71-1.04)                 | 0.89 (0.73-1.08)                 | 118<br>5.0 (4.1-6.1)  | 19<br>2.4 (1.5-3.8) | 0.46 (0.27-0.79)                    | 0.53 (0.29-0.97)                 |
| <b>Age categories</b>            |                         |                         |                                     |                                  |                       |                     |                                     |                                  |
| 18-24                            | 53<br>28.1 (21.6-35.7)  | 14<br>24.4 (13.3-40.3)  | 1.00                                | 1.00                             | 18<br>9.4 (5.7-14.9)  | 4<br>9.7 (3.4-24.6) | 1.00                                | 1.00                             |
| 25-34                            | 210<br>37.7 (33.6-42.0) | 36<br>20.6 (15.0-27.6)  | 1.36 (0.95-1.95)                    | 2.11 (1.43-3.13)                 | 49<br>10.0 (7.5-13.3) | 4<br>2.4 (0.8-6.7)  | 0.87 (0.48-1.55)                    | 1.09 (0.59-2.02)                 |
| 35-44                            | 278<br>32.9 (29.4-36.5) | 71<br>32.9 (25.9-40.8)  | 1.31 (0.92-1.85)                    | 2.58 (1.75-3.82)                 | 35<br>4.7 (3.2-6.9)   | 2<br>0.7 (0.2-3.1)  | 0.39 (0.21-0.73)                    | 0.60 (0.29-1.21)                 |
| 45-54                            | 201<br>30.9 (27.2-34.9) | 83<br>28.0 (22.2-34.6)  | 1.14 (0.80-1.63)                    | 2.38 (1.60-3.54)                 | 10<br>1.7 (0.9-3.2)   | 3<br>1.7 (0.5-5.3)  | 0.16 (0.08-0.35)                    | 0.28 (0.12-0.64)                 |
| 55-64                            | 113<br>27.3 (23.0-32.0) | 87<br>34.9 (29.0-41.4)  | 1.15 (0.81-1.65)                    | 2.37 (1.58-3.56)                 | 6<br>1.3 (0.6-2.9)    | 6<br>2.6 (1.1-5.8)  | 0.17 (0.08-0.37)                    | 0.30 (0.13-0.68)                 |
| <b>Relationship status</b>       |                         |                         |                                     |                                  |                       |                     |                                     |                                  |
| Married                          | 358<br>21.2 (19.1-23.4) | 125<br>19.8 (16.5-23.7) | 1.00                                | 1.00                             | 39<br>2.5 (1.8-3.4)   | 6<br>1.1 (0.4-2.6)  | 1.00                                | 1.00                             |
| Cohabiting                       | 272<br>46.7 (42.3-51.2) | 85<br>40.3(33.0-48.0)   | 3.11 (2.58-3.76)                    | 3.75 (3.04-4.64)                 | 46<br>9.1 (6.6-12.3)  | 5<br>3.6 (1.4-8.9)  | 3.88 (2.48-6.06)                    | 2.68 (1.58-4.54)                 |
| Divorced/separated/<br>broken up | 207<br>57.8 (52.4-63.0) | 69<br>53.4 (43.2-63.2)  | 4.98 (3.98-6.22)                    | 4.84 (3.84-6.08)                 | 33<br>10.6 (7.4-15.0) | 7<br>6.7 (3.1-14.0) | 5.01 (3.10-8.12)                    | 4.27 (2.63-6.94)                 |
| Widowed                          | 19<br>28.8 (18.9-41.2)  | 12<br>44.1 (25.6-64.4)  | 1.96 (1.22-3.14)                    | 1.71 (1.05-2.78)                 | 0                     | 1<br>2.9 (0.4-18.4) | 0.48 (0.06-3.57)                    | 0.65 (0.08-5.00)                 |
| <b>Education Attainment</b>      |                         |                         |                                     |                                  |                       |                     |                                     |                                  |
| Primary and secondary            | 519<br>34.6 (32.0-37.4) | 108<br>31.1 (24.9-38.1) | 1.00                                | 1.00                             | 77<br>5.5 (4.3-6.8)   | 7<br>3.2 (1.4-7.1)  | 1.00                                | 1.00                             |
| Tertiary level                   | 332<br>28.9 (26.2-31.8) | 182<br>28.1 (24.2-32.3) | 0.78 (0.66-0.91)                    | 0.87 (0.73-1.03)                 | 40<br>4.3 (3.1-6.0)   | 12<br>2.0 (1.1-3.5) | 0.68 (0.47-1.00)                    | 0.82 (0.54-1.25)                 |
| <b>Independent income</b>        |                         |                         |                                     |                                  |                       |                     |                                     |                                  |
| No                               | 135<br>26.0 (21.8-30.7) | 75<br>28.2 (22.4-34.7)  | 1.00                                | 1.00                             | 26<br>6.3 (4.0-9.9)   | 5<br>1.9 (0.7-4.7)  | 1.00                                | 1.00                             |
| Yes                              | 720<br>33.8 (31.5-36.1) | 216<br>29.5 (25.6-33.6) | 1.33 (1.08-1.63)                    | 1.10 (0.90-1.36)                 | 92<br>4.7 (3.8-5.8)   | 14<br>2.6 (1.5-4.5) | 0.85 (0.52-1.38)                    | 0.71 (0.39-1.27)                 |
| <b>Area-level deprivation</b>    |                         |                         |                                     |                                  |                       |                     |                                     |                                  |
| Least deprived                   | 224<br>25.9 (22.8-29.3) | 68<br>22.7 (18.2-27.9)  | 1.00                                | 1.00                             | 26<br>3.3 (2.0-5.3)   | 4<br>1.3 (0.5-3.3)  | 1.00                                | 1.00                             |
| Moderately deprived              | 344                     | 113                     | 1.34 (1.11-1.63)                    | 1.21 (1.00-1.48)                 | 44                    | 8                   | 1.54 (0.89-2.65)                    | 1.34 (0.78-2.28)                 |

|                 |                  |                  |                  |                  |                |               |                  |                  |
|-----------------|------------------|------------------|------------------|------------------|----------------|---------------|------------------|------------------|
|                 | 32.1 (29.0-35.2) | 28.5 (23.5-34.1) |                  |                  | 4.7 (3.5-6.2)  | 3.2 (1.5-6.6) |                  |                  |
| Mostly deprived | 285              | 110              | 1.86 (1.50-2.30) | 1.54 (1.24-1.91) | 48             | 7             | 2.23 (1.29-3.82) | 1.50 (0.89-2.54) |
|                 | 40.1 (36.1-44.2) | 34.9 (27.9-42.7) |                  |                  | 7.8 (5.8-10.3) | 2.3 (1.1-4.8) |                  |                  |

\* Weighted % and 95% CIs are presented.

\*\*AORs (Weighted Adjusted Odds Ratios) are adjusted for age, education, relationship status, area-deprivation level, independent income, and the year of the study

For peer review only



## ***Physical IPV***

### *Changes in physical IPV prevalence rates*

*Lifetime physical IPV prevalence.* The lifetime prevalence of physical IPV remained relatively unchanged between 2003 and 2019, with almost 30% of ever-partnered women aged 18-64 reporting having experienced at least one episode of physical violence (Table 2). After controlling for sociodemographic factors, adjusted odds ratios showed no significant difference in the reported prevalence rates of lifetime physical IPV between the two study years (AOR=0.89; 95%CI=0.73-1.08).

*12-month physical IPV prevalence.* The 12-month prevalence of physical IPV decreased from 5 % in 2003 to 2.4% in 2019 (OR=0.46; 95%CI=0.27-0.79). The adjusted odds ratio showed that, after controlling for sociodemographic factors, the decrease in 12-month physical IPV was attenuated but still remained significant (AOR=0.53; 95%CI=0.29-0.97).

### *Characteristics of women reporting lifetime and past-12 months physical IPV*

#### *Lifetime physical IPV:*

All sociodemographic factors were significantly associated with reporting lifetime physical IPV in the multivariate model, with the exception of “access to independent income” and “educational attainment”. Women aged 25 years and above were more likely to report having experienced at least one act of lifetime physical IPV. Compared with married women, a higher proportion of women who were cohabiting, divorced, or widowed reported experiencing lifetime physical IPV. Similarly, those who were living in the moderately or most deprived areas were more likely to report the experience of lifetime physical IPV compared with those living in the least deprived areas (Table 2).

*Past 12-month physical IPV.* At the multivariate level, age and relationship status were significantly associated with reports of experiencing past 12-month physical IPV. A lower proportion of women aged 45 years and older reported experiencing past 12-month physical IPV compared with those younger than 45 years. A higher proportion of those who were cohabiting or divorced compared with those who were married reported this experience (Table 2).

Table 3. Characteristics of women with lifetime and past-12 month **Sexual IPV** in the pooled database from two cross-sectional studies in New Zealand

|                                  | Lifetime                |                         | Univariate Model Odds Ratio (95%CI) | **Multivariate Model AOR (95%CI) | Past 12-month       |                     | Univariate Model Odds Ratio (95%CI) | **Multivariate Model AOR (95%CI) |
|----------------------------------|-------------------------|-------------------------|-------------------------------------|----------------------------------|---------------------|---------------------|-------------------------------------|----------------------------------|
|                                  | 2003 n % (95%CI)*       | 2019 n % (95%CI)*       |                                     |                                  | 2003 n % (95%CI)*   | 2019 n % (95%CI)*   |                                     |                                  |
| <b>Year (ref=2003)</b>           | 464<br>16.9 (15.4-18.6) | 133<br>13.1 (11.0-15.4) | 0.74<br>(0.59-0.92)                 | 0.74 (0.59-0.95)                 | 38<br>1.8 (1.3-2.6) | 10<br>0.9 (0.5-1.9) | 0.50 (0.23-1.10)                    | 0.50 (0.19-1.35)                 |
| <b>Age categories</b>            |                         |                         |                                     |                                  |                     |                     |                                     |                                  |
| 18-24                            | 25<br>14.2 (9.6-20.5)   | 5<br>7.3 (2.3-20.6)     | 1.00                                | 1.00                             | 8<br>5.6 (2.7-11.1) | 0                   | 1.00                                | 1.00                             |
| 25-34                            | 105<br>17.7 (14.7-21.2) | 18<br>10.3 (6.5-15.8)   | 1.32 (0.83-2.10)                    | 1.92 (1.18-3.14)                 | 13<br>2.8 (1.5-5.2) | 2<br>1.0 (0.2-3.8)  | 0.54 (0.21-1.41)                    | 0.62 (0.23-1.70)                 |
| 35-44                            | 154<br>17.6 (15.0-20.5) | 31<br>13.9 (9.6-19.8)   | 1.40 (0.89-2.20)                    | 2.54 (1.56-4.12)                 | 10<br>1.2 (0.4-3.0) | 4<br>0.5 (0.1-2.2)  | 0.32 (0.12-0.85)                    | 0.46 (0.17-1.24)                 |
| 45-54                            | 106<br>15.9 (13.0-19.3) | 39<br>13.6 (9.9-18.3)   | 1.24 (0.78-1.97)                    | 2.43 (1.46-4.03)                 | 5<br>0.4 (0.1-1.7)  | 2<br>0.7 (0.2-2.9)  | 0.22 (0.07-0.66)                    | 0.34 (0.11-1.09)                 |
| 55-64                            | 73<br>17.6 (14.0-21.9)  | 40<br>15.4 (11.3-20.7)  | 1.40 (0.89-2.21)                    | 2.78 (1.67-4.62)                 | 2<br>0.8 (0.4-1.6)  | 2<br>0.7 (0.2-1.9)  | 0.12 (0.04-0.42)                    | 0.18 (0.05-0.63)                 |
| <b>Relationship status</b>       |                         |                         |                                     |                                  |                     |                     |                                     |                                  |
| Married                          | 165<br>9.7 (8.3-11.3)   | 58<br>9.0 (6.9-11.7)    | 1.00                                | 1.00                             | 13<br>3.4 (2.0-5.7) | 5<br>0.4 (0.05-2.8) | 1.00                                | 1.00                             |
| Cohabiting                       | 155<br>25.6 (22.1-29.5) | 38<br>18.1 (12.8-25.0)  | 2.94 (2.33-3.71)                    | 3.52 (2.72-4.58)                 | 15<br>4.1 (2.0-7.9) | 1<br>2.7 (0.8-8.6)  | 3.30 (1.55-7.02)                    | 2.01 (0.85-4.73)                 |
| Divorced/separated/<br>broken up | 131<br>34.3 (28.9-40.1) | 34<br>25.7 (18.7-34.2)  | 4.50 (3.48-5.82)                    | 4.42 (3.39-5.76)                 | 10<br>4.1 (2.0-7.9) | 3<br>2.7 (0.8-8.6)  | 4.82 (2.11-11.0)                    | 3.89 (1.71-8.85)                 |
| Widowed                          | 13<br>19.7 (11.7-31.2)  | 3<br>8.8 (2.8-24.8)     | 1.81 (1.02-3.20)                    | 1.58 (0.88-2.82)                 | 0                   | 1<br>2.9 (0.4-18.5) | 1.27 (0.16-9.90)                    | 1.55 (0.20-12.19)                |
| <b>Education attainment</b>      |                         |                         |                                     |                                  |                     |                     |                                     |                                  |
| Primary and secondary            | 291<br>19.2 (17.2-21.5) | 54<br>14.8 (11.0-19.6)  | 1.00                                | 1.00                             | 25<br>2.0 (1.3-3.2) | 6<br>1.7 (0.7-4.0)  | 1.00                                | 1.00                             |
| Tertiary level                   | 172<br>14.1 (12.2-16.3) | 78<br>12.1 (9.7-15.1)   | 0.69 (0.57-0.83)                    | 0.77 (0.64-0.94)                 | 13<br>1.6 (0.9-2.8) | 3<br>0.4 (0.1-1.2)  | 0.58 (0.300-1.12)                   | 0.77 (0.36-1.62)                 |
| <b>Independent income</b>        |                         |                         |                                     |                                  |                     |                     |                                     |                                  |
| Yes                              | 388<br>17.7 (16.0-19.5) | 98<br>13.2 (10.9-16.0)  | 1.25 (0.98-1.60)                    | 1.05 (0.81-1.35)                 | 28<br>1.7 (1.1-2.5) | 7<br>0.9 (0.4-2.2)  | 0.79 (0.39-1.59)                    | 0.76 (0.34-1.69)                 |

|                               |                         |                        |                  |                  |                     |                     |                   |                  |
|-------------------------------|-------------------------|------------------------|------------------|------------------|---------------------|---------------------|-------------------|------------------|
| No                            | 76<br>14.1 (11.2-17.7)  | 35<br>12.6 (9.0-17.6)  | 1.00             | 1.00             | 10<br>2.4 (1.2-4.5) | 3<br>0.9 (0.3-2.9)  | 1.00              | 1.00             |
| <b>Area-deprivation level</b> |                         |                        |                  |                  |                     |                     |                   |                  |
| Least deprived                | 123<br>13.2 (11.0-15.7) | 32<br>11.8 (8.2-16.7)  | 1.00             | 1.00             | 4<br>0.6 (0.2-1.6)  | 2<br>0.9 (0.2-4.0)  | 1.00              | 1.00             |
| Moderately deprived           | 181<br>16.9 (14.6-19.4) | 48<br>12.0 (9.1-15.7)  | 1.24 (0.98-1.57) | 1.12 (0.88-1.44) | 16<br>2.1 (1.2-3.5) | 2<br>0.4 (0.06-3.0) | 2.46 (0.92-6.59)  | 2.16 (0.79-5.94) |
| Mostly deprived               | 160<br>21.8 (18.5-25.5) | 53<br>15.3 (11.6-19.9) | 1.66 (1.29-2.15) | 1.36 (1.03-1.78) | 18<br>3.1 (1.8-5.1) | 6<br>1.5 (0.7-3.4)  | 3.95 (1.52-10.25) | 2.78 (1.04-7.40) |

\* Weighted % and 95% CIs are presented.

\* AORs (Weighted Adjusted Odds Ratios) are adjusted for age, education, relationship status, area-deprivation level, independent income, and the year of the study.

For peer review only

## ***Sexual IPV***

### *Changes in sexual IPV prevalence rates*

*Lifetime prevalence.* A significant decrease in the reported lifetime prevalence of sexual IPV was found in univariate analysis, from 16.9% in 2003 to 13.1% in 2019 (OR= 0.74; 95%CI=0.59-0.92). After controlling for sociodemographic variables, the significant decrease in the reported experience of lifetime sexual IPV remained unchanged (AOR=0.74; 95%CI=0.59-0.95).

*12-month prevalence.* No significant differences in the 12-month prevalence rates of sexual IPV between two study years was found in univariate analysis (approximately 1% in both study years) (OR=0.50, 95%CI=0.23-1.10). After controlling for sociodemographic factors, the nonsignificant difference in 12-month sexual IPV between two study years remained unchanged (AOR=0.50; 95%CI=0.19-1.35).

### *Characteristics of women reporting lifetime and past-12 months sexual IPV*

*Lifetime sexual IPV.* At the multivariate level, age, relationship status, education attainment, and area-deprivation level were significantly associated with lifetime sexual IPV. Women were more likely to report having experienced lifetime sexual IPV if they were: aged 25 and over; cohabiting, divorced or separated, or widowed; or living in the most deprived areas. Those who had some tertiary education were less likely to report lifetime experience of sexual IPV compared with those with primary or secondary education (Table 3).

*Past 12-month sexual IPV.* Those who were divorced/separated were more likely to report having experienced 12-month sexual IPV compared to married women. Those living in the most deprived areas were also more likely to report 12-month sexual IPV. Women aged 55 years and above were less likely to report having experienced sexual IPV in the past 12 months compared with younger women (Table 3).

No significant interaction was found between study year and socio-demographic factors (data not shown).

### *Changes in women's attitudes*

In 2003, 48.1% agreed with at least one of the statements indicating agreement with traditional gender roles, compared with 38.4% in 2019. While not common in 2003, it was even less

1  
2  
3  
4  
5  
6  
7  
8  
9  
10  
11  
12  
13  
14  
15  
16  
17  
18  
19  
20  
21  
22  
23  
24  
25  
26  
27  
28  
29  
30  
31  
32  
33  
34  
35  
36  
37  
38  
39  
40  
41  
42  
43  
44  
45  
46  
47  
48  
49  
50  
51  
52  
53  
54  
55  
56  
57  
58  
59  
60

common in 2019 for women to agree with the justifications for a man to hit his wife if he finds out she has been unfaithful (3.8% agreement in 2003, 1.8% agreement in 2019) (Table 4).

For peer review only

Table 4. Prevalence rates and changes in women's attitudes toward traditional gender roles in relationships and attitudes towards acceptability of a man hitting his wife.

| Attitude item                                                                               | Freq<br>% (95% CI)*       |                         | Odds ratio<br>(95%CI)* | P value |
|---------------------------------------------------------------------------------------------|---------------------------|-------------------------|------------------------|---------|
|                                                                                             | 2003 (n=2674)             | 2019 (n=944)            |                        |         |
| <b>Roles of women and men in relationships</b>                                              |                           |                         |                        |         |
| A good wife obeys her husband even if she disagrees                                         | 371<br>13.6 (12.0-15.4)   | 108<br>14.7 (10.8-19.8) | 1.10 (0.75-1.61)       | 0.6     |
| Family problems should only be discussed with people in the family                          | 1076<br>39.5 (37.2-41.9)  | 274<br>27.6 (24.0-31.4) | 0.58 (0.47-0.72)       | 0.001   |
| It is important for a man to show his partner who is boss                                   | 201<br>7.4 (6.2-8.7)      | 32<br>3.1 (2.1-4.7)     | 0.40 (0.25-0.64)       | 0.001   |
| A woman should be able to choose her own friends even if her husband disapproves (disagree) | 169<br>6.0 (5.1-7.2)      | 66<br>7.3 (5.5-9.6)     | 1.23 (0.87-1.74)       | 0.2     |
| It's a wife obligation to have sex with her husband even if she doesn't feel like           | 216<br>8.1 (6.9-9.4)      | 56<br>5.8 (4.1-8.0)     | 0.70 (0.47-1.03)       | 0.07    |
| At least agreed with one statement                                                          | 1337<br>48.1 (45.7-50.5)  | 365<br>38.4 (33.8-43.2) | 0.67 (0.54-0.83)       | 0.001   |
| <b>Acceptability of a man hitting his wife</b>                                              |                           |                         |                        |         |
| She doesn't complete her household work to his satisfaction                                 | 9<br>0.3 (0.1-0.6)        | 5<br>0.4 (0.1-1.2)      | 1.47 (0.40-5.36)       | 0.5     |
| She disobeys him                                                                            | 18<br>0.5 (0.3-0.9)       | 8<br>0.7 (0.3-1.5)      | 1.32 (0.52-3.34)       | 0.5     |
| She refuses to have sex with him                                                            | 9<br>0.2 (0.1-0.5)        | 5<br>0.5 (0.2-1.3)      | 1.99 (0.60-6.62)       | 0.2     |
| She asks him whether he has other girlfriends                                               | 18<br>0.5 (0.3-1.0)       | 3<br>0.2 (0.04-0.7)     | 0.31 (0.07-1.39)       | 0.1     |
| He suspects that she is unfaithful                                                          | 36<br>1.3 (0.9-1.9)       | 8<br>0.7 (0.3-1.5)      | 0.52 (0.22-1.25)       | 0.1     |
| He finds out she has been unfaithful                                                        | 107<br>3.8 (3.0-4.8)      | 17<br>1.8 (1.0-3.3)     | 0.46 (0.24-0.90)       | 0.02    |
| At least one                                                                                | 107/2748<br>3.5 (2.8-4.5) | 22<br>2.3 (1.4-3.8)     | 0.64 (0.35-0.1.14)     | 0.1     |

\*Weighted % and odds ratios with 95% CIs are presented

### *Changes in help seeking behaviors*

There was an overall reduction in the proportion of women who had sought help from formal or informal sources, with three-quarters (77%) of women who had experienced IPV reporting that they had told someone about the violence in 2003 compared with 70% in 2019. This reduction appears to be driven by the significant reduction in the proportion of women who sought help from informal sources (from 71.3% in 2003 to 64.6% in 2019). There was no change in the proportion of women who sought help from ‘formal’ sources between the two study years. Similarly, there was no significant change in the proportion of women who reported that they received help from formal sources (Table 5).

Table 5. Prevalence rates and changes in help sought and received help between 2003 and 2019 by those who reported at least one type of sexual or physical IPV.

| Source of help                                     |                                                    | <i>Help sought (Who you told about IPV)</i> |                         |                  |         | <i>Who helped you with IPV</i> |                         |                  |         |
|----------------------------------------------------|----------------------------------------------------|---------------------------------------------|-------------------------|------------------|---------|--------------------------------|-------------------------|------------------|---------|
|                                                    |                                                    | 2003 (n=957)                                | 2019 (n=322)            | Odds ratio       | P value | 2003 (n=957)                   | 2019 (n=322)            | Odds ratio       | P value |
| No one                                             |                                                    | 223<br>23.3(20.6- 26.3)                     | 89<br>30.0 (24.8-35.9)  | 1.41 (1.04-1.92) | 0.027   | 397<br>40.6 (37.5-43.9)        | 125<br>39.9 (34.5-45.6) | 0.97 (0.74-1.27) | 0.8     |
| Informal sources                                   |                                                    | 679<br>71.3 (68.1-74.2)                     | 216<br>64.6 (58.7-70.1) | 0.74 (0.55-0.98) | 0.037   | 489<br>52.0 (48.8-55.3)        | 171<br>52.1 (46.4-57.7) | 1.00 (0.77-1.30) | 0.9     |
| Formal sources                                     | police/lawyer/court                                | 132<br>13.6 (11.4-16.2)                     | 49<br>13.8 (10.4-18.2)  | 1.02 (0.69-1.49) | 0.9     | 89<br>9.1 (7.4-11.2)           | 31<br>8.8 (6.1-12.5)    | 0.96 (0.61-1.50) | 0.8     |
|                                                    | Women's<br>refugee/NGO/women<br>organization/Marae | 44<br>4.5 (3.2-6.3)                         | 24<br>6.9 (4.3-11.0)    | 1.57 (0.84-2.91) | 0.15    | 43<br>4.3 (3.1-5.9)            | 19<br>5.3 (3.1-8.9)     | 1.24 (0.64-2.37) | 0.5     |
|                                                    | Health workers                                     | 125<br>12.9 (10.8-15.4)                     | 40<br>11.2 (8.2-15.1)   | 0.85 (0.57-1.26) | 0.4     | 71<br>7.7 (5.9-9.9)            | 26<br>8.0 (5.4-11.6)    | 1.04 (0.63-1.71) | 0.8     |
|                                                    | Counsellor                                         | 168<br>16.7 (14.4-19.2)                     | 45<br>12.2 (8.9-16.6)   | 0.69 (0.47-1.03) | 0.07    | 103<br>10.4 (7.4-14.3)         | 37<br>10.4 (7.4-14.3)   | 0.98 (0.64-1.49) | 0.9     |
|                                                    | At least one                                       | 294<br>30.3 (27.3-33.4)                     | 93<br>25.8 (21.1-31.1)  | 0.80 (0.59-1.08) | 0.1     | 203<br>21.1 (18.5-24.0)        | 67<br>19.4 (15.2-24.4)  | 0.90 (0.64-1.25) | 0.5     |
| Religious leader (priest in<br>2003)/church member |                                                    | 31<br>3.2 (2.2-4.8)                         | 4<br>1.1 (0.4-2.8)      | 0.32 (0.11-0.93) | 0.037   | 16<br>1.8 (1.0-3.1)            | 5<br>1.3 (0.5-3.2)      | 0.73 (0.26-2.08) | 0.5     |



## Discussion

Changes in prevalence of physical and sexual IPV between 2003 and 2019 were explored using two population-based surveys. Our findings indicated that the lifetime prevalence of physical IPV remained relatively unchanged between 2003 and 2019, with almost one third (30%) of women in both surveys reporting having experienced at least one act of physical IPV in their lifetime. This is similar to reported prevalence rates from the EU 28-countries study (33%),<sup>28</sup> and the USA (30.6%),<sup>29</sup> and is comparable to the global average.<sup>30</sup> While lifetime prevalence of physical IPV was unchanged, there was a significant decrease in the proportion of women who reported experiencing 12-month physical IPV. Small reductions in rates for lifetime sexual IPV were also observed. Population changes in sociodemographic characteristics did not fully explain the decreases in IPV prevalence over time, and the noted changes were consistent across sub-groups of the population.

In 2003, 48.1% of women agreed one or more of the statements supportive of traditional gender roles, compared with 38.4% in 2019. These were low percentages of agreement compared with women in low- and middle- income countries.<sup>31-33</sup> Agreement with attitudes supportive of justifications for a man hitting his wife was low in both the 2003 (0.2%-3.8%) and 2019 surveys (0.2%-2.3%), and extremely low compared with results reported from low-and middle-income countries.<sup>34, 35</sup> but comparable with high income countries.<sup>36</sup> Even with this low rate of agreement, change was still observed, with a significant reduction in agreement with the statement that “it is acceptable for a man to hit his wife if he found out she was unfaithful”, from 3.8% in 2003 to 1.8% in 2019.

Overall, among women who experienced IPV, the rates of disclosure (telling someone about the violence) were high (77% in 2003, 70% in 2019), compared with findings from low- and middle income countries,<sup>37, 38</sup> and comparable with high income countries.<sup>39</sup> It should be noted, however, that most disclosures were made to informal sources, such as family or friends. There was no change in “help received” from formal sources (21.1% in 2003, 19.4% in 2019). This warrants further attention, to determine if this is due to limited service capacity, or limits in the quality of help currently available.

Possible explanations for the study findings include: actual changes in perpetrator behavior over time; or changes due to differences in methods, measurement or samples.

1  
2  
3 There is some evidence that changes in perpetrator behavior may have occurred, as the  
4 reduction in the 12-month prevalence of physical and lifetime sexual IPV between 2003 and  
5 2019 is consistent with a reduction in 12-month prevalence of psychological IPV noted in the  
6 same sample (Fanslow et al, BMJ Open, under revision).<sup>40</sup> Changes in perpetrator behaviour  
7 are possible, as there have been a series of strategies and campaigns implemented between the  
8 two study years. These included: changes in legislation (e.g. amendments to family violence  
9 law), and the introduction of prevention campaigns and programmes (e.g. the Family Violence:  
10 It's not ok national campaign,<sup>41</sup> and Accident Compensation Corporation-funded Mates and  
11 Dates high schools programmes on healthy relationships<sup>42</sup>). These actions may have  
12 contributed to changes in societal awareness and understandings of attitudes supportive of  
13 violence against women as there is some evidence that these initiatives had wide population  
14 reach.<sup>40</sup> This interpretation is supported by our findings on the reduction in women's  
15 agreement with attitudes toward traditional gender roles and reduction in women's agreement  
16 with the acceptability of a man hitting his wife if she was unfaithful. Other studies have also  
17 noted the relationship between attitudes to violence and victimization.<sup>43, 44</sup>

18  
19 An additional feature of these societal actions was the call for those experiencing violence to  
20 reach out for help.<sup>41</sup> Our findings suggest that there has been no change in women contacting  
21 formal sources of help, and a small but significant reduction in talking with informal sources.  
22 As help-seeking can be related to the severity of violence experienced, it is possible that the  
23 lack of change in accessing formal help among women is related to the reduction of current  
24 physical, and lifetime sexual IPV between the studied years and a possible decrease of high  
25 severity cases. However, it is also possible that activities designed to encourage community  
26 engagement in violence prevention may need additional resourcing to ensure a sustained  
27 response and appropriate access to necessary services. Further research with larger sample  
28 sizes will be important to verify this finding.

29  
30 The alternate explanation of the observed changes being due to differences in study methods  
31 or sample difference seem less likely. Specifically, the comparability of methods across the  
32 two surveys, including use of identical questions in the two survey waves, lends strength to  
33 the interpretation that the prevalence changes noted are real. Additionally, while there were  
34 some differences in the characteristics of the two samples, the adjusted odds ratio showed  
35 that after controlling for all socio-demographic factors, the observed differences in  
36 prevalence still remained significant.

1  
2  
3 The observed reduction in 12-month prevalence of physical IPV is positive, and parallels  
4 overall reductions in crime rates reported by crime and victimisation surveys,<sup>45</sup> and is similar  
5 to reductions in prevalence of IPV documented in Australia between 1996 and 2005.<sup>46</sup> It may  
6 be the result of more women recognising abusive behaviour and taking their own actions to  
7 leave abusive relationships. However, further efforts and investment are needed to ensure that  
8 those who ask for help actually receive help. Importantly, the stability of the lifetime  
9 prevalence of physical IPV should heighten efforts to develop and implement comprehensive  
10 and sustained prevention work with those who use violence in relationships.  
11  
12  
13  
14  
15  
16  
17

### 18 ***Strengths***

19 Strengths include: the representativeness of the samples obtained, and the use of comparable  
20 methods and comparable questions across the two survey waves. Additionally, the 15 year time  
21 gap between the two survey waves is sufficient to determine if real change occurred.<sup>12</sup>  
22  
23  
24  
25  
26

### 27 ***Limitations and recommendations for future studies***

28 Changes between two time points are not sufficient to determine if the change represents a  
29 trend, so caution is needed when interpreting the changes observed. Overall, the prevalence  
30 estimate obtained may under-report what is happening in the population as a whole, either  
31 because of stigma,<sup>47</sup> or because of the overall response rate for the study. While we  
32 successfully surveyed over 63% of eligible women, those with greater levels of exposure to  
33 violence may be less likely to have participated. Future studies would benefit from larger  
34 sample sizes, which would improve the chance of detecting real changes in low base rate  
35 phenomena, such as 12-month prevalence of sexual IPV.  
36  
37  
38  
39  
40  
41  
42  
43

### 44 ***Conclusion***

45 The observed reduction in 12-month physical and lifetime sexual IPV prevalence rates, changes  
46 in attitudes about the acceptability of violence, and the increases in help seeking are positive.  
47 However, work is still needed to address the substantial problem of IPV, as the lifetime  
48 prevalence rate of 1 in 3 women experiencing IPV remained stable over the 15-year time  
49 interval. This means that prevention efforts must be increased and sustained, and that adequate  
50 structures and resources must be available to respond to those seeking help.  
51  
52  
53  
54  
55  
56  
57  
58  
59

### 60 **Acknowledgements**

1  
2  
3 We gratefully acknowledge participants, the interviewers, and the study project team, led by  
4 Patricia Meagher-Lundberg. We also acknowledge the representatives from the Ministry of  
5 Justice, the Accident Compensation Corporation, the New Zealand Police, and the Ministry of  
6 Education, who were part of the Governance Group for Family and Sexual Violence at the  
7 inception of the study. The two cross-sectional studies from which this study used data are  
8 based on the WHO Violence Against Women Instrument as developed for use in the WHO  
9 Multi-Country Study on Women's Health and Domestic Violence and has been adapted from  
10 the version used in Asia and the Pacific by kNOwVAWdata (Version 12.03).  
11  
12  
13  
14  
15  
16  
17  
18

19 **Contributors:** Janet Fanslow (JF), Pauline Gulliver (PG), contributed to the conception and  
20 design of the study. Tracey McIntosh (TM) contributed to the application for funding of 2019  
21 study. Ladan Hashemi (LH) managed the data cleaning, and conducted the analyses, with  
22 contributions from Zarintaj Malihi (ZM). LH, JF and PG interpreted the data, drafted the  
23 article and revised it. All authors contributed to the manuscript and approved the final  
24 version.  
25  
26

27 **Competing interests** hereby we confirm that all authors read and understood BMJ policy on  
28 declaration of interests and have completed the ICMJE uniform disclosure form at  
29 [http://www.icmje.org/coi\\_disclosure.pdf](http://www.icmje.org/coi_disclosure.pdf) and declare that we have no financial relationships  
30 with any organisations that might have an interest in the submitted work in the previous three  
31 years. The authors declare that no competing interests exist. The funders had no role in study  
32 design, data collection and analysis, decision to publish, or preparation of the manuscript.  
33  
34

35 **Funding statement.** This work was supported by the Health Research Council of New  
36 Zealand (Grant 02/207) for the 2003 study and the New Zealand Ministry of Business,  
37 Innovation and Employment, Contract number CONT-42799-HASTR-UOA for the 2019  
38 study.  
39  
40

41 **Ethics approval** was granted by the University of Auckland Human Participants Ethics  
42 Committee in 2003 (Ref number: 2002/199) and 2019 (Reference number 2015/ 018244).  
43

44 **Data availability statement.** Data are unavailable due to the confidentiality and sensitivity  
45 of the data and Māori data sovereignty.  
46  
47  
48  
49  
50

## 51 **References**

- 52 1. United Nations, *Secretary-General's in-depth study on all forms of violence against women*, in  
53 *Report of the Secretary-General*. 2006: U.N. document A/61/122/Add.1.
- 54 2. Kangaspunta, K. and I.H. Marshall, *Trends in Violence against Women: Some Good News and*  
55 *Some Bad News*, in *The International Crime Drop*, A.T. Jan van Dijk, Graham Farrell, Editor.  
56 2012, Palgrave Macmillan: London. p. 103-155.  
57  
58  
59  
60

3. Gulliver, P. and J. Fanslow, *Measurement of family violence at a population level: : What might be needed to develop reliable and valid family violence indicators?* 2012, New Zealand Family Violence Clearinghouse: New Zealand.
4. Powers, R.A. and C.E. Kaukinen, *Trends in Intimate Partner Violence: 1980-2008*. Journal of Interpersonal Violence, 2012. **27**(15): p. 3072-3090.
5. Orr, C., D. Preen, C. Fisher, S. Sims, and M. O'Donnell, *Trends in Hospital Admissions for Intimate Partner Violence in Australian Mothers With Children Born From 1990 to 2009*. Journal of Interpersonal Violence, 2019: p. 0886260519832905.
6. United\_Nations, *The World's Women 2010: Trends and Statistics*, in *UN Stats*. 2010.
7. Tjaden, P. and N. Thoennes, *Prevalence, Incidence, and Consequences of Violence Against Women: Findings From the National Violence Against Women Survey*. 1998, U.S. Department of Justice, Office of Justice Programs, National Institute of Justice: Washington, U.S.A.
8. Canada, S., *The violence against women survey. Highlights*, in *Dly Stat Can*. 1993: Canada. p. 1-9.
9. Mouzos, J. and T. Makkai, *Women's Experiences of Male Violence: Findings from the Australian Component of the International Violence Against Women Survey (IVAWS)*, R.a.P.P. Series, Editor. 2004, Australian Institute of Criminology: Australia. p. 162.
10. FRA, *Violence against women: an EU-wide survey*. 2014, European Union Agency for Fundamental Rights: Luxembourg: Publications Office of the European Union.
11. Heiskanen, M. and M. Piispa, *Faith, Hope, Battering: A Survey of Men's Violence Against Women in Finland*. 1998, Helsinki: Yliopistopaino
12. Heiskanen, M. and M. Piispa. *Violence against Women in Finland. Results from Two National Victimization Surveys*. in *VICTIMISATION SURVEYS IN COMPARATIVE PERSPECTIVE 2007*. Stockholm: European Institute for Crime Prevention and Control, affiliated with the United Nations (HEUNI) P.O.Box 444 FIN-00531 Helsinki Finland.
13. Sanz-Barbero, B., N. Barón, and C. Vives-Cases, *Prevalence, associated factors and health impact of intimate partner violence against women in different life stages*. PLoS ONE, 2019. **14**: p. e0221049.
14. Fanslow, J.L. and E.M. Robinson, *Violence against women in New Zealand: Prevalence and health consequences*. New Zealand Medical Journal 2004. **117**(1206).
15. Dahlberg, L.L. and E.G. Krug. *Violence a global public health problem 2006* [cited 11; 277-292]. Available from: [http://www.scielo.br/scielo.php?script=sci\\_arttext&pid=S1413-81232006000200007&nrm=iso](http://www.scielo.br/scielo.php?script=sci_arttext&pid=S1413-81232006000200007&nrm=iso).
16. Heise, L.L., *Violence Against Women:An Integrated, Ecological Framework*. 1998. **4**(3): p. 262-290.
17. Kim, J.Y., S. Oh, and S.I. Nam, *Prevalence and Trends in Domestic Violence in South Korea: Findings From National Surveys*. Journal of Interpersonal Violence, 2015. **31**(8): p. 1554-1576.
18. Dawson, M., V.P. Bunge, and T. Balde, *National Trends in Intimate Partner Homicides: Explaining Declines in Canada, 1976 to 2001*. Violence Against Women, 2009. **15**(3): p. 276-306.
19. Hindin, M.J., *Understanding women's attitudes towards wife beating in Zimbabwe / Michelle J. Hindin*. Bulletin of the World Health Organization : the International Journal of Public Health 2003 ; **81**(7) : 501-508, 2003.
20. Koenig, M.A., R. Stephenson, S. Ahmed, S.J. Jejeebhoy, and J. Campbell, *Individual and contextual determinants of domestic violence in North India*. American journal of public health, 2006. **96**(1): p. 132-138.
21. World Health, O., *Changing cultural and social norms that support violence*. 2009, World Health Organization: Geneva.
22. Donovan, R.J., D. Paterson, and M. Francas, *Targeting male perpetrators of intimate partner violence: Western Australia's "Freedom from Fear" campaign*. Soc Mar Q, 1999. **5**(3): p. 128-44.

23. Usdin, S., E. Scheepers, S. Goldstein, and G. Japhet, *Achieving social change on gender-based violence: a report on the impact evaluation of Soul City's fourth series*. Soc Sci Med, 2005. **61**(11): p. 2434-45.
24. Fanslow, J., P. Gulliver, L. Hashemi, Z. Malihi, and T. McIntosh, *Methods for the 2019 New Zealand family violence study- a study on the association between violence exposure, health and well-being*. Kōtuitui: New Zealand Journal of Social Sciences Online, 2021: p. 1-14.
25. WHO, *Putting women first: ethical and safety recommendations for research on domestic violence against women*. 2001, Department of Gender and Women's Health, Family and Community Health, World Health Organization: Geneva, Switzerland.
26. Core Technical Team, W.M.-c.S.o.V.A.W., *WHO MultiCountry Study on Violence Against Women, Questionnaire, Version 10*. 2003, WHO: Gender and Health Department.
27. StataCorp, *Stata Statistical Software: Release 15*. College Station, TX: StataCorp LLC. 2017.
28. Goodey, J., *Violence Against Women: Placing Evidence From a European Union–Wide Survey in a Policy Context*. Journal of Interpersonal Violence, 2017. **32**(12): p. 1760-1791.
29. Smith, S.G., Zhang, X., Basile, K.C., Merrick, M.T., Wang, J., Kresnow, M., Chen, J. , *National Intimate Partner and Sexual Violence Survey: 2015 Data Brief – Updated Release*. 2018, National Center for Injury Prevention and Control, Centers for Disease Control and Prevention: Atlanta, Georgia.
30. WHO, *Global and regional estimates of violence against women: prevalence and health effects of intimate partner violence and non-partner sexual violence*. 2013, World Health Organization: Italy.
31. Jayatilleke, A., K.C. Poudel, K. Sakisaka, J. Yasuoka, A.U. Jayatilleke, and M. Jimba, *Wives' Attitudes Toward Gender Roles and Their Experience of Intimate Partner Violence by Husbands in Central Province, Sri Lanka*. 2011. **26**(3): p. 414-432.
32. Hayati, E.N., U. Hogberg, M. Hakimi, M.C. Ellsberg, and M. Emmelin, *Behind the silence of harmony: risk factors for physical and sexual violence among women in rural Indonesia*. BMC Women's Health, 2011. **11**: p. 52.
33. Black, E., H. Worth, S. Clarke, J.H. Obol, P. Akeru, A. Awor, M.S. Shabiti, H. Fry, and R. Richmond, *Prevalence and correlates of intimate partner violence against women in conflict affected northern Uganda: a cross-sectional study*. Conflict and Health, 2019. **13**(1): p. 35.
34. Khan, M.N. and M.M. Islam, *Women's attitude towards wife-beating and its relationship with reproductive healthcare seeking behavior: A countrywide population survey in Bangladesh*. PloS one, 2018. **13**(6): p. e0198833-e0198833.
35. Hindin, M.J., *Understanding women's attitudes towards wife beating in Zimbabwe*. Bull World Health Organ, 2003. **81**(7): p. 501-8.
36. VicHealth, *Australians' attitudes to violence against women*. 2014, Victorian Health Promotion Foundation: Australia.
37. Leonardsson, M. and M. San Sebastian, *Prevalence and predictors of help-seeking for women exposed to spousal violence in India – a cross-sectional study*. BMC Women's Health, 2017. **17**(1): p. 99.
38. Linos, N., N. Slopen, L. Berkman, S.V. Subramanian, and I. Kawachi, *Predictors of help-seeking behaviour among women exposed to violence in Nigeria: a multilevel analysis to evaluate the impact of contextual and individual factors*. J Epidemiol Community Health, 2014. **68**(3): p. 211-7.
39. Ansara, D.L. and M.J. Hindin, *Formal and informal help-seeking associated with women's and men's experiences of intimate partner violence in Canada*. Social Science & Medicine, 2010. **70**(7): p. 1011-1018.
40. Fanslow, J.L., Z. Malihi, L. Hashemi, P. Guliver, and T. McIntosh, *Change in prevalence of psychological and economic abuse, and controlling behaviours against women by an intimate partner in two cross-sectional studies in New Zealand, 2003-2019*. BMJ Open, Under revision.

- 1  
2  
3 41. Roguski, M., *'It's not OK' Campaign Community Evaluation Project 2015*, New Zealand Ministry  
4 of Social Development: New Zealand.  
5 42. Duncan, A. and V. Kingi, *Evaluation of ACC's Mates and Dates : : school-based healthy*  
6 *relationships primary prevention programme pilot*. 2015, Wellington, New Zealand::  
7 Lighthouse Consulting New Zealand.  
8 43. Khawaja, M., N. Linos, and Z. El-Roueiheb, *Attitudes of Men and Women Towards Wife*  
9 *Beating: Findings From Palestinian Refugee Camps in Jordan*. *Journal of Family Violence*, 2008.  
10 **23**(3): p. 211-218.  
11 44. Nayak, M.B., C.A. Byrne, M.K. Martin, and A.G. Abraham, *Attitudes Toward Violence Against*  
12 *Women: A Cross-Nation Study*. *Sex Roles*, 2003. **49**(7): p. 333-342.  
13 45. Mayhew, P., *The Case of Australia and New Zealand*. , in *The International Crime Drop -2012*  
14 *New Directions in Research*, J.v.D.A.T.G. Farrell, Editor. 2012, Palgrave Macmillan, a division of  
15 Macmillan Publishers Limited 2012. p. 76-102.  
16 46. ABS, *Personal Safety, Australia, Changes in prevalence of partner violence over time*. 2012.  
17 47. Gracia, E., *Unreported cases of domestic violence against women: towards an epidemiology of*  
18 *social silence, tolerance, and inhibition*. *Journal of epidemiology and community health*, 2004.  
19 **58**(7): p. 536-537.  
20  
21  
22  
23  
24  
25  
26  
27  
28  
29  
30  
31  
32  
33  
34  
35  
36  
37  
38  
39  
40  
41  
42  
43  
44  
45  
46  
47  
48  
49  
50  
51  
52  
53  
54  
55  
56  
57  
58  
59  
60

1  
2  
3 Figure legend:

4 Figure 1 Flow diagram of female participants in the 2003 and 2019 population-based studies  
5 on family violence in New Zealand  
6  
7  
8  
9  
10  
11  
12  
13  
14  
15  
16  
17  
18  
19  
20  
21  
22  
23  
24  
25  
26  
27  
28  
29  
30  
31  
32  
33  
34  
35  
36  
37  
38  
39  
40  
41  
42  
43  
44  
45  
46  
47  
48  
49  
50  
51  
52  
53  
54  
55  
56  
57  
58  
59  
60

For peer review only



1  
2  
3  
4  
5  
6  
7  
8  
9  
10  
11  
12  
13  
14  
15  
16  
17  
18  
19  
20  
21  
22  
23  
24  
25  
26  
27  
28  
29  
30  
31  
32  
33  
34  
35  
36  
37  
38  
39  
40  
41  
42  
43  
44  
45  
46

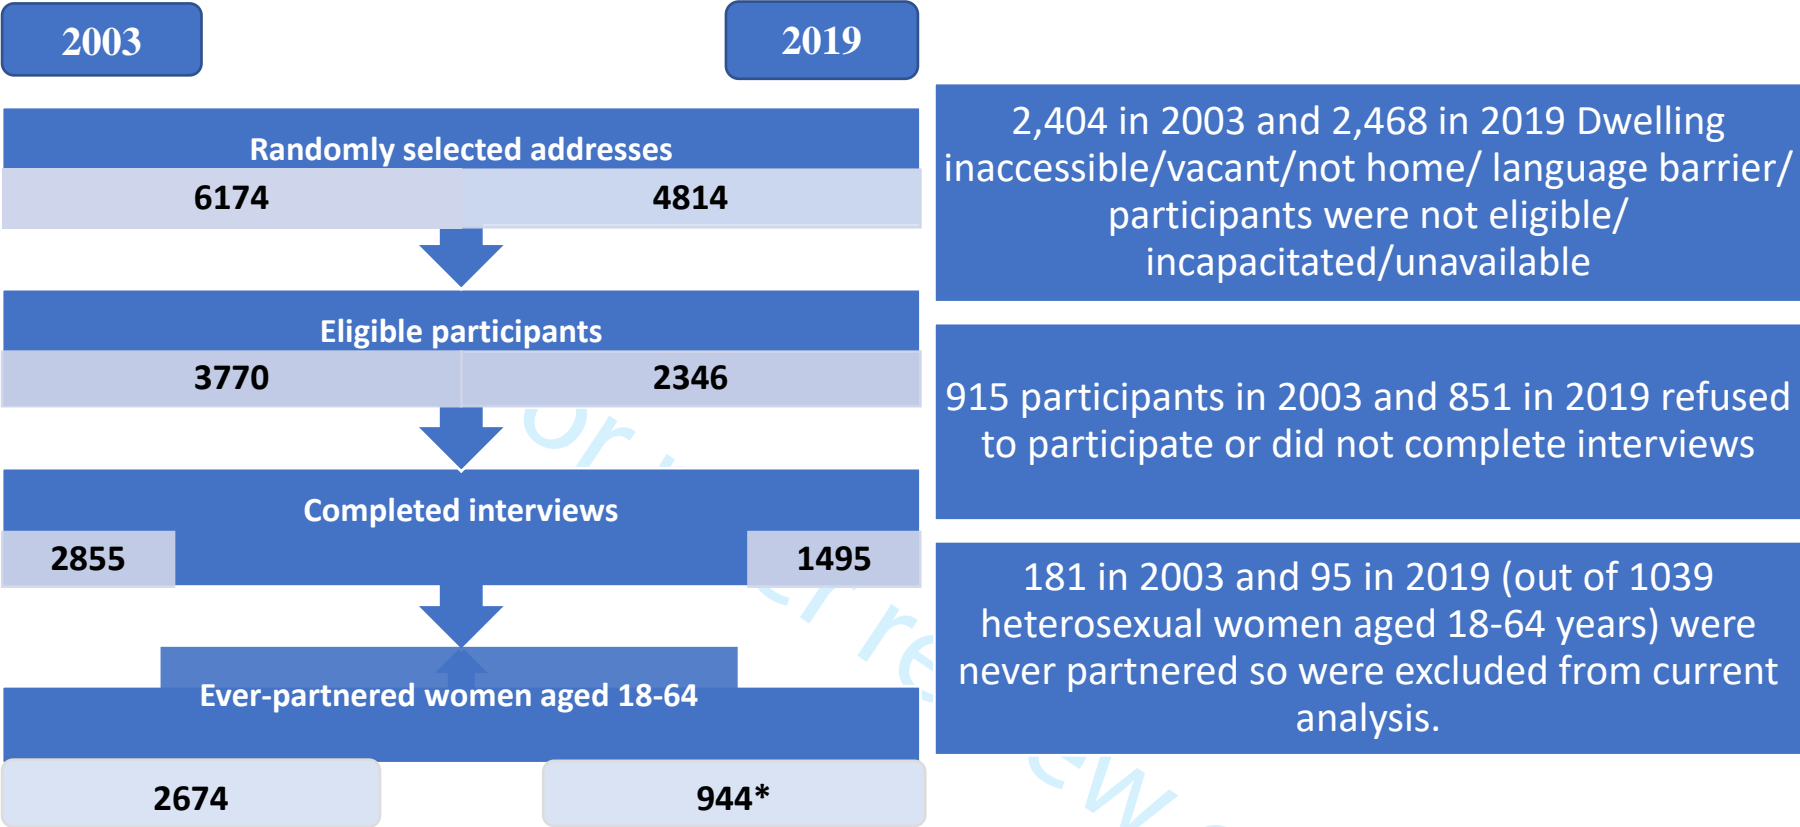

\*For the purpose of this paper, we only included women aged 18-64 years from the 2019 survey.

Supplementary Table 1. Definition of lifetime and past 12-month physical and sexual IPV, sociodemographic factors, attitude toward violence against women and gender roles, and help seeking behaviours in the 2003 and 2019 surveys

| Variable                                       | Definition                                                                                                                                                                                                                                                                                                                                                                                                                              |
|------------------------------------------------|-----------------------------------------------------------------------------------------------------------------------------------------------------------------------------------------------------------------------------------------------------------------------------------------------------------------------------------------------------------------------------------------------------------------------------------------|
| <b>Ever-partnered</b>                          | If they had ever been married, ever lived with, or were currently with a regular sexual partner.                                                                                                                                                                                                                                                                                                                                        |
| <b>Lifetime Physical IPV</b>                   | Participants were categorised as experiencing lifetime physical IPV if they reported having experienced one or more of the following moderate or severe acts of physical violence.<br><br><b>Moderate:</b> Have been slapped or had something thrown at or have been pushed, shoved, or had their hair pulled<br><br><b>Severe:</b> Have been kicked, dragged, beaten up, hit with fist or something else, choked or burnt              |
| <b>12-Month Physical IPV</b>                   | Participants were categorised as experiencing 12-month physical IPV if they reported having experienced one or more acts of the physical IPV in the last 12 months prior to the data collection                                                                                                                                                                                                                                         |
| <b>Sexual IPV</b>                              | Participants were categorised as experiencing lifetime sexual IPV if they reported having experienced one or more of the following acts: being physically forced to have sexual intercourse when the woman did not want to; having sexual intercourse because she was afraid of what her partner might do or being forced to do something sexual that she found degrading or humiliating.                                               |
| <b>12-Month Sexual IPV</b>                     | Participants were categorised as experiencing 12-month sexual IPV if they reported having experienced one or more acts of the sexual IPV in the last 12 months prior to the data collection                                                                                                                                                                                                                                             |
| <b>Independent source of income</b>            | Have access to income from wages or investments, retirement income (yes or no).                                                                                                                                                                                                                                                                                                                                                         |
| <b>Deprivation level</b>                       | Taken from NZ index of multiple deprivation (IMD) <sup>44</sup> which used a combination of routinely collected data from government departments and census data in seven domains (i.e. employment, income, crime, housing, health, education, and access to services) to develop a measure of deprivation at the neighborhood level. Participants were classified in three groups: living in least, moderately and most deprived area. |
| <b>Attitudes toward a man hitting his wife</b> | Participant opinion on six conditions under which hitting or beating one's wife was considered justified : she doesn't complete her household work to his satisfaction; she disobeys him; she refuses to have sex with him; she ask him whether he has other girlfriends; he suspects that she is unfaithful; he finds out that she has been unfaithful. Response options were yes and no.                                              |
| <b>Attitudes toward gender roles</b>           | Participant's attitude about acceptable behaviour for men and women in relationships, and views on family issues being made public: A good wife obeys her husband even if she disagrees; family problems should only be discussed with people in the family; it is important for a man to show his partner who is boss; a woman should be able to choose her own friends even                                                           |

| Variable                     | Definition                                                                                                                                                                                             |
|------------------------------|--------------------------------------------------------------------------------------------------------------------------------------------------------------------------------------------------------|
|                              | if her husband disapproves; it is a wife's obligation to have sex with her husband even if she doesn't feel like it                                                                                    |
| <b>Formal help-seeking</b>   | Contact with service agencies including: police, lawyers, courts, health professionals and mental health workers, or NGOs and community based service providers, including Women's Refuges, and Marae. |
| <b>Informal help seeking</b> | Support from family, friends, neighbours, or workmates.                                                                                                                                                |

For peer review only

**STROBE 2007 (v4) checklist of items to be included in reports of observational studies in epidemiology\***  
**Checklist for cohort, case-control, and cross-sectional studies (combined)**

| Section/Topic             | Item # | Recommendation                                                                                                                                                                                                                                                                                                                                                                                                                                                         | Reported on page #     |
|---------------------------|--------|------------------------------------------------------------------------------------------------------------------------------------------------------------------------------------------------------------------------------------------------------------------------------------------------------------------------------------------------------------------------------------------------------------------------------------------------------------------------|------------------------|
| Title and abstract        | 1      | (a) Indicate the study's design with a commonly used term in the title or the abstract                                                                                                                                                                                                                                                                                                                                                                                 | 1                      |
|                           |        | (b) Provide in the abstract an informative and balanced summary of what was done and what was found                                                                                                                                                                                                                                                                                                                                                                    | 1                      |
| <b>Introduction</b>       |        |                                                                                                                                                                                                                                                                                                                                                                                                                                                                        |                        |
| Background/rationale      | 2      | Explain the scientific background and rationale for the investigation being reported                                                                                                                                                                                                                                                                                                                                                                                   | 2-4                    |
| Objectives                | 3      | State specific objectives, including any pre-specified hypotheses                                                                                                                                                                                                                                                                                                                                                                                                      | 4                      |
| <b>Methods</b>            |        |                                                                                                                                                                                                                                                                                                                                                                                                                                                                        |                        |
| Study design              | 4      | Present key elements of study design early in the paper                                                                                                                                                                                                                                                                                                                                                                                                                | 4                      |
| Setting                   | 5      | Describe the setting, locations, and relevant dates, including periods of recruitment, exposure, follow-up, and data collection                                                                                                                                                                                                                                                                                                                                        | 4-5                    |
| Participants              | 6      | (a) <i>Cohort study</i> —Give the eligibility criteria, and the sources and methods of selection of participants. Describe methods of follow-up<br><i>Case-control study</i> —Give the eligibility criteria, and the sources and methods of case ascertainment and control selection. Give the rationale for the choice of cases and controls<br><i>Cross-sectional study</i> —Give the eligibility criteria, and the sources and methods of selection of participants | 4-5                    |
|                           |        | (b) <i>Cohort study</i> —For matched studies, give matching criteria and number of exposed and unexposed<br><i>Case-control study</i> —For matched studies, give matching criteria and the number of controls per case                                                                                                                                                                                                                                                 | NA                     |
| Variables                 | 7      | Clearly define all outcomes, exposures, predictors, potential confounders, and effect modifiers. Give diagnostic criteria, if applicable                                                                                                                                                                                                                                                                                                                               | 6, Supplementary table |
| Data sources/ measurement | 8*     | For each variable of interest, give sources of data and details of methods of assessment (measurement). Describe comparability of assessment methods if there is more than one group                                                                                                                                                                                                                                                                                   | 6, Supplementary table |
| Bias                      | 9      | Describe any efforts to address potential sources of bias                                                                                                                                                                                                                                                                                                                                                                                                              | 7                      |
| Study size                | 10     | Explain how the study size was arrived at                                                                                                                                                                                                                                                                                                                                                                                                                              | 5                      |
| Quantitative variables    | 11     | Explain how quantitative variables were handled in the analyses. If applicable, describe which groupings were chosen and why                                                                                                                                                                                                                                                                                                                                           | 6-7                    |
| Statistical methods       | 12     | (a) Describe all statistical methods, including those used to control for confounding                                                                                                                                                                                                                                                                                                                                                                                  | 6-7                    |
|                           |        | (b) Describe any methods used to examine subgroups and interactions                                                                                                                                                                                                                                                                                                                                                                                                    | 6-7                    |
|                           |        | (c) Explain how missing data were addressed                                                                                                                                                                                                                                                                                                                                                                                                                            | 7                      |
|                           |        | (d) <i>Cohort study</i> —If applicable, explain how loss to follow-up was addressed<br><i>Case-control study</i> —If applicable, explain how matching of cases and controls was addressed                                                                                                                                                                                                                                                                              | NA                     |

|                          |     |                                                                                                                                                                                                              |                     |
|--------------------------|-----|--------------------------------------------------------------------------------------------------------------------------------------------------------------------------------------------------------------|---------------------|
|                          |     | <i>Cross-sectional study</i> —If applicable, describe analytical methods taking account of sampling strategy                                                                                                 |                     |
|                          |     | (e) Describe any sensitivity analyses                                                                                                                                                                        | NA                  |
| <b>Results</b>           |     |                                                                                                                                                                                                              |                     |
| Participants             | 13* | (a) Report numbers of individuals at each stage of study—eg numbers potentially eligible, examined for eligibility, confirmed eligible, included in the study, completing follow-up, and analysed            | 4-5                 |
|                          |     | (b) Give reasons for non-participation at each stage                                                                                                                                                         | 4-5                 |
|                          |     | (c) Consider use of a flow diagram                                                                                                                                                                           |                     |
| Descriptive data         | 14* | (a) Give characteristics of study participants (eg demographic, clinical, social) and information on exposures and potential confounders                                                                     | Page 5, Table 1     |
|                          |     | (b) Indicate number of participants with missing data for each variable of interest                                                                                                                          |                     |
| Outcome data             | 15* | <i>Cohort study</i> —Report numbers of outcome events or summary measures over time                                                                                                                          | NA                  |
|                          |     | <i>Case-control study</i> —Report numbers in each exposure category, or summary measures of exposure                                                                                                         | NA                  |
|                          |     | <i>Cross-sectional study</i> —Report numbers of outcome events or summary measures                                                                                                                           | Table 2 & Table 3   |
| Main results             | 16  | (a) Give unadjusted estimates and, if applicable, confounder-adjusted estimates and their precision (eg, 95% confidence interval). Make clear which confounders were adjusted for and why they were included | Table 2 and Table 3 |
|                          |     | (b) Report category boundaries when continuous variables were categorized                                                                                                                                    | NA                  |
|                          |     | (c) If relevant, consider translating estimates of relative risk into absolute risk for a meaningful time period                                                                                             | NA                  |
| Other analyses           | 17  | Report other analyses done—eg analyses of subgroups and interactions, and sensitivity analyses                                                                                                               | NA                  |
| <b>Discussion</b>        |     |                                                                                                                                                                                                              |                     |
| Key results              | 18  | Summarise key results with reference to study objectives                                                                                                                                                     | 19                  |
| Limitations              | 19  | Discuss limitations of the study, taking into account sources of potential bias or imprecision. Discuss both direction and magnitude of any potential bias                                                   | 21                  |
| Interpretation           | 20  | Give a cautious overall interpretation of results considering objectives, limitations, multiplicity of analyses, results from similar studies, and other relevant evidence                                   | 20                  |
| Generalisability         | 21  | Discuss the generalisability (external validity) of the study results                                                                                                                                        | 19                  |
| <b>Other information</b> |     |                                                                                                                                                                                                              |                     |
| Funding                  | 22  | Give the source of funding and the role of the funders for the present study and, if applicable, for the original study on which the present article is based                                                | 2                   |

\*Give information separately for cases and controls in case-control studies and, if applicable, for exposed and unexposed groups in cohort and cross-sectional studies.

**Note:** An Explanation and Elaboration article discusses each checklist item and gives methodological background and published examples of transparent reporting. The STROBE checklist is best used in conjunction with this article (freely available on the Web sites of PLoS Medicine at <http://www.plosmedicine.org/>, Annals of Internal Medicine at <http://www.annals.org/>, and Epidemiology at <http://www.epidem.com/>). Information on the STROBE Initiative is available at [www.strobe-statement.org](http://www.strobe-statement.org).
