# Supplementary material for: Change in prevalence rates of physical and sexual intimate partner violence against women: data from two cross-sectional studies in New Zealand, 2003 and 2019
Source: PubMed Central journal article supplement — BMJ Open. 2021 Mar 23;11(3):e044907. doi: 10.1136/bmjopen-2020-044907 (PMC7993160; doi:10.1136/bmjopen-2020-044907), 2021-03-23
Supplement: bmjopen-2020-044907supp001.pdf [file bmjopen-2020-044907supp001.pdf]

Supplementary Table 1. Definition of lifetime and past 12-month physical and sexual IPV, sociodemographic factors, attitude toward violence against women and gender roles, and help seeking behaviours in the 2003 and 2019 surveys

| Variable                                       | Definition                                                                                                                                                                                                                                                                                                                                                                                                                              |
|------------------------------------------------|-----------------------------------------------------------------------------------------------------------------------------------------------------------------------------------------------------------------------------------------------------------------------------------------------------------------------------------------------------------------------------------------------------------------------------------------|
| <b>Ever-partnered</b>                          | If they had ever been married, ever lived with, or were currently with a regular sexual partner.                                                                                                                                                                                                                                                                                                                                        |
| <b>Lifetime Physical IPV</b>                   | Participants were categorised as experiencing lifetime physical IPV if they reported having experienced one or more of the following moderate or severe acts of physical violence.<br><br><b>Moderate:</b> Have been slapped or had something thrown at or have been pushed, shoved, or had their hair pulled<br><br><b>Severe:</b> Have been kicked, dragged, beaten up, hit with fist or something else, choked or burnt              |
| <b>12-Month Physical IPV</b>                   | Participants were categorised as experiencing 12-month physical IPV if they reported having experienced one or more acts of the physical IPV in the last 12 months prior to the data collection                                                                                                                                                                                                                                         |
| <b>Sexual IPV</b>                              | Participants were categorised as experiencing lifetime sexual IPV if they reported having experienced one or more of the following acts: being physically forced to have sexual intercourse when the woman did not want to; having sexual intercourse because she was afraid of what her partner might do or being forced to do something sexual that she found degrading or humiliating.                                               |
| <b>12-Month Sexual IPV</b>                     | Participants were categorised as experiencing 12-month sexual IPV if they reported having experienced one or more acts of the sexual IPV in the last 12 months prior to the data collection                                                                                                                                                                                                                                             |
| <b>Independent source of income</b>            | Have access to income from wages or investments, retirement income (yes or no).                                                                                                                                                                                                                                                                                                                                                         |
| <b>Deprivation level</b>                       | Taken from NZ index of multiple deprivation (IMD) <sup>44</sup> which used a combination of routinely collected data from government departments and census data in seven domains (i.e. employment, income, crime, housing, health, education, and access to services) to develop a measure of deprivation at the neighborhood level. Participants were classified in three groups: living in least, moderately and most deprived area. |
| <b>Attitudes toward a man hitting his wife</b> | Participant opinion on six conditions under which hitting or beating one's wife was considered justified : she doesn't complete her household work to his satisfaction; she disobeys him; she refuses to have sex with him; she ask him whether he has other girlfriends; he suspects that she is unfaithful; he finds out that she has been unfaithful. Response options were yes and no.                                              |
| <b>Attitudes toward gender roles</b>           | Participant's attitude about acceptable behaviour for men and women in relationships, and views on family issues being made public: A good wife obeys her husband even if she disagrees; family problems should only be discussed with people in the family; it is important for a man to show his partner who is boss; a woman should be able to choose her own friends even                                                           |

| <b>Variable</b>              | <b>Definition</b>                                                                                                                                                                                      |
|------------------------------|--------------------------------------------------------------------------------------------------------------------------------------------------------------------------------------------------------|
|                              | if her husband disapproves; it is a wife's obligation to have sex with her husband even if she doesn't feel like it                                                                                    |
| <b>Formal help-seeking</b>   | Contact with service agencies including: police, lawyers, courts, health professionals and mental health workers, or NGOs and community based service providers, including Women's Refuges, and Marae. |
| <b>Informal help seeking</b> | Support from family, friends, neighbours, or workmates.                                                                                                                                                |
